# Supplementary material for: An autocrine ActivinB mechanism drives TGFβ/Activin signaling in Group 3 medulloblastoma
Source: PubMed Central journal article supplement (PMC6685082; doi:10.15252/emmm.201809830), 2019-07-22

# Figure 1A

Patient samples

# Patient samples WNT (262) and SHH (263)

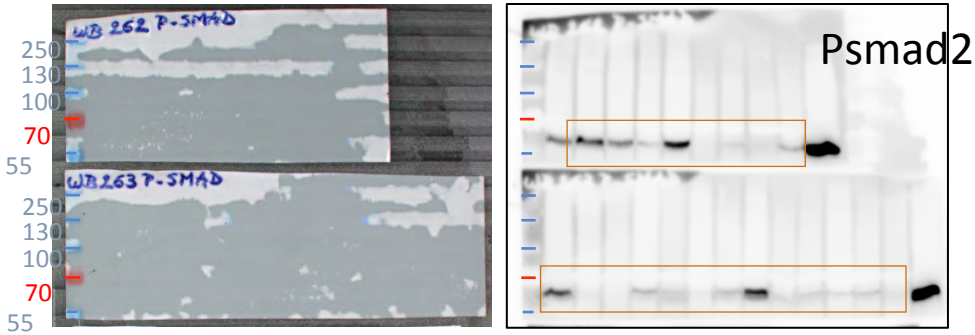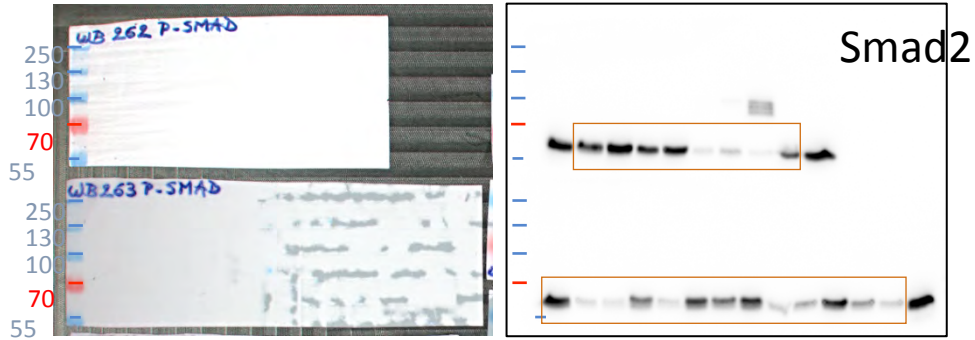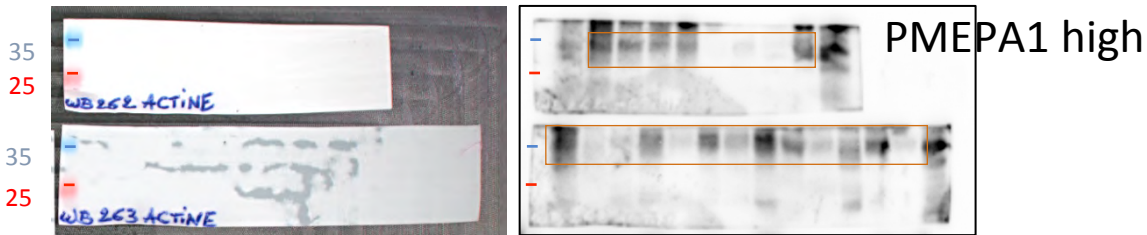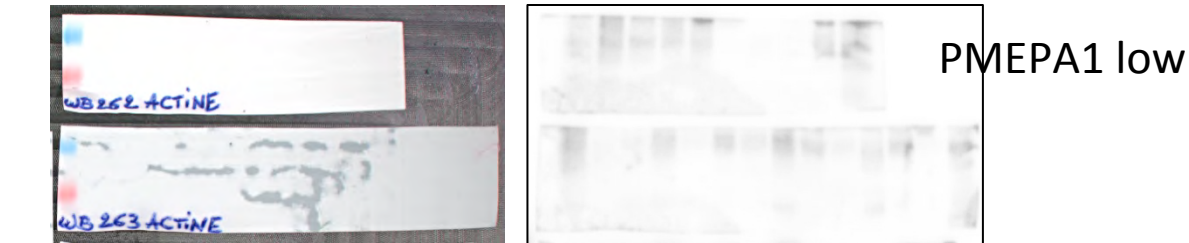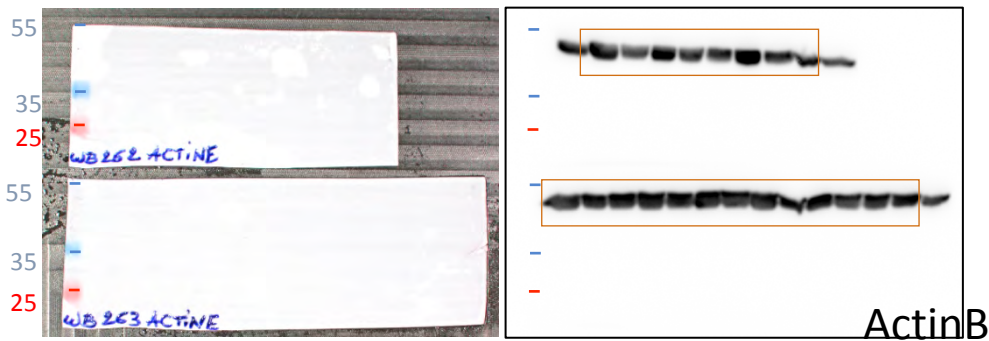

**Patient samples Gpe3 (292) and Gpe4 (293)**

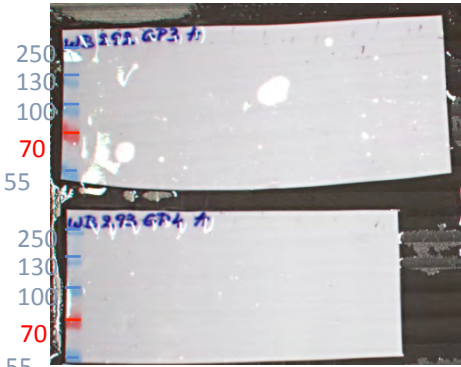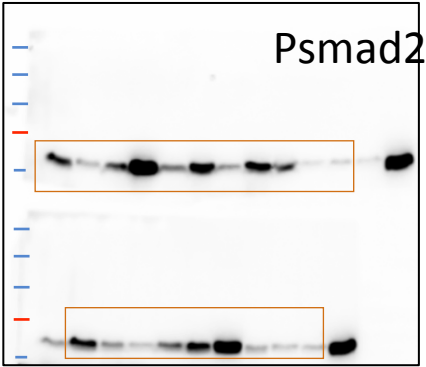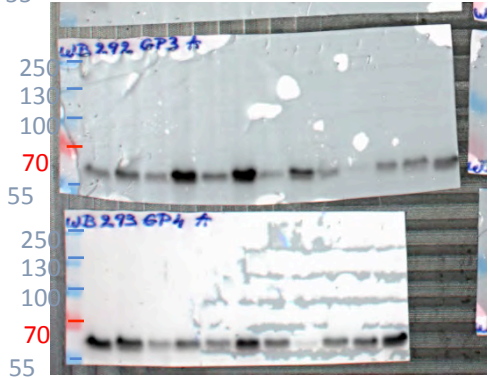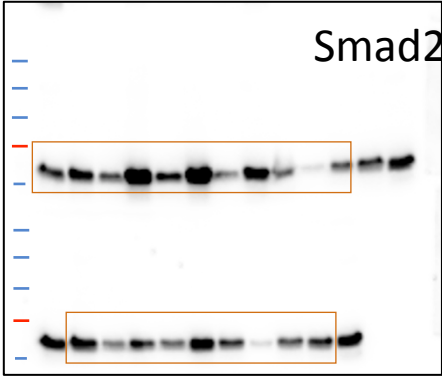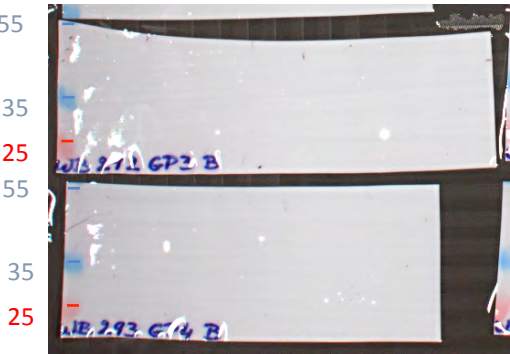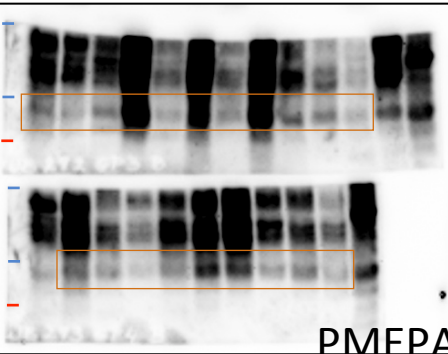

PMEPA1 high

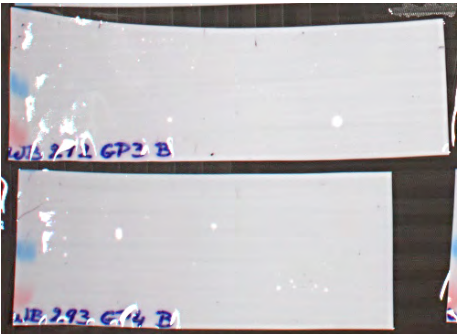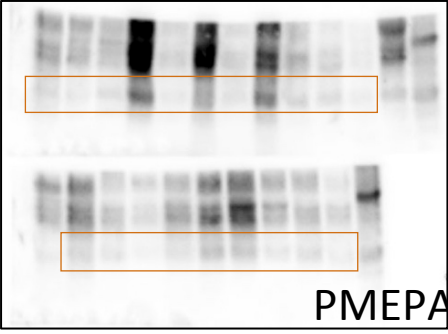

PMEPA1 low

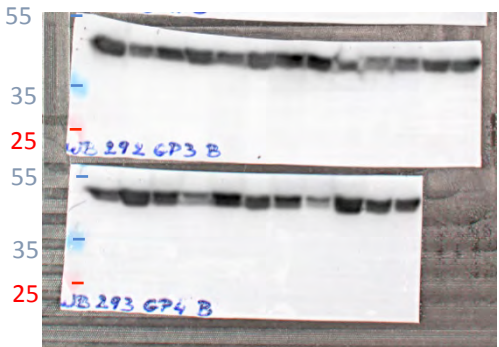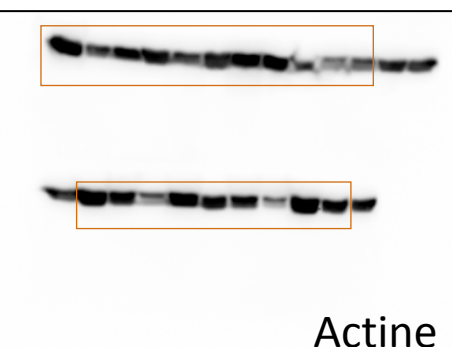

Actine

# Figure 1C

All MB cell lines

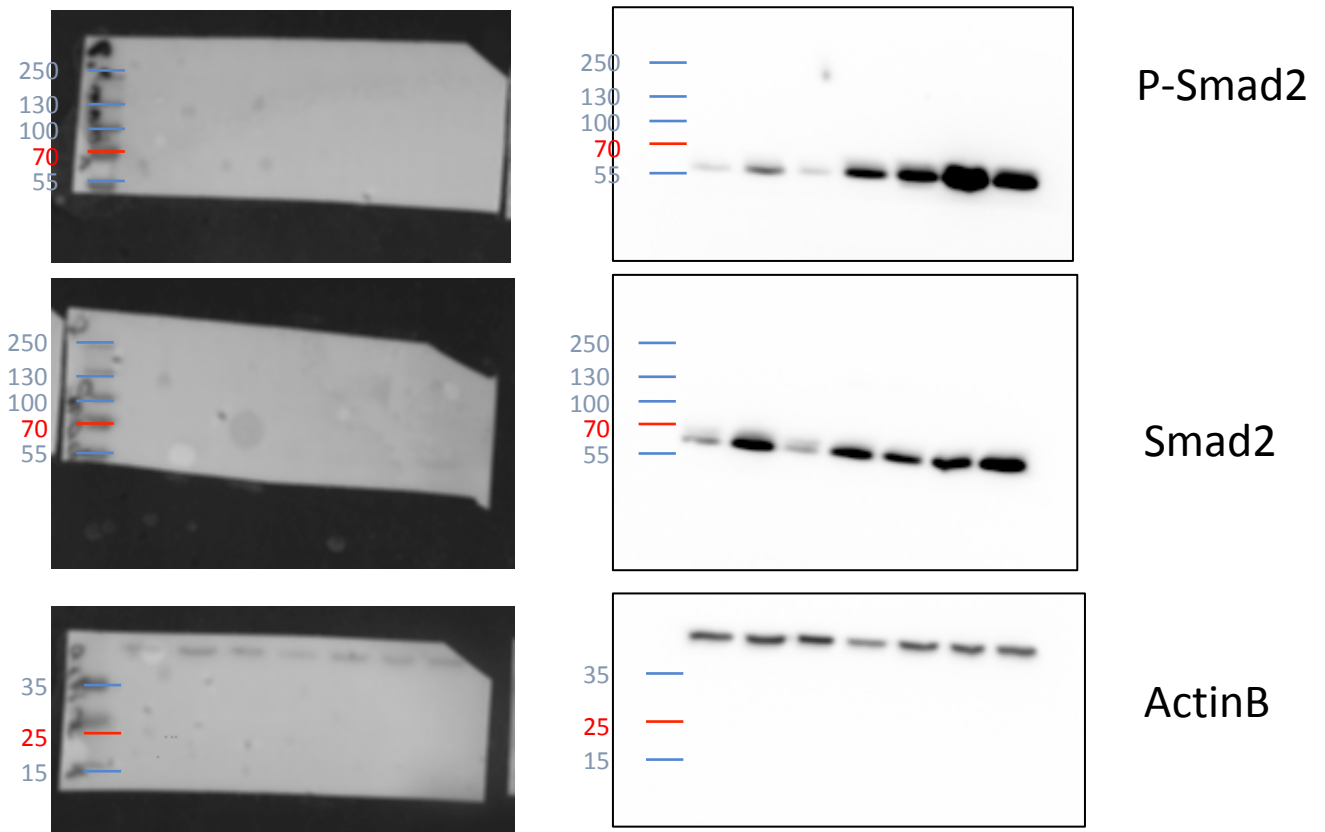

Supplement: EMMM-11-e9830-s003.pdf [file EMMM-11-e9830-s003.pdf]
