# Supplementary material for: An autocrine ActivinB mechanism drives TGFβ/Activin signaling in Group 3 medulloblastoma
Source: PubMed Central journal article supplement (PMC6685082; doi:10.15252/emmm.201809830), 2019-07-22

# Figure 2A

Cell lines

Activin or TGF $\beta$  stimulations

## 2A – 10/3/16 DAOY

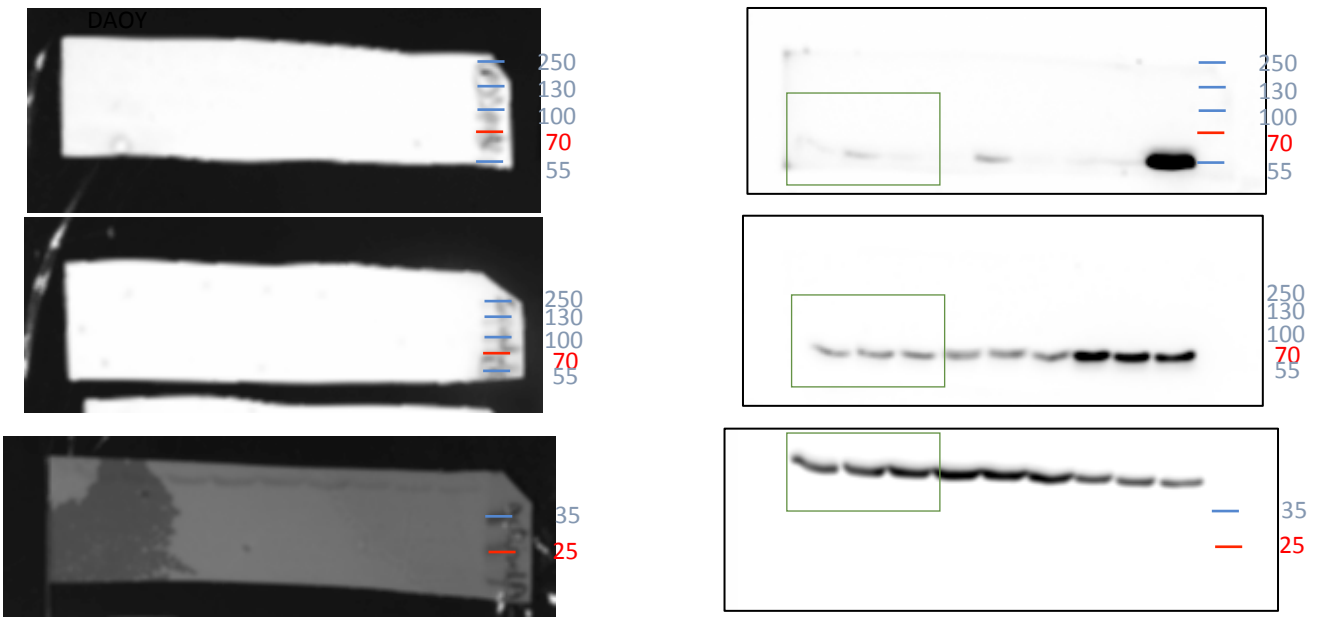

## 2A – ONS76

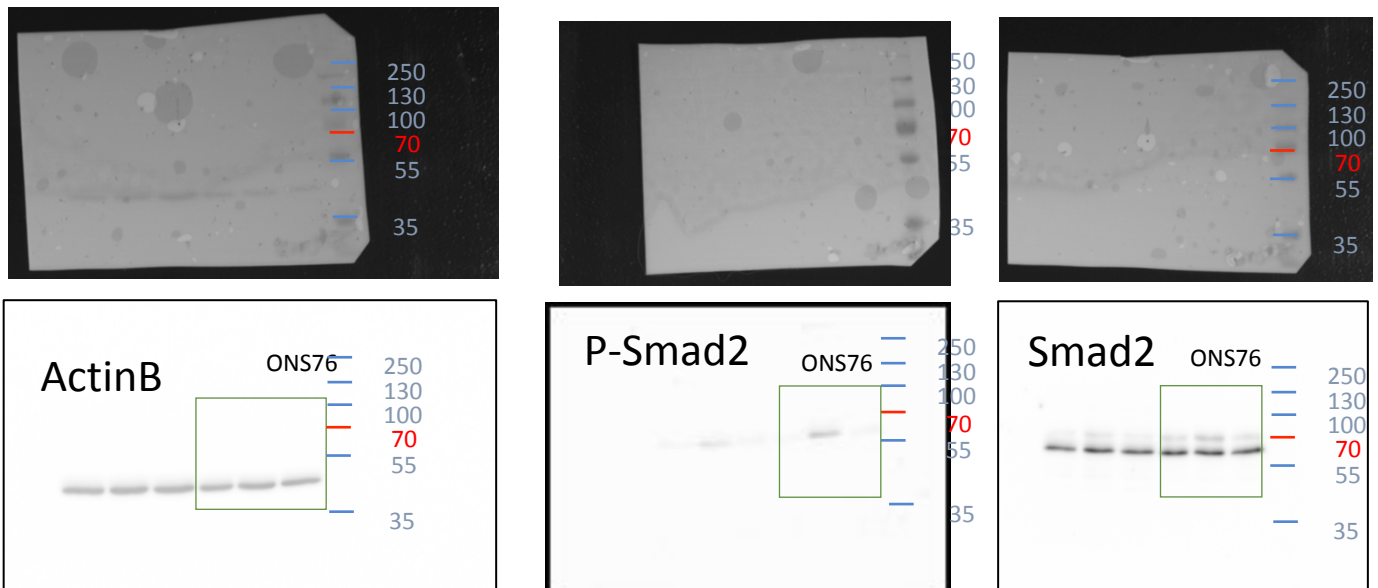

2A – UW228 – D283

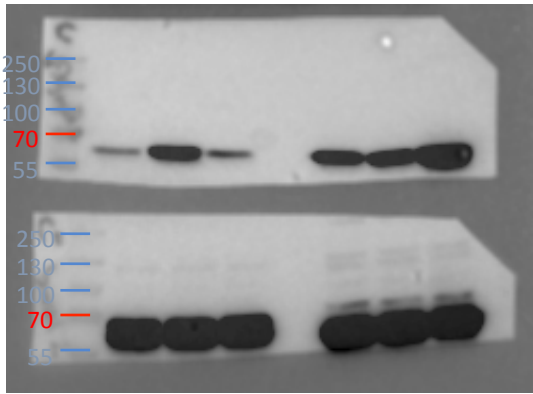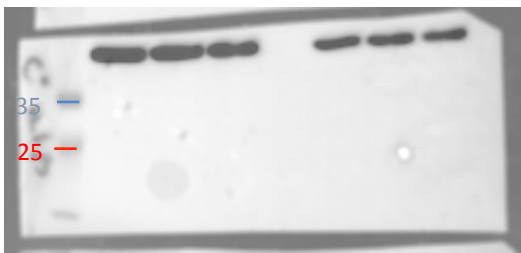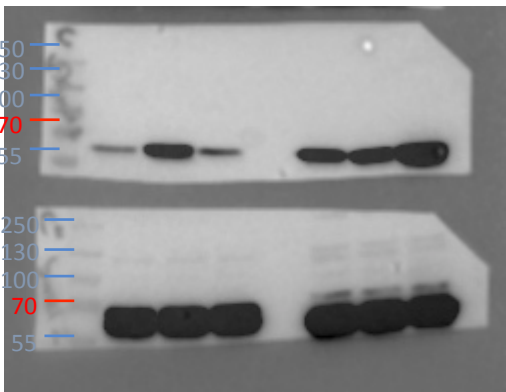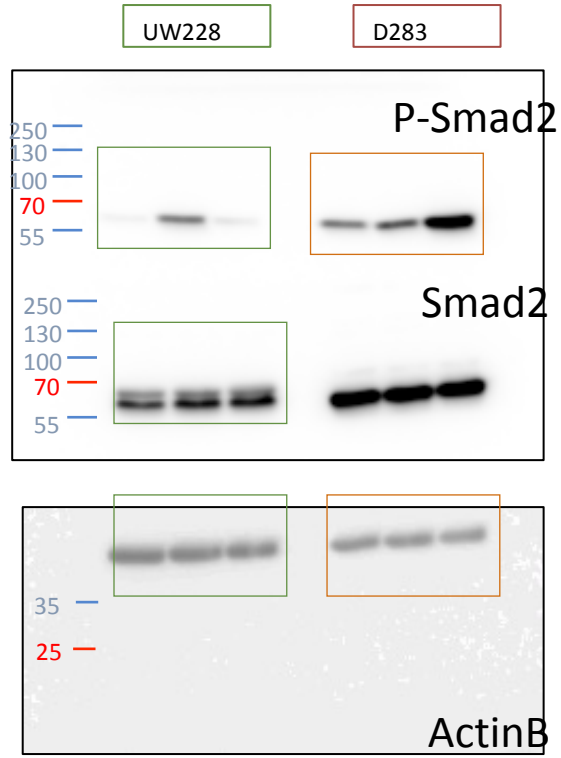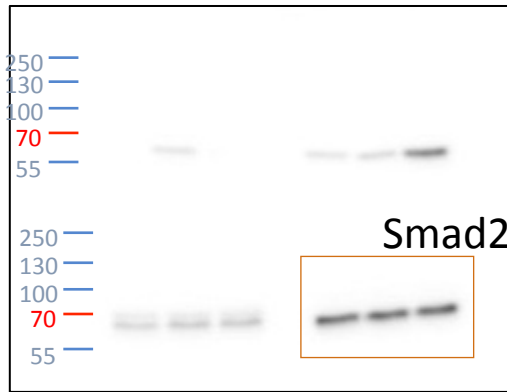

## HDMB03 ET D458 P/T/A WB35

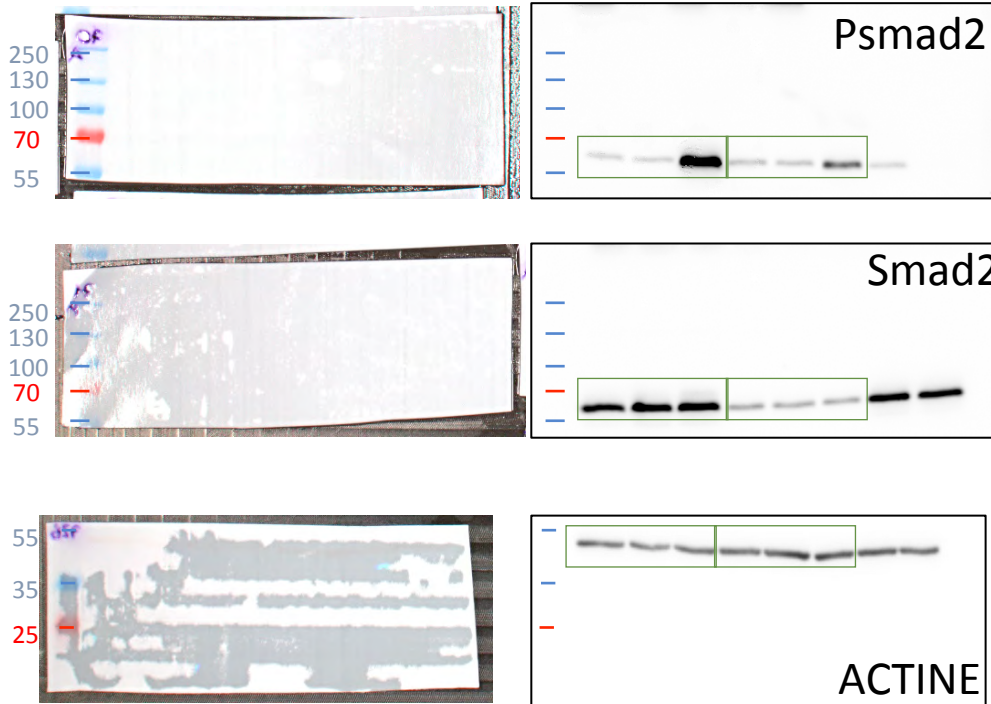

## 1603 P T A

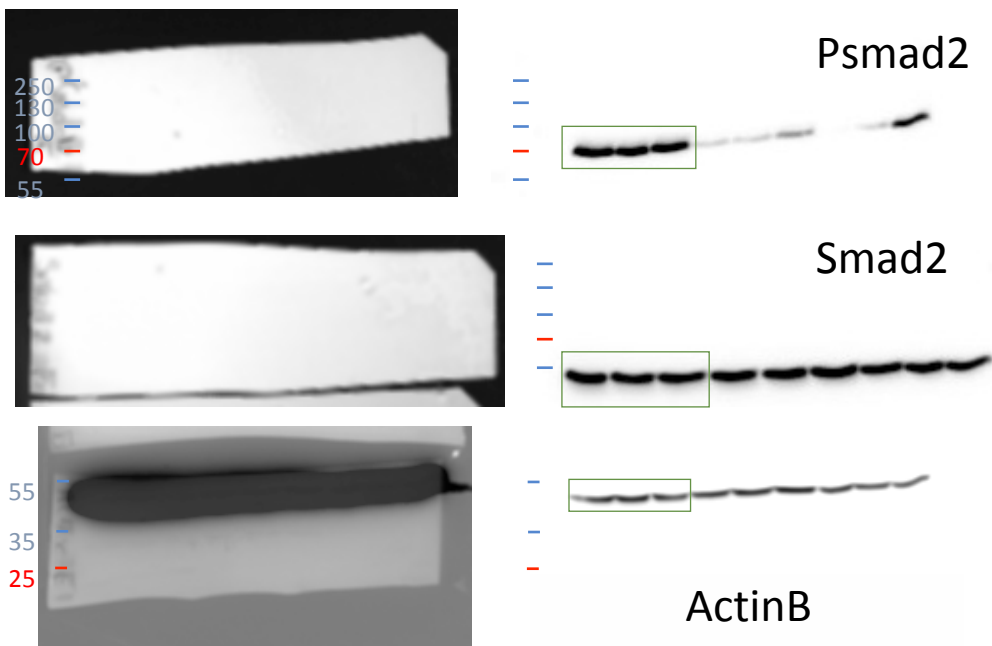

Figure 2B

# 1603 Ab

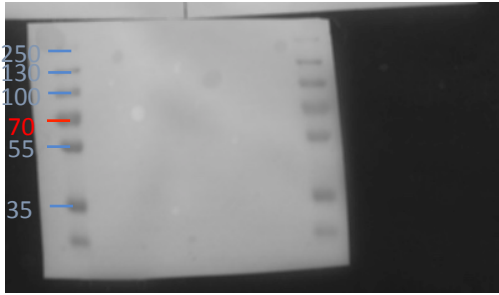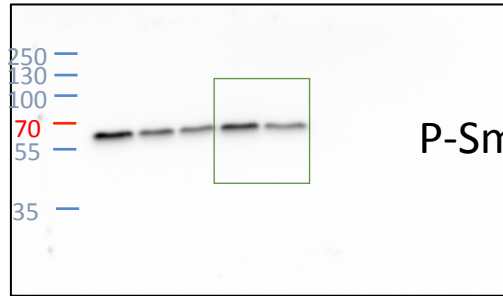

P-Smad2

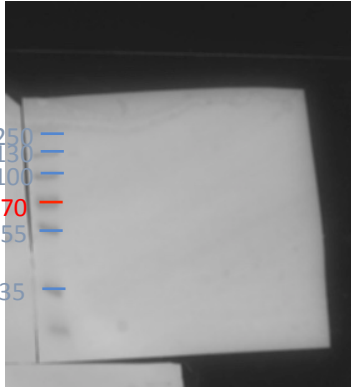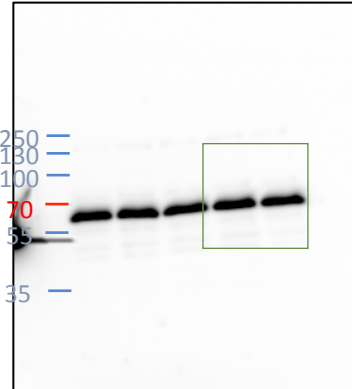

Smad2

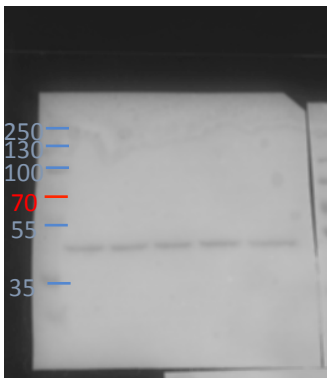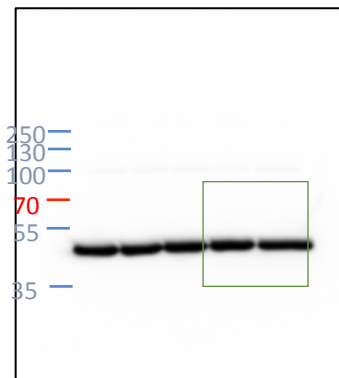

ActinB

# 1603 FLT WB 31

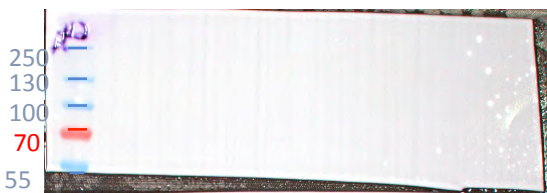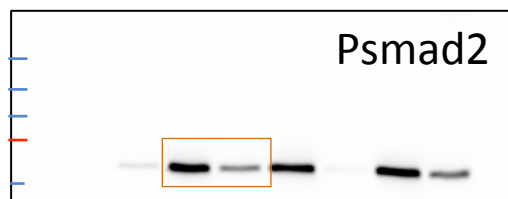

Psmad2

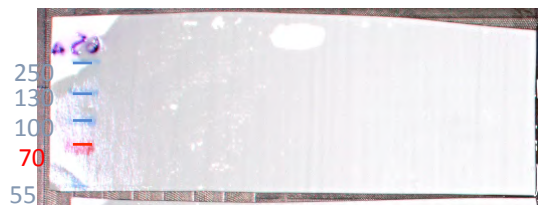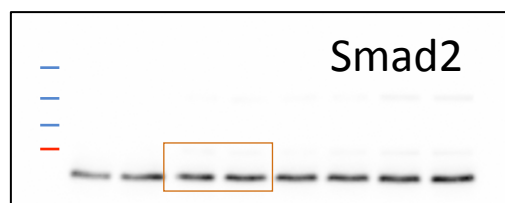

Smad2

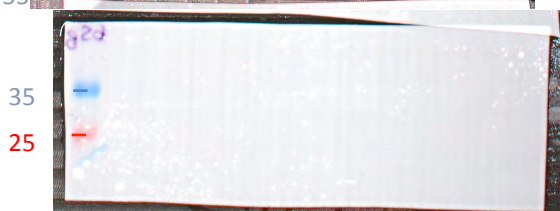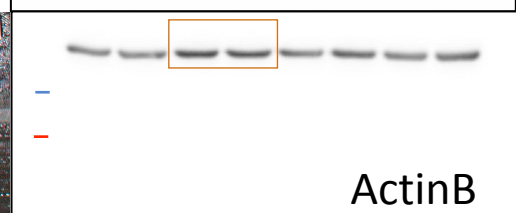

ActinB

# Figure 2C and E

conditioned media and siINHBB

2C

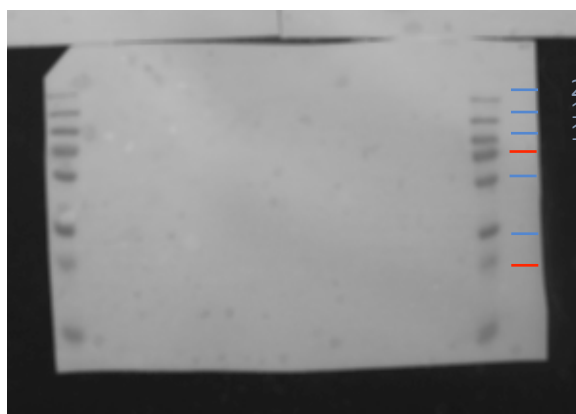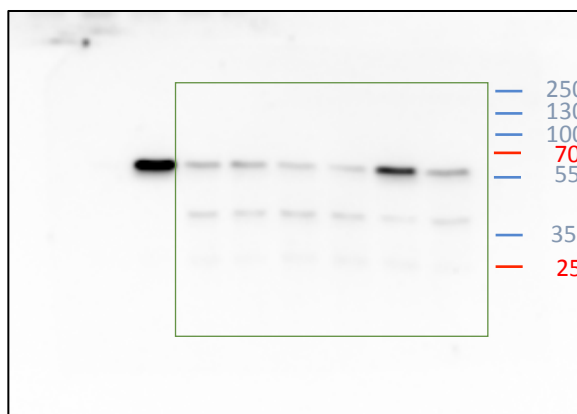

P-Smad2

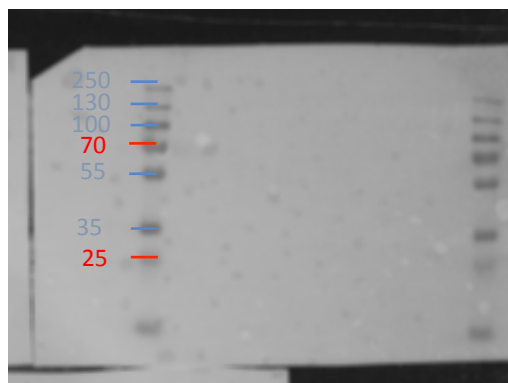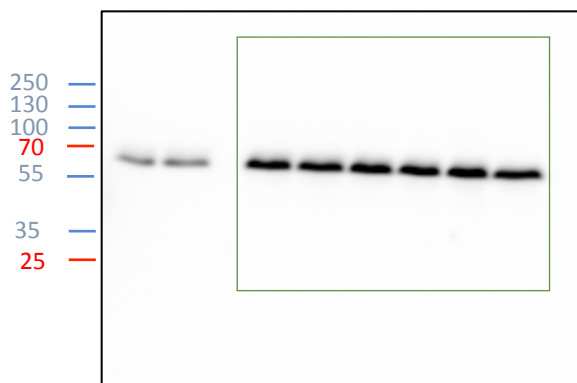

Smad2

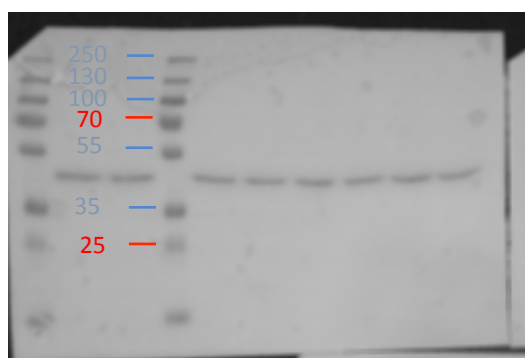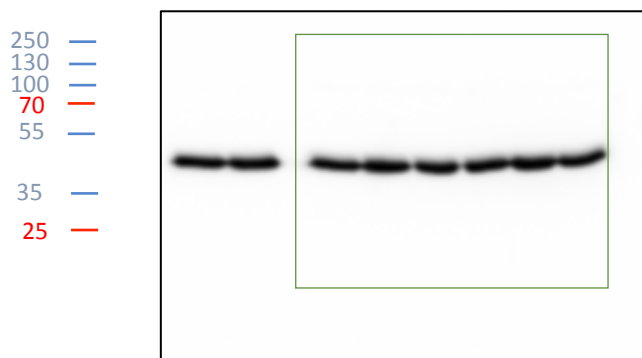

ActinB



**2E**

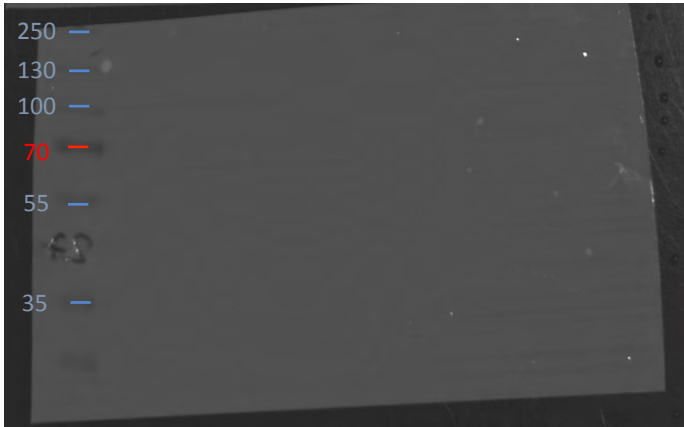

P-Smad2

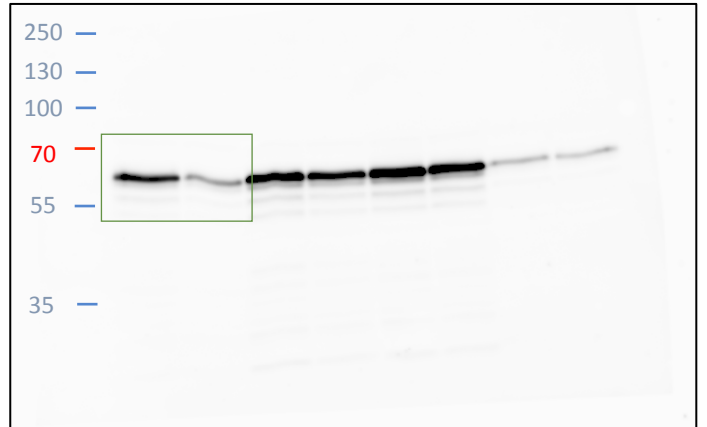

Smad2

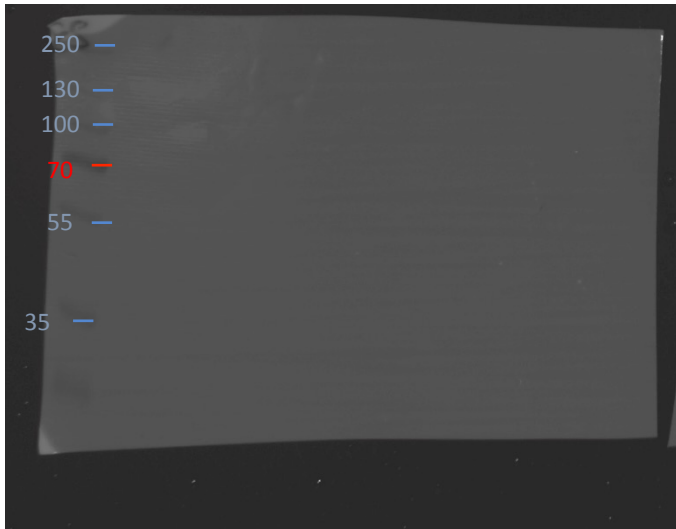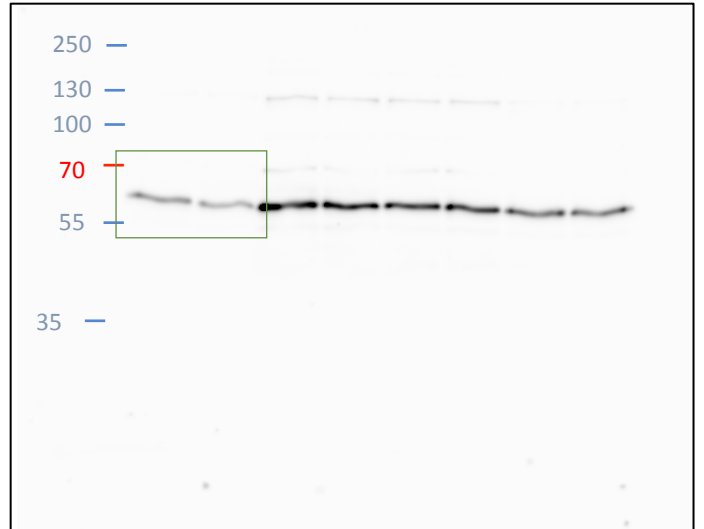

ActinB

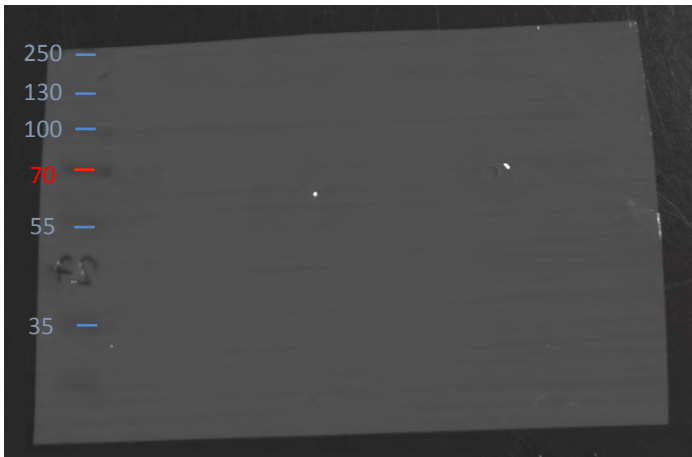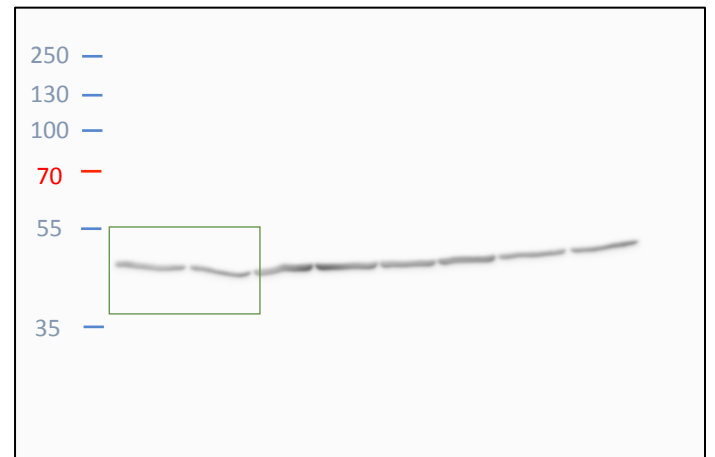

Supplement: EMMM-11-e9830-s004.pdf [file EMMM-11-e9830-s004.pdf]
