# Supplementary material for: An autocrine ActivinB mechanism drives TGFβ/Activin signaling in Group 3 medulloblastoma
Source: PubMed Central journal article supplement (PMC6685082; doi:10.15252/emmm.201809830), 2019-07-22

# Figure 5F

D/L/S and P/A

# 1603 D L S WB93\_TARGET GENES

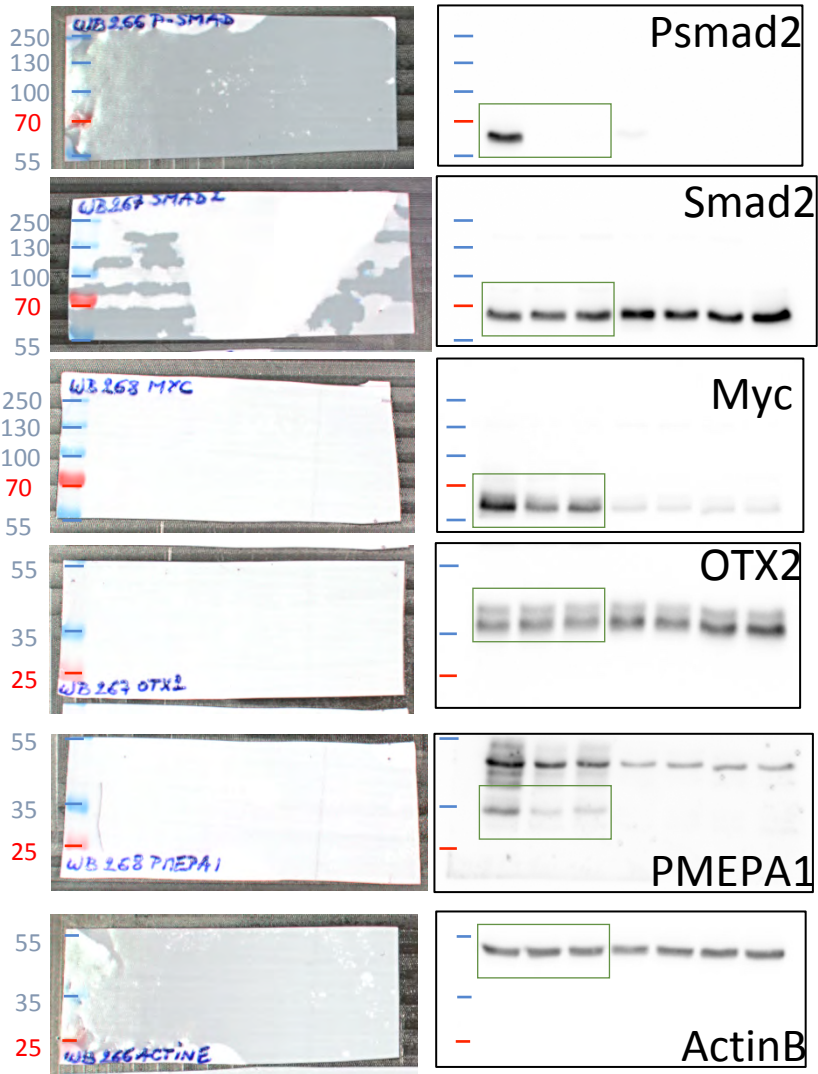

# D283 PA 1603 Ab WB 11

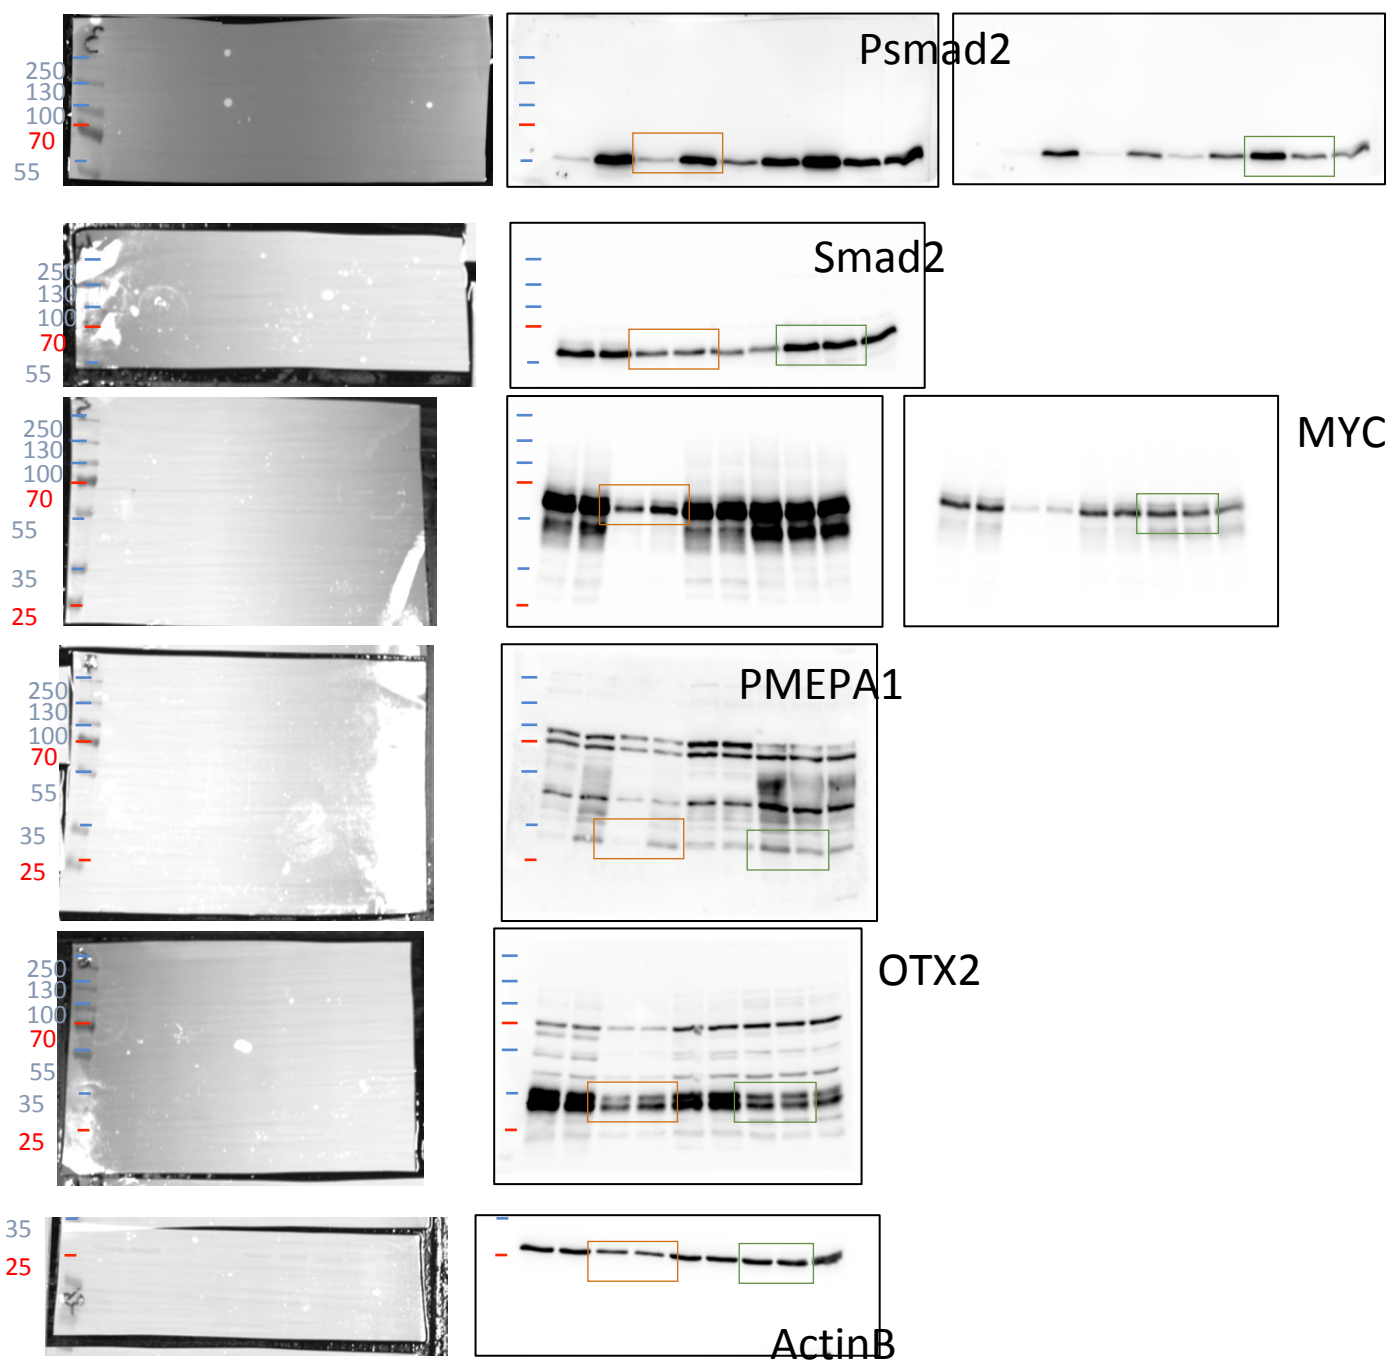

# 1603 FLT WB 33 TARGET

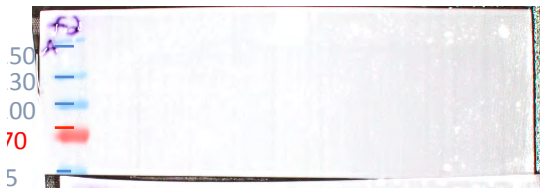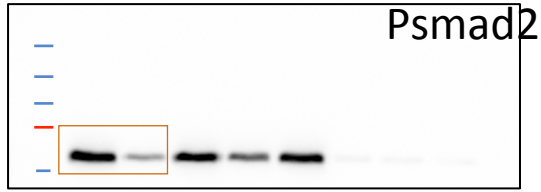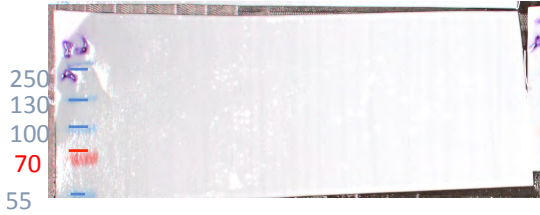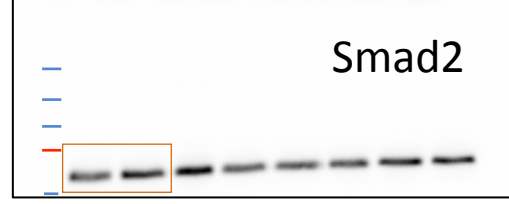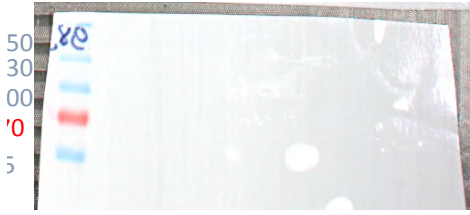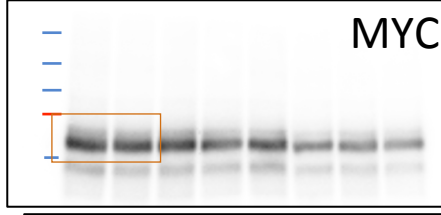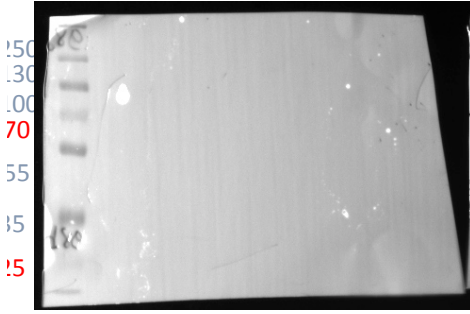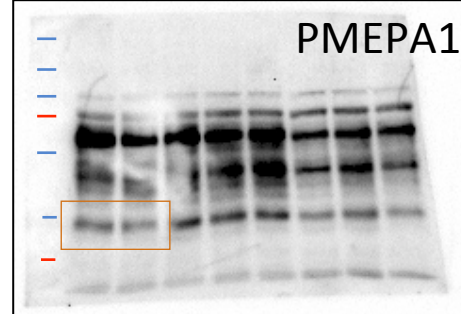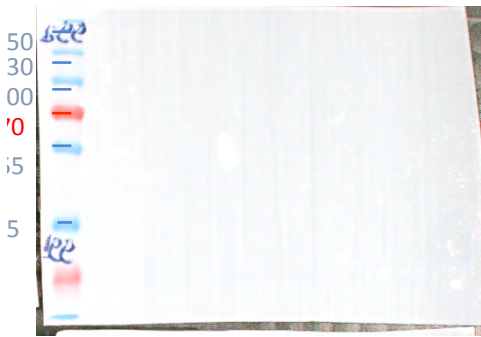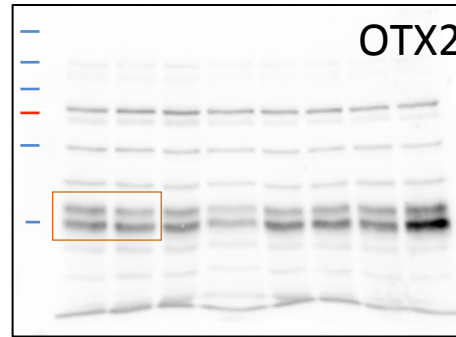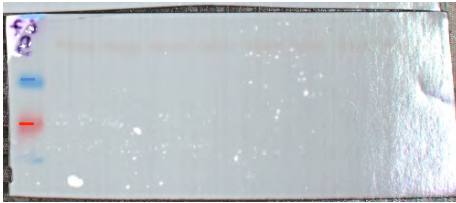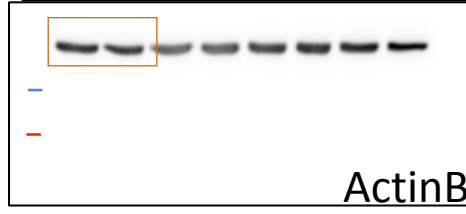

# d458 PA TARGET GENES WB29\_PSMAD

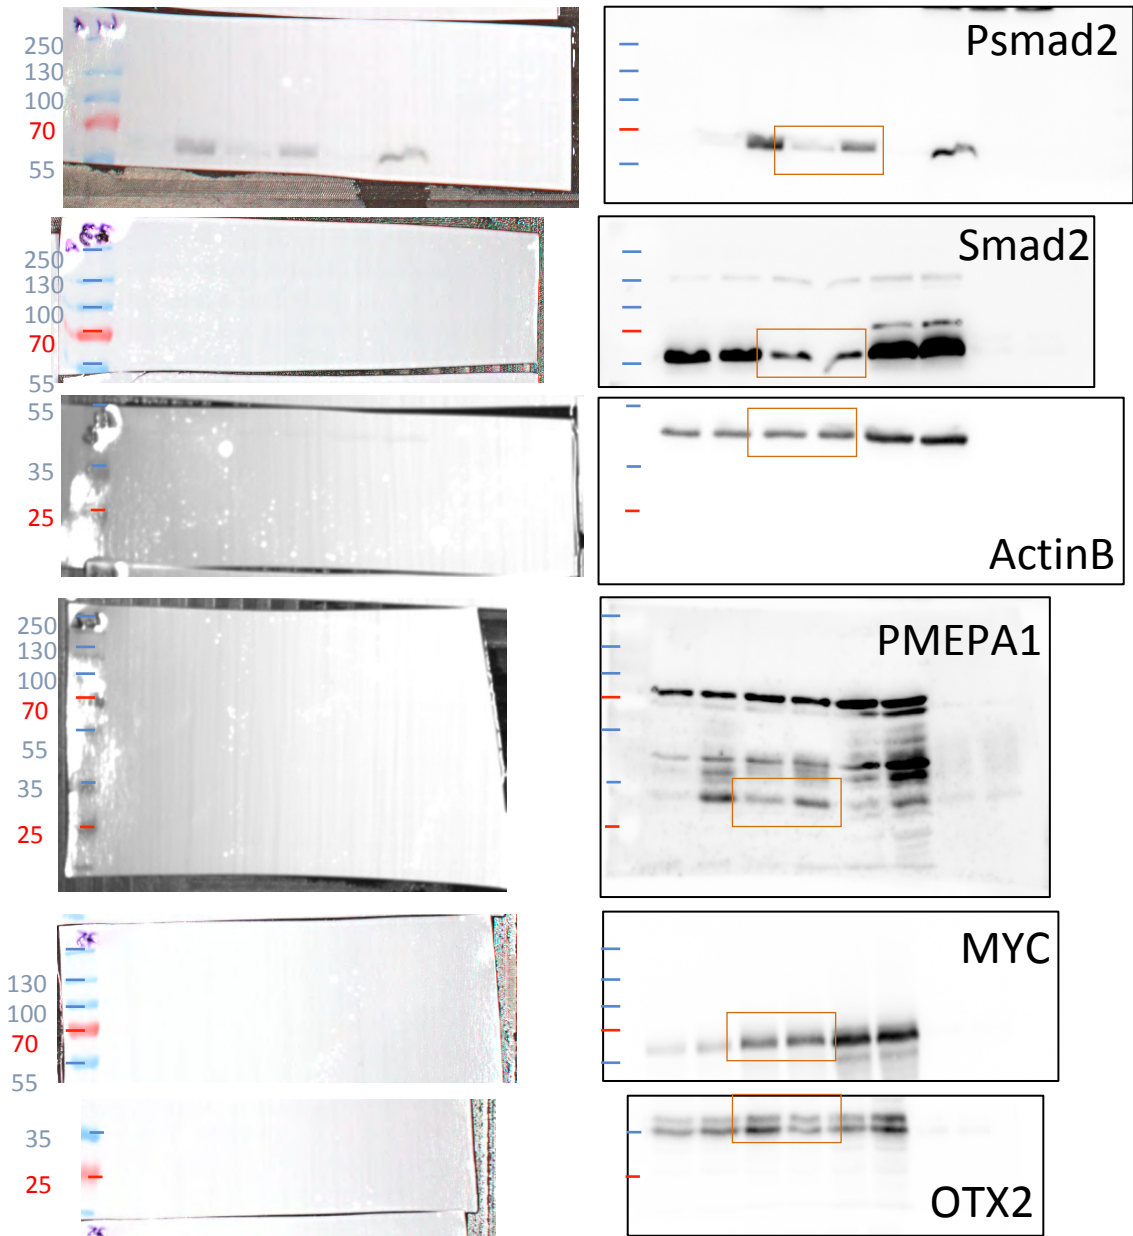

# d283 DLSG TARGET GENES \_ PSMAD

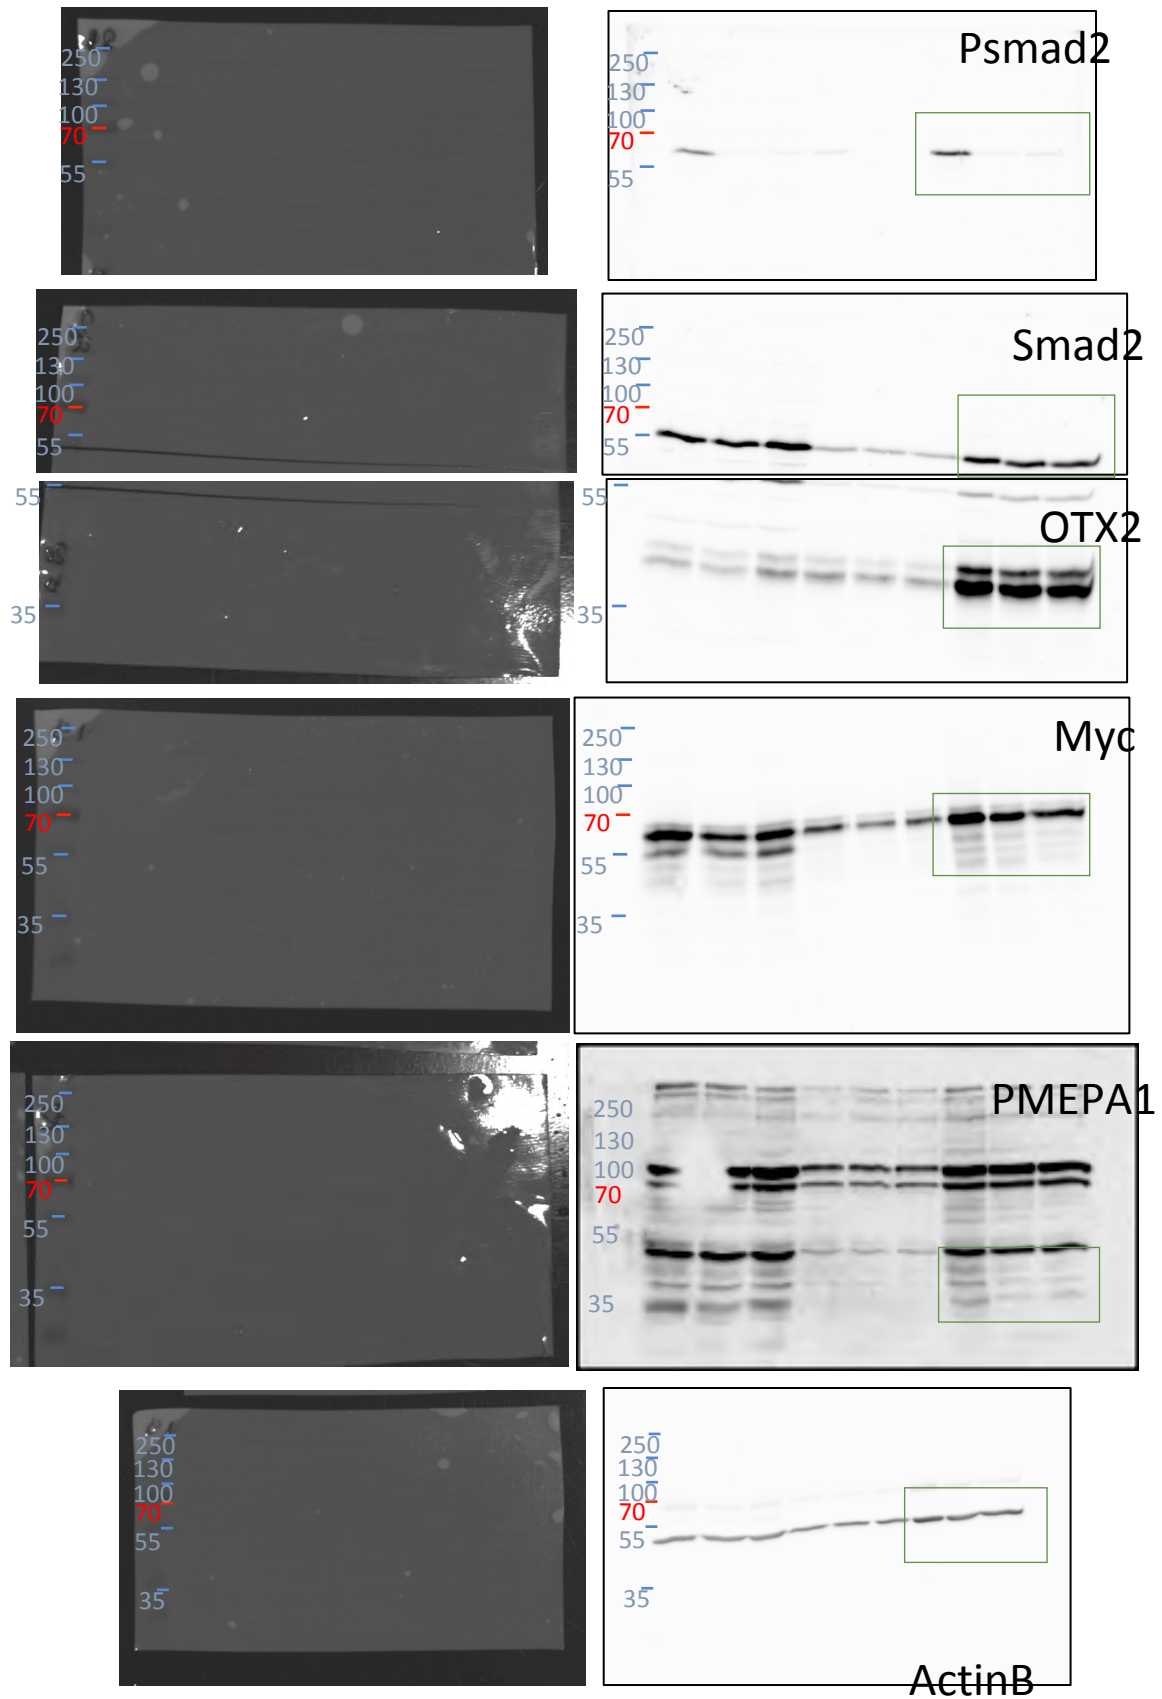

Supplement: EMMM-11-e9830-s007.pdf [file EMMM-11-e9830-s007.pdf]
