# Supplementary material for: An autocrine ActivinB mechanism drives TGFβ/Activin signaling in Group 3 medulloblastoma
Source: PubMed Central journal article supplement (PMC6685082; doi:10.15252/emmm.201809830), 2019-07-22

# Figure 6A

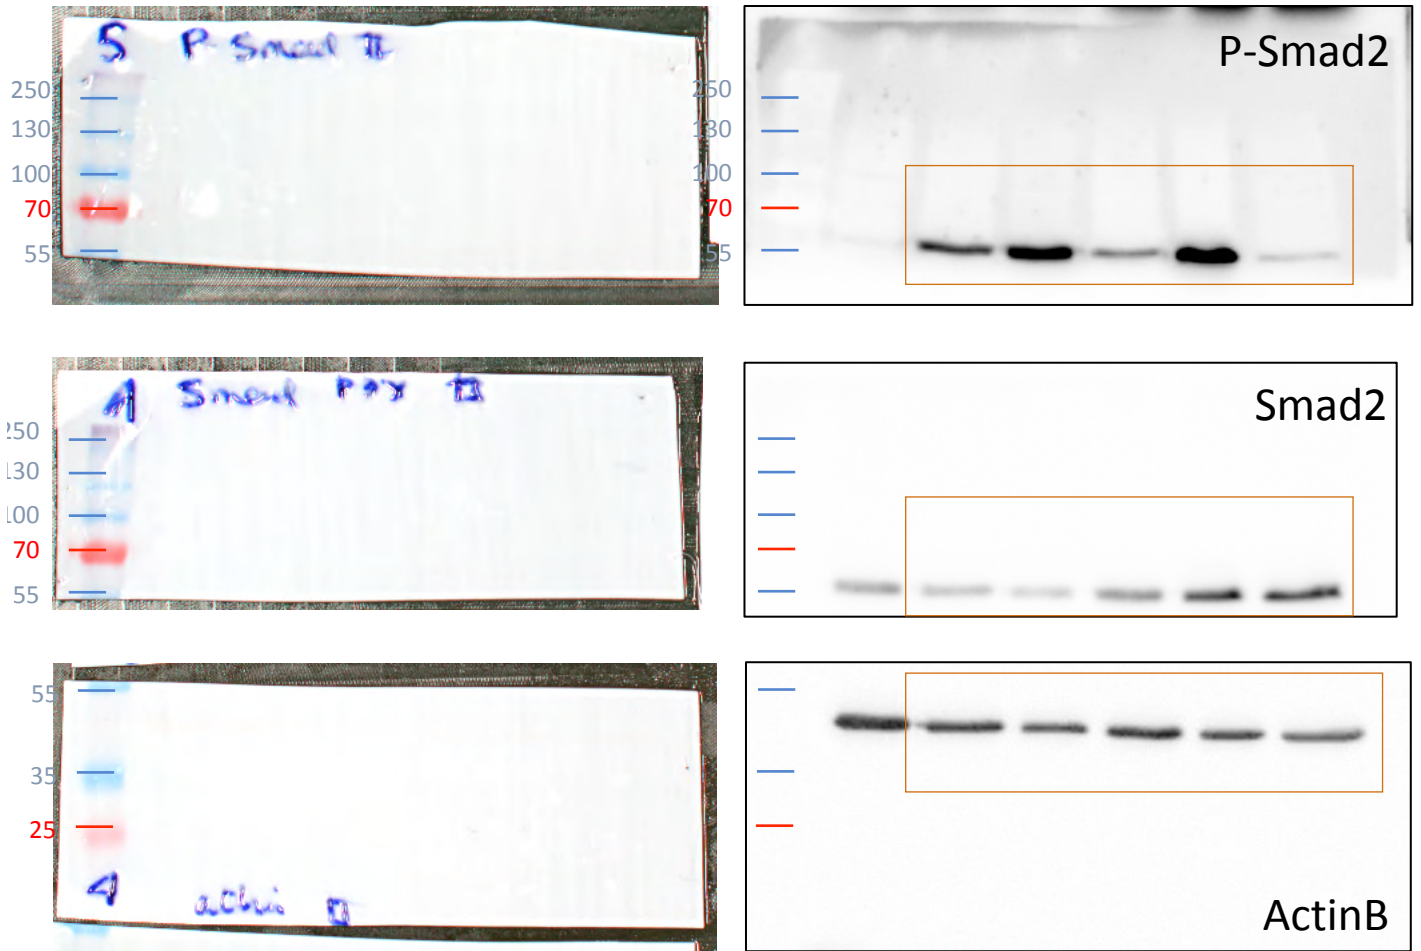

# Figure 6D

## MC PDX4

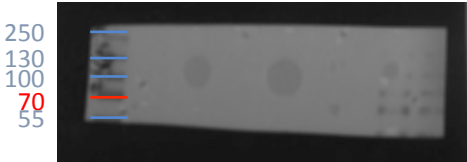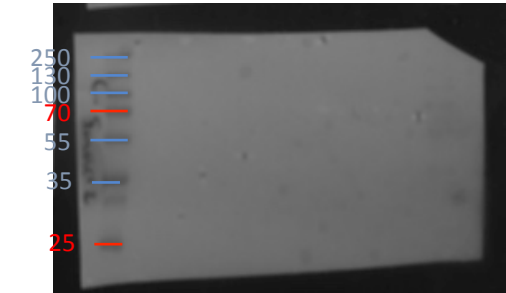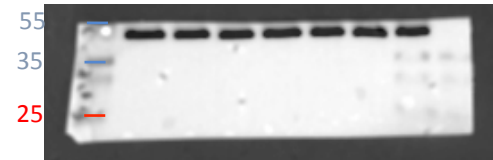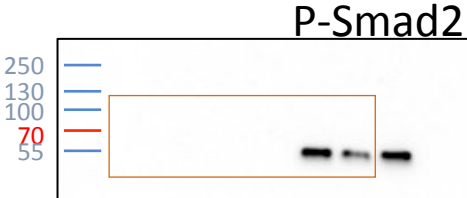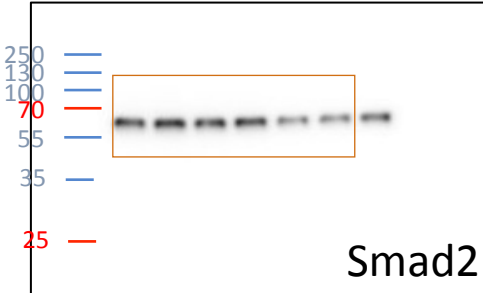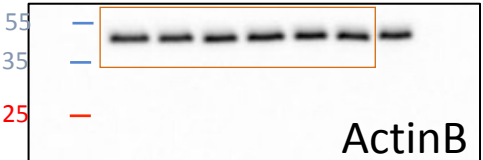

Figure 6C

## 6C-PDX3

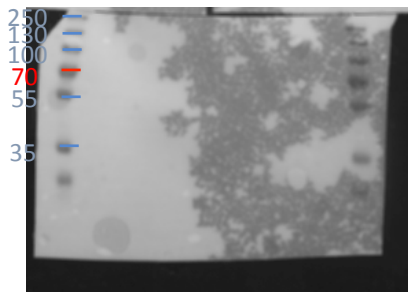

P-Smad2

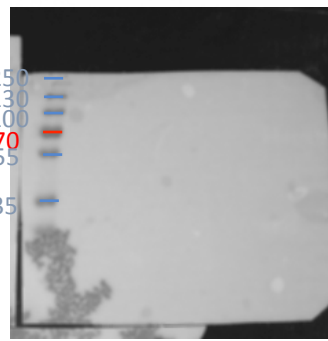

Smad2

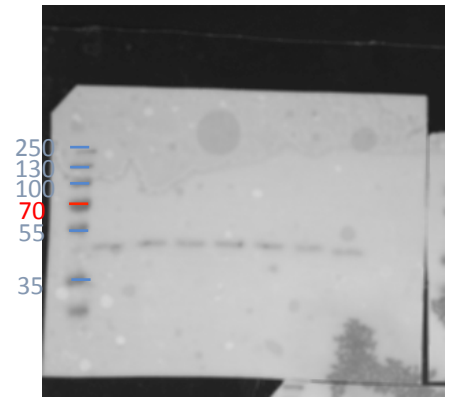

ActinB

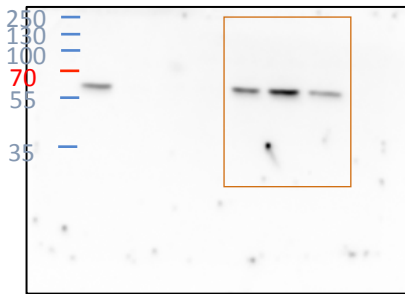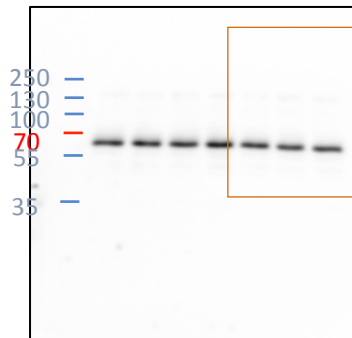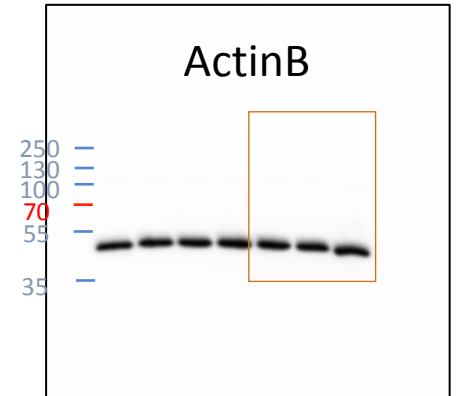

## 6C-PDX7

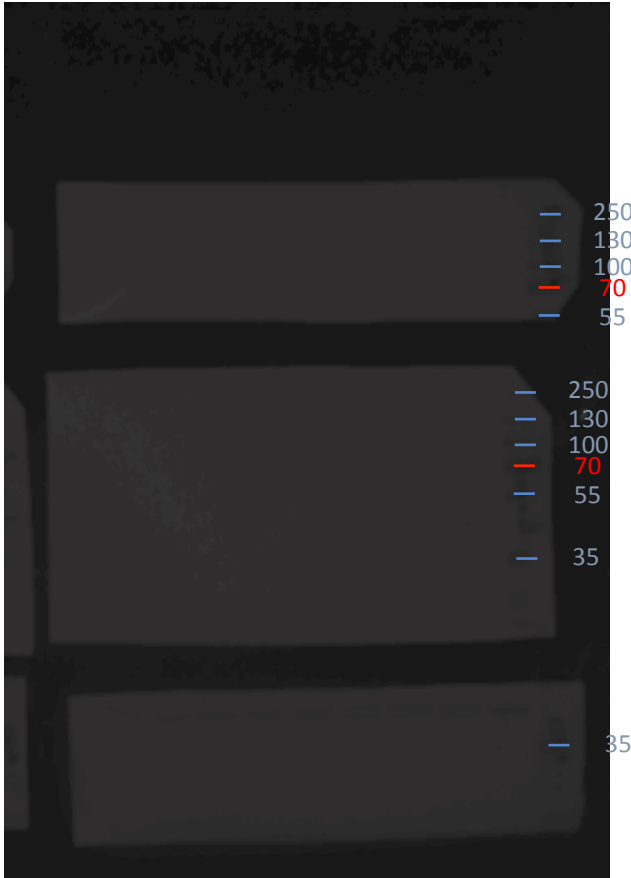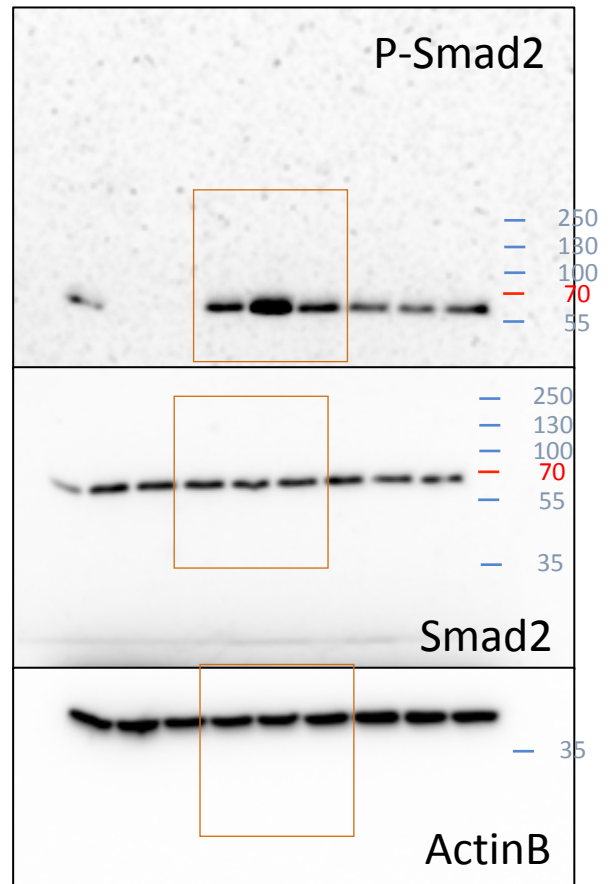

# 6C-PDX4

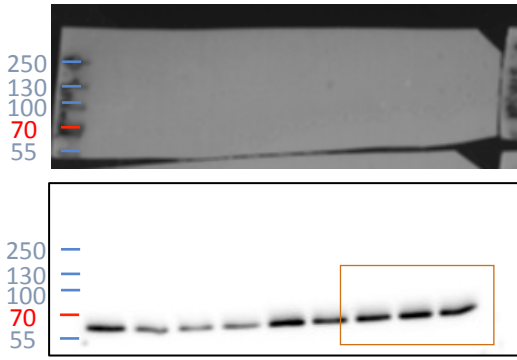

P-Smad2

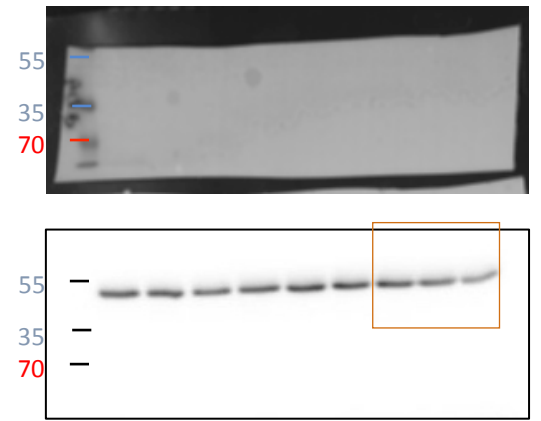

ActinB

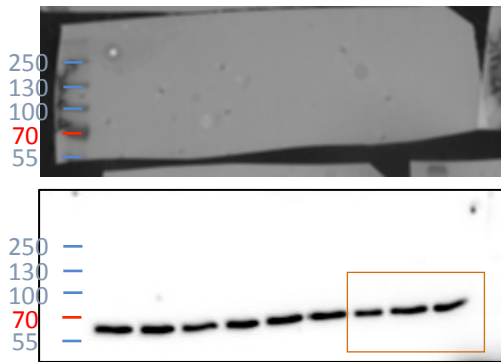

Smad2

Figure 6E

# PDX4\_DLS\_WB64

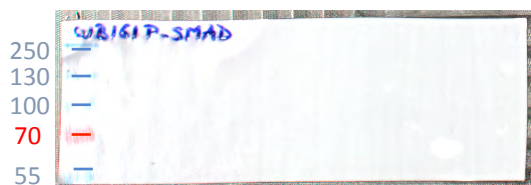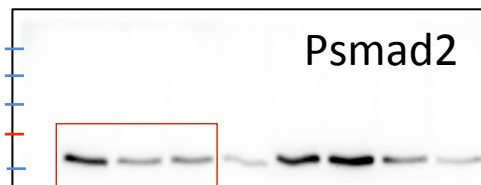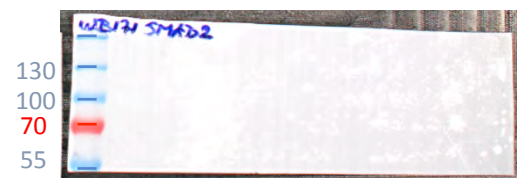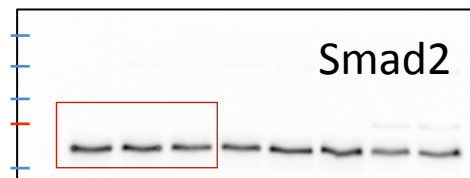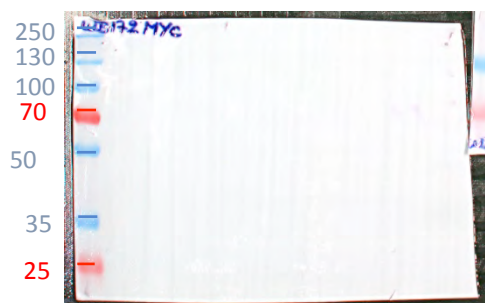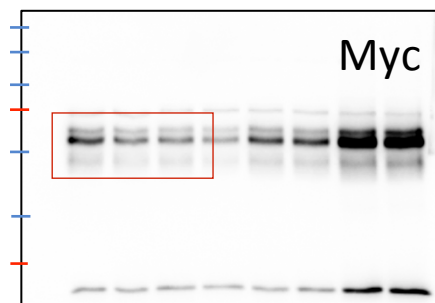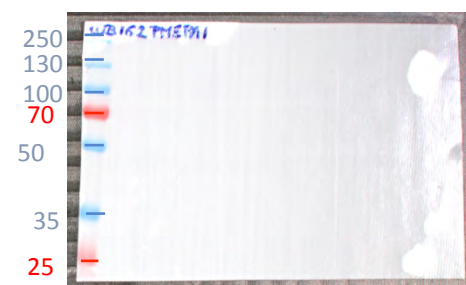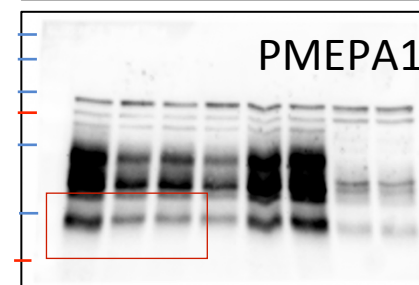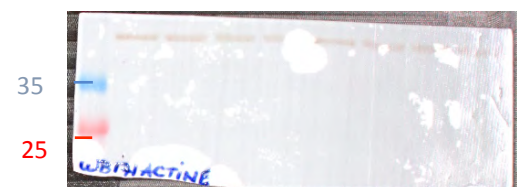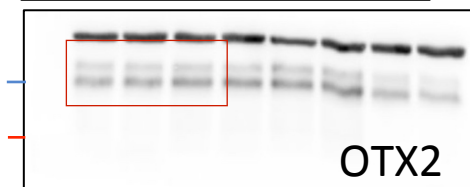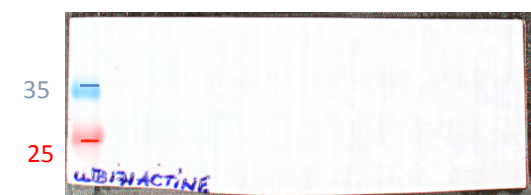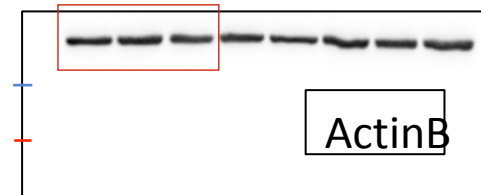

# PDX4\_Ab\_WB99

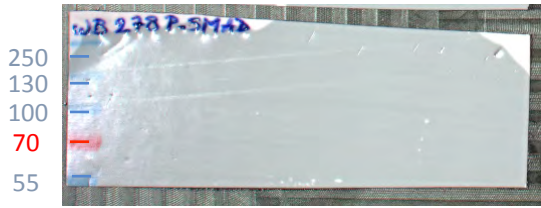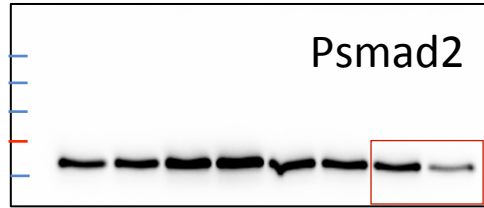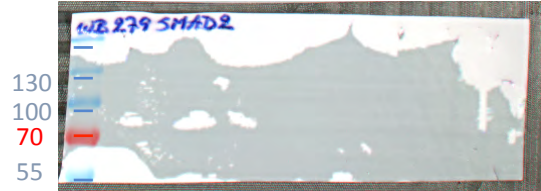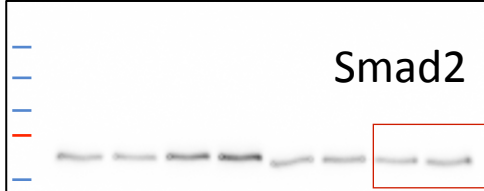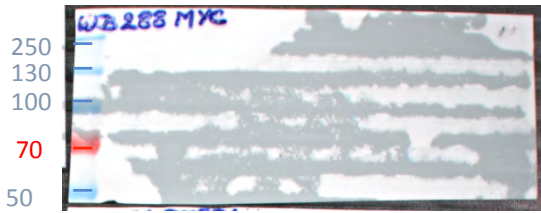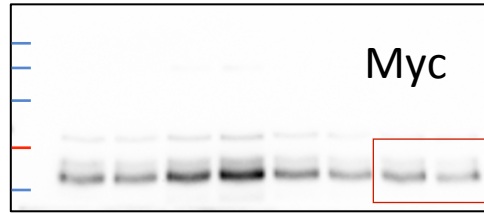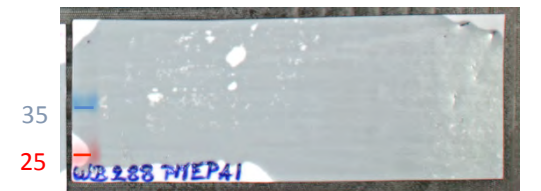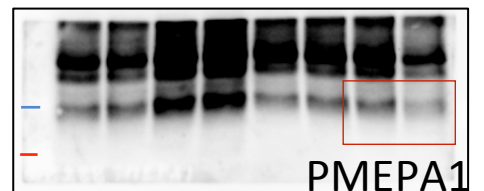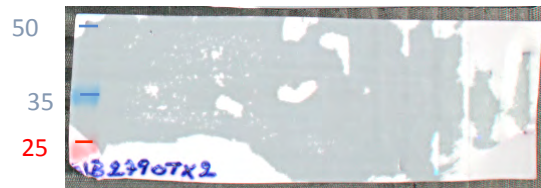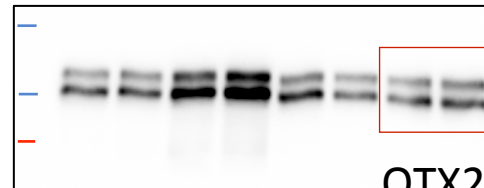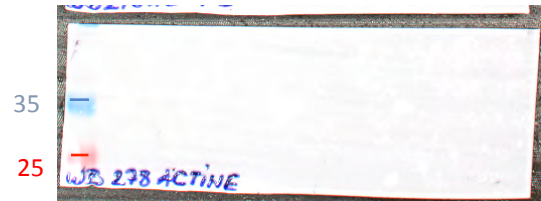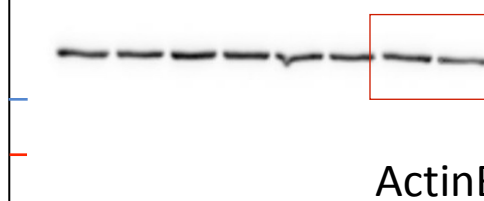



# -PDX4\_FLST\_WB99

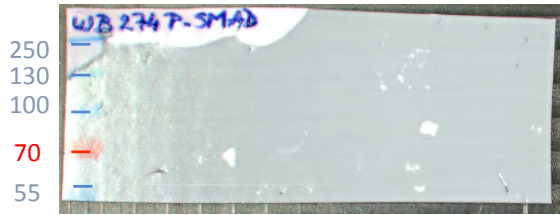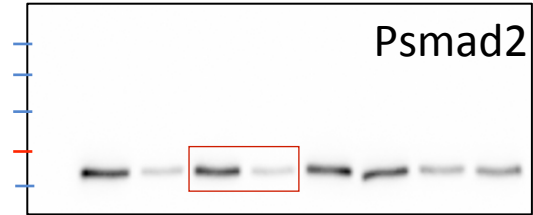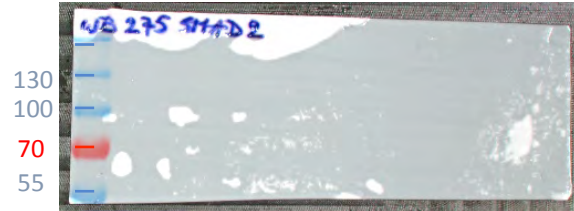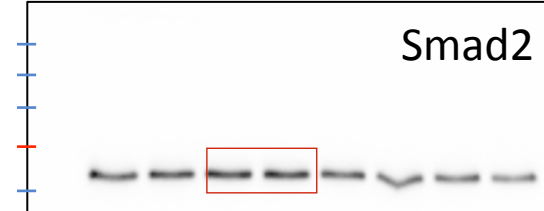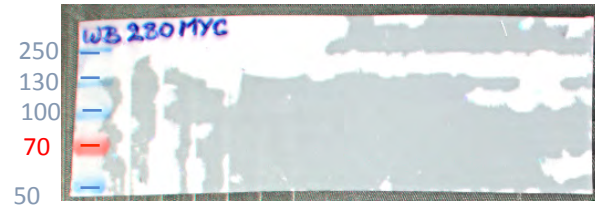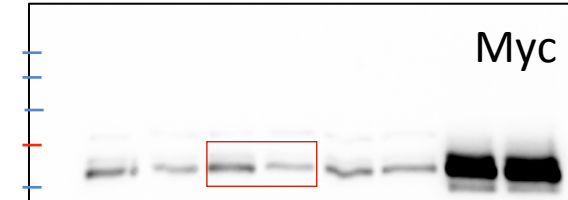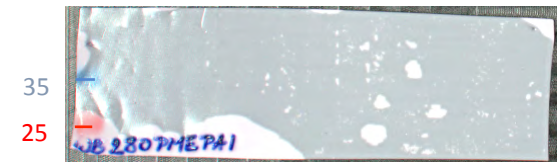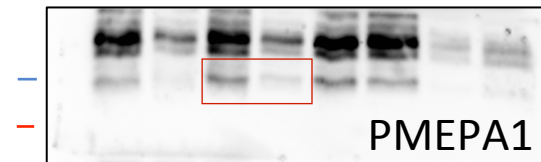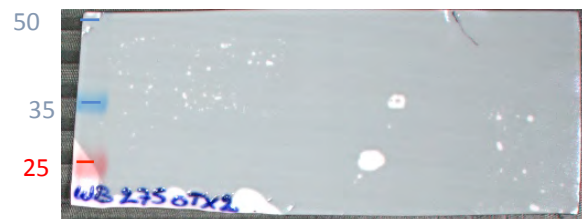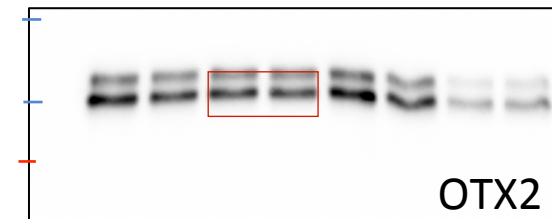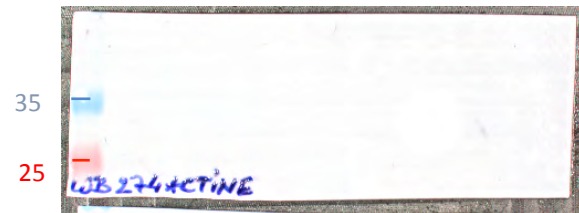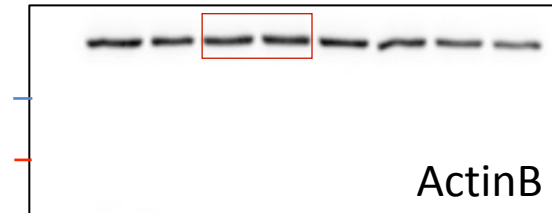

# PDX3\_DLS WB68

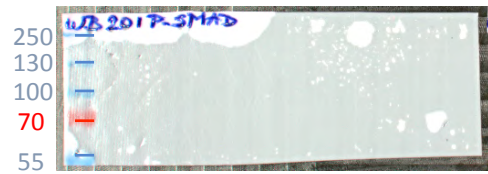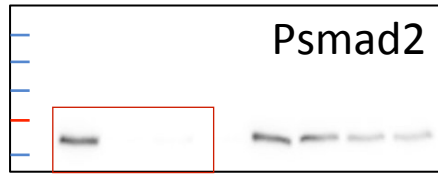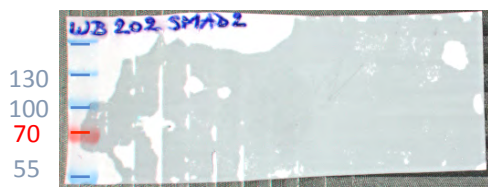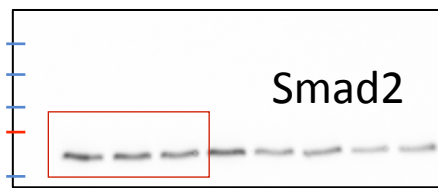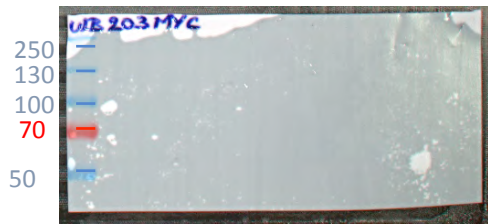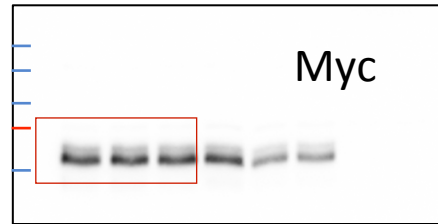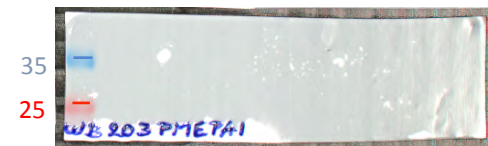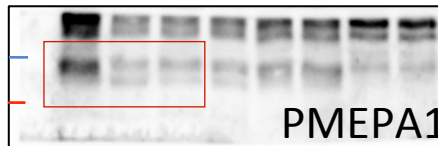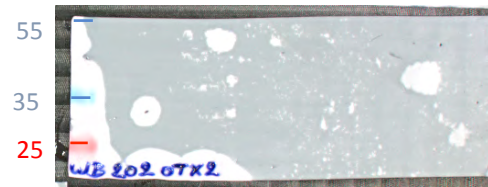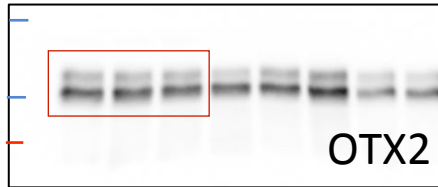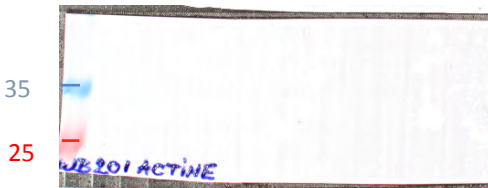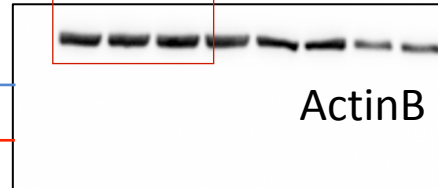

# PDX3\_PA WB108

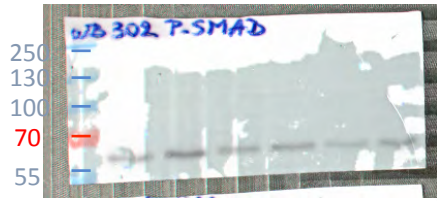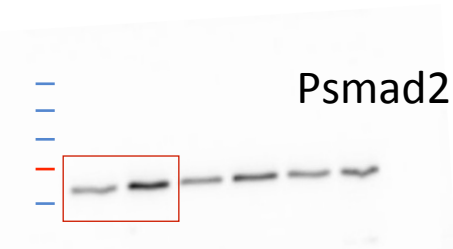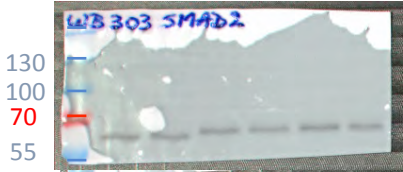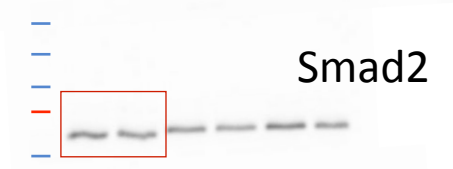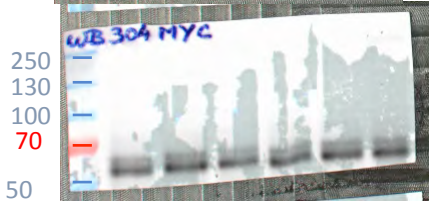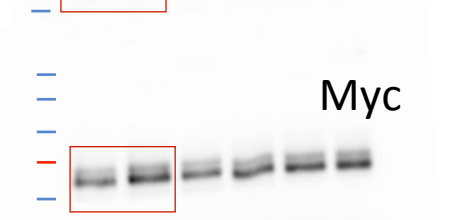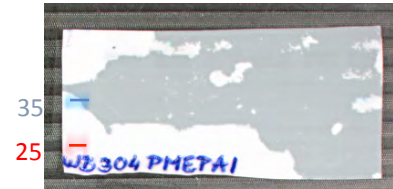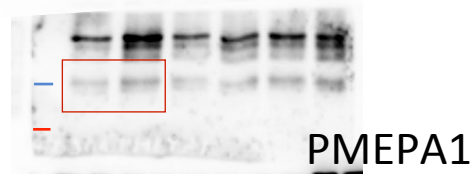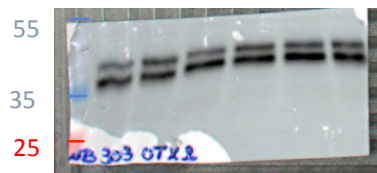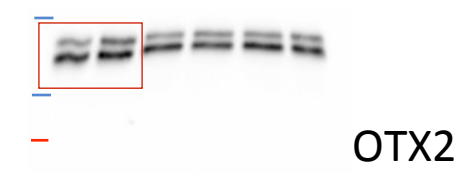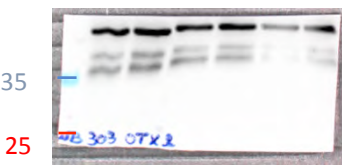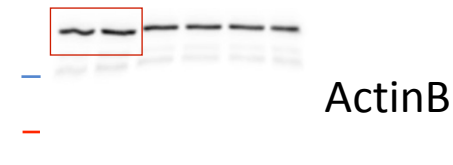

# PDX7\_DLS\_WB40

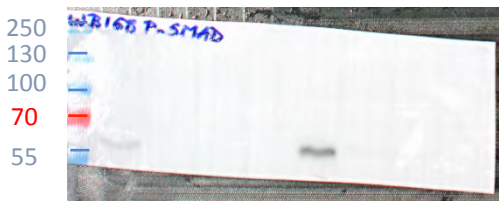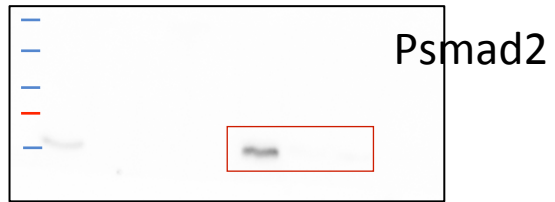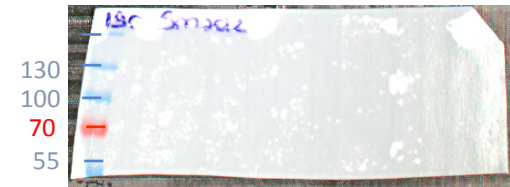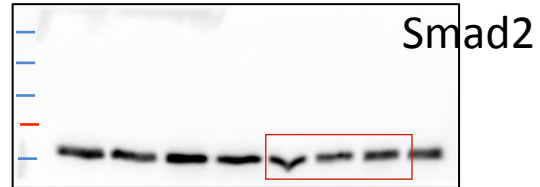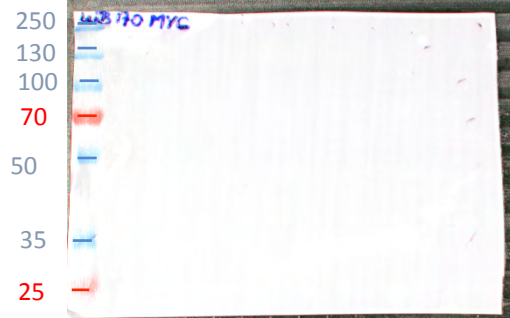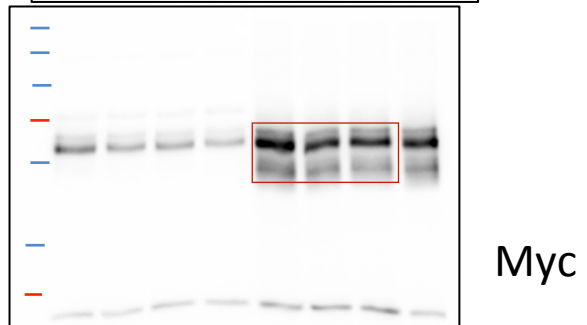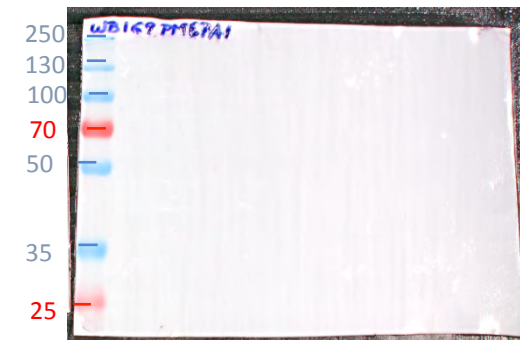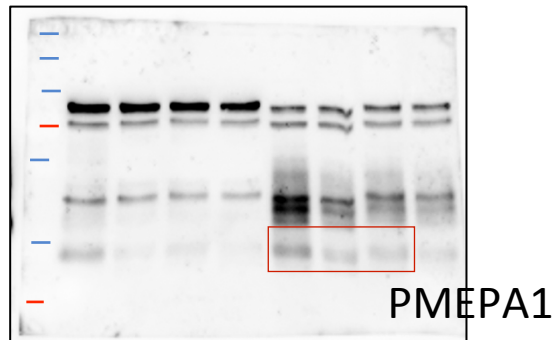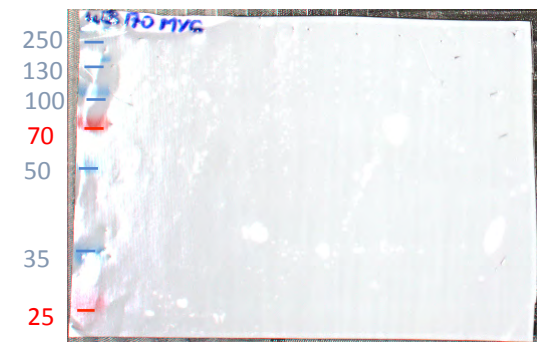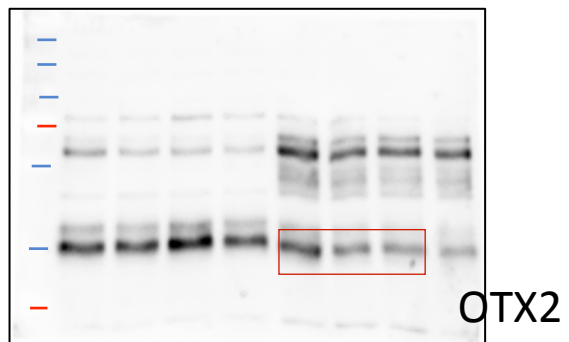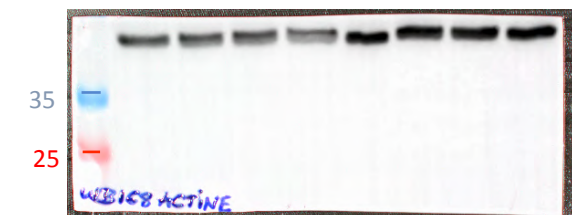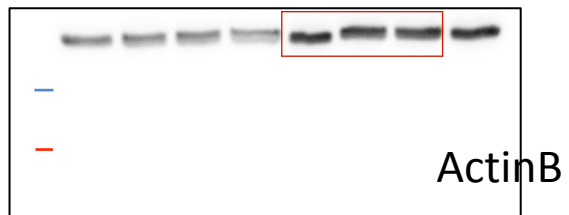



# PDX7\_PA\_WB40

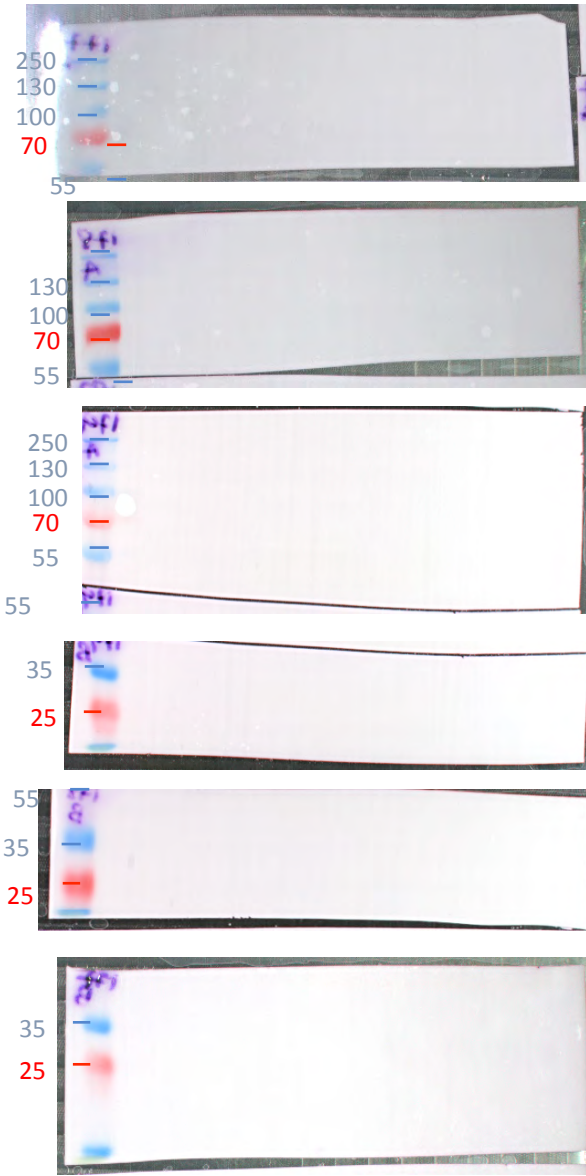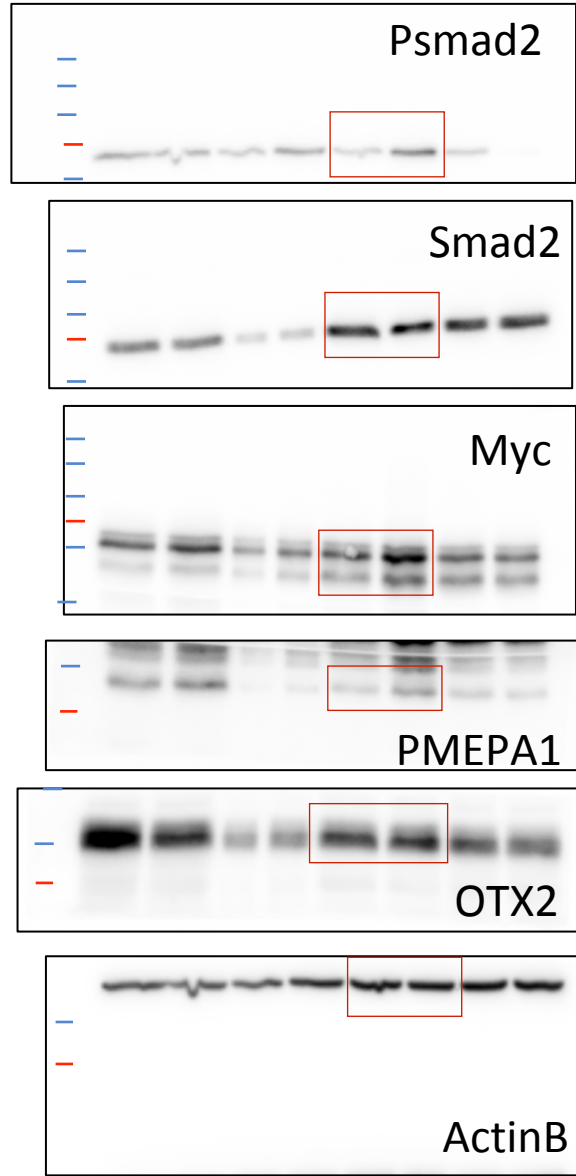

Supplement: EMMM-11-e9830-s008.pdf [file EMMM-11-e9830-s008.pdf]
