# Supplementary material for: An autocrine ActivinB mechanism drives TGFβ/Activin signaling in Group 3 medulloblastoma
Source: PubMed Central journal article supplement (PMC6685082; doi:10.15252/emmm.201809830), 2019-07-22
Supplement: EMMM-11-e9830-s001.pdf [file EMMM-11-e9830-s001.pdf]

# **An autocrine ActivinB mechanism drives TGFβ/Activin signaling in Group 3 medulloblastoma.**

Morgane Morabito, Magalie Larcher, Florence M.G. Cavalli, Chloé Foray, Antoine Forget, Liliana Mirabal-Ortega, Mamy Jean De Dieu Andrianteranagna, Sabine Druillennec, Alexandra Garancher, Julien Masliah-Planchon, Sophie Leboucher, Abel Debalkew, Alessandro Raso, Olivier Delattre, Stéphanie Puget, François Doz, Michael D. Taylor, Olivier Ayrault, Franck Bourdeaut, Alain Eychène, Celio Pouponnot

## **Correspondence:**

Celio POUPONNOT PhD  
Institut Curie - Recherche  
Laboratoire 110, Centre Universitaire  
91405 - ORSAY Cedex, FRANCE  
E-mail : celio.pouponnot@curie.fr  
Tel. 33-1 69 86 30 79  
Fax. 33-1 69 86 30 51

**Running Title:** ActivinB in Group3 medulloblastoma

**Key words:** Medulloblastoma, Activin, TGFbeta, Smad2, Smad3

## **APPENDIX**

### **Table of content**

|                                                                      |           |
|----------------------------------------------------------------------|-----------|
| <b>Appendix Figure S1</b> .....                                      | <b>2</b>  |
| Pharmacological inhibitors and blocking antibody specificity         |           |
| <b>Appendix Figure S2</b> .....                                      | <b>3</b>  |
| ActivinB stimulation does not promote growth in HDMB03 cells         |           |
| <b>Appendix Figure S3</b> .....                                      | <b>4</b>  |
| <i>PMEPA1</i> is a target gene of Activin signaling                  |           |
| <b>Appendix Figure S4</b> .....                                      | <b>5</b>  |
| TGFβ/ActivinB signaling in group 3 MB PDX                            |           |
| <b>Appendix Figure S5</b> .....                                      | <b>6</b>  |
| P-Smad2/Total Smad2 normalization                                    |           |
| <b>Appendix Table S1</b> .....                                       | <b>7</b>  |
| Statistics related to Figure 1B, 5B-C and EV1B                       |           |
| <b>Appendix Table S2</b> .....                                       | <b>8</b>  |
| Statistics related to Figure 1D, 6B and EV1D and Appendix Figure S4A |           |
| <b>Appendix Table S3</b> .....                                       | <b>10</b> |
| Statistics related to Figure 7D-E                                    |           |
| <b>Appendix Table S4</b> .....                                       | <b>13</b> |
| Oligonucleotides used in this study for RT-qPCR experiments          |           |
| <b>Appendix Table S5</b> .....                                       | <b>14</b> |
| Exact p-values and number of replicates for each experiment          |           |
| <b>Appendix Supplemental Figure legends</b> .....                    | <b>20</b> |
| <b>Appendix Supplemental Table legends</b> .....                     | <b>22</b> |

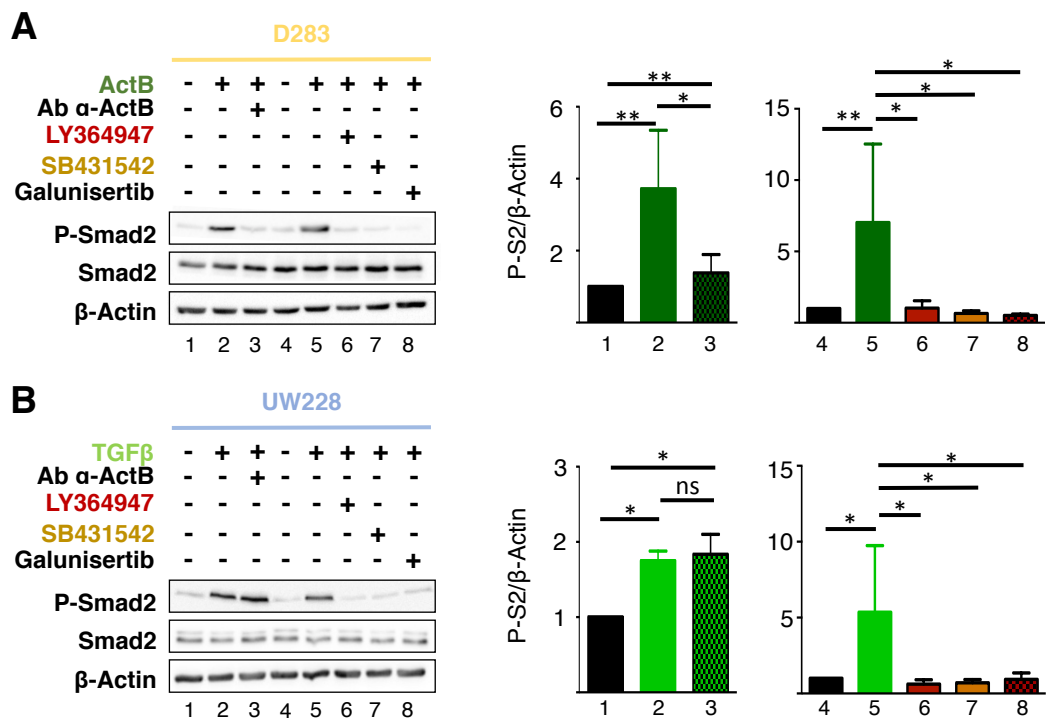

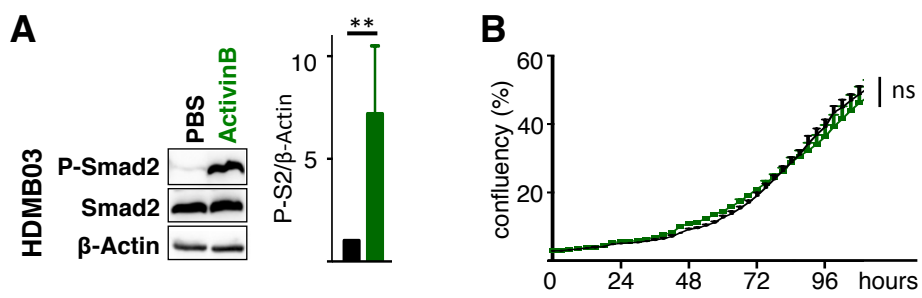

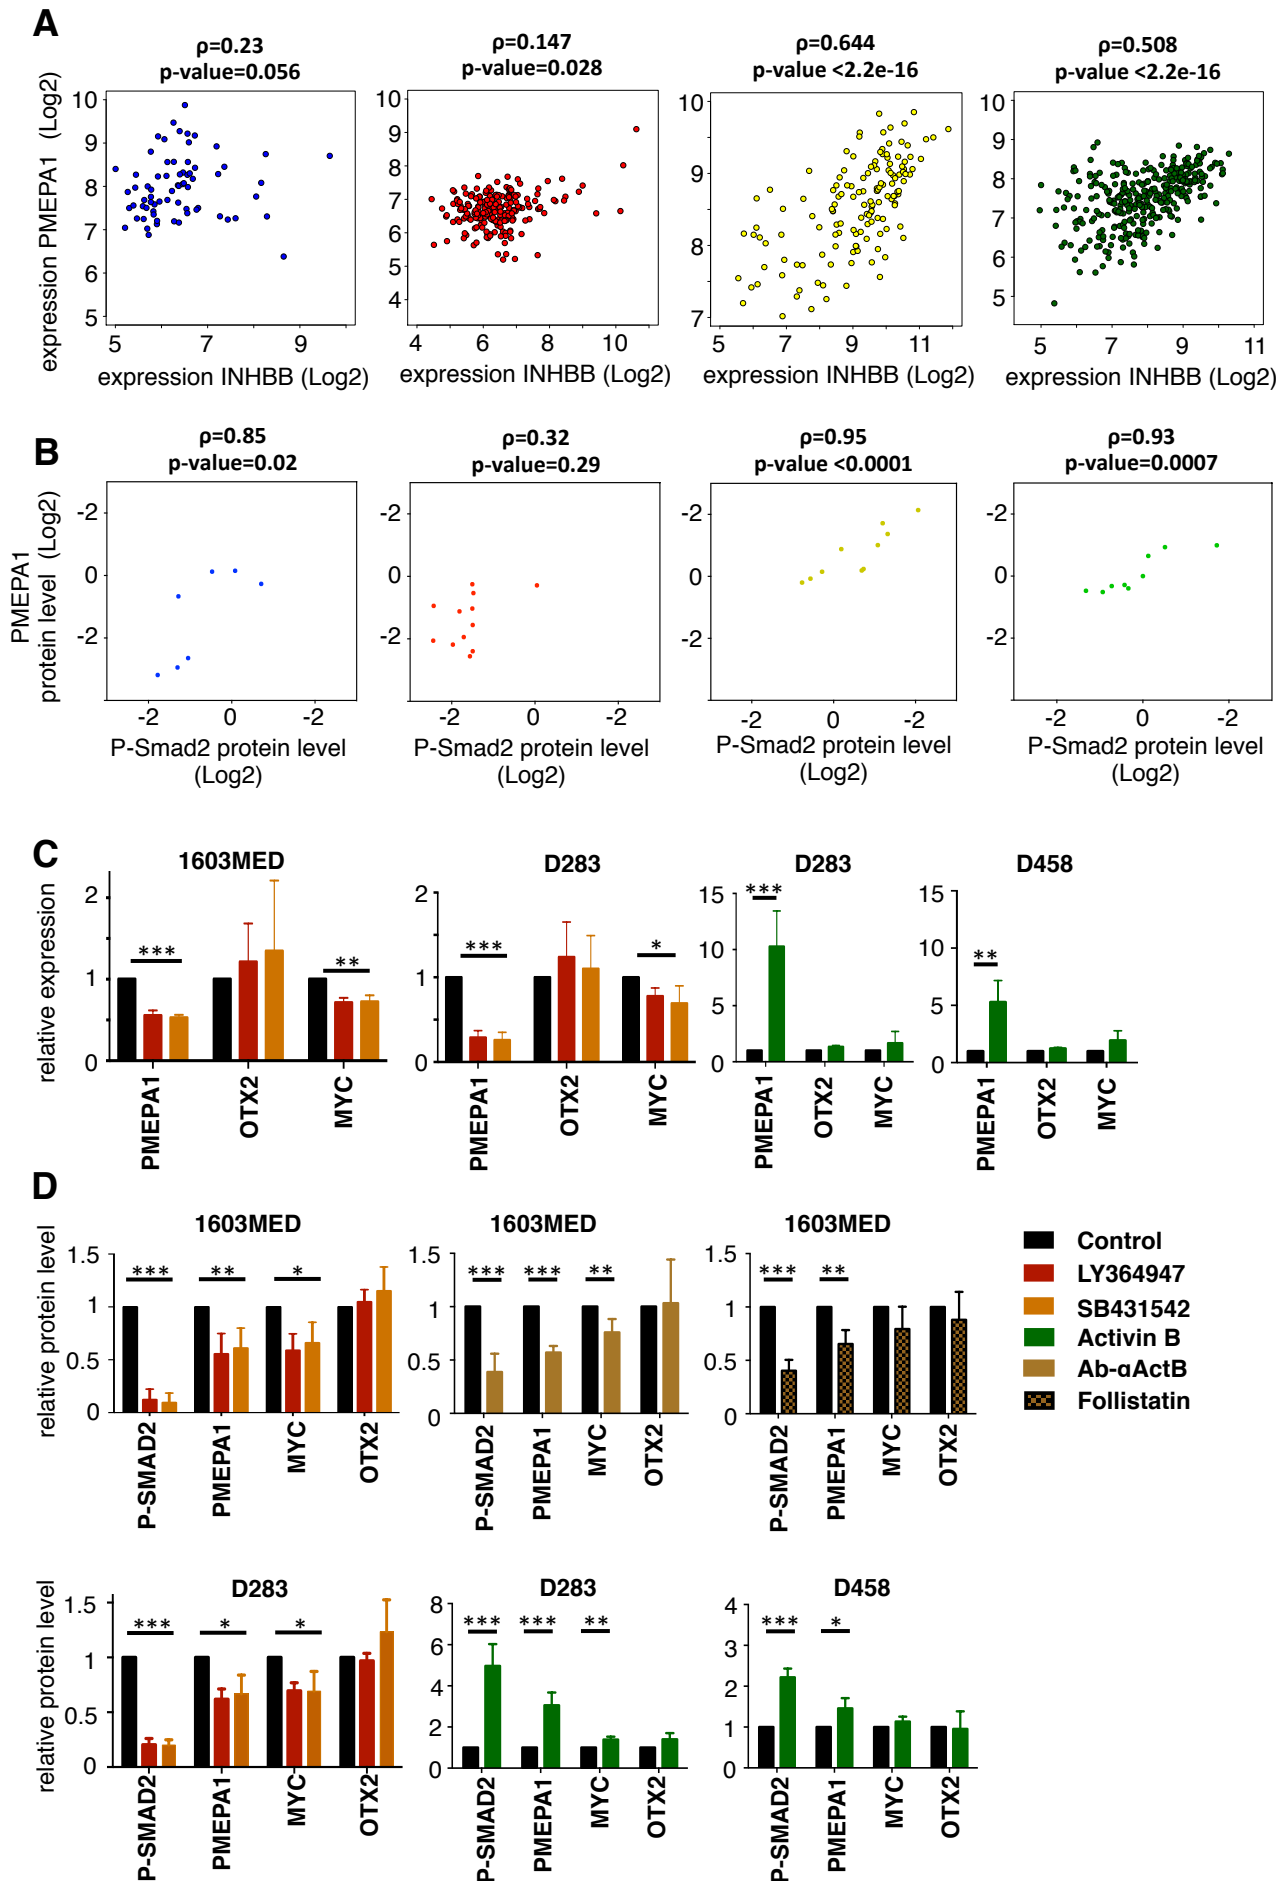

Appendix Figure S3 Morabito et al.

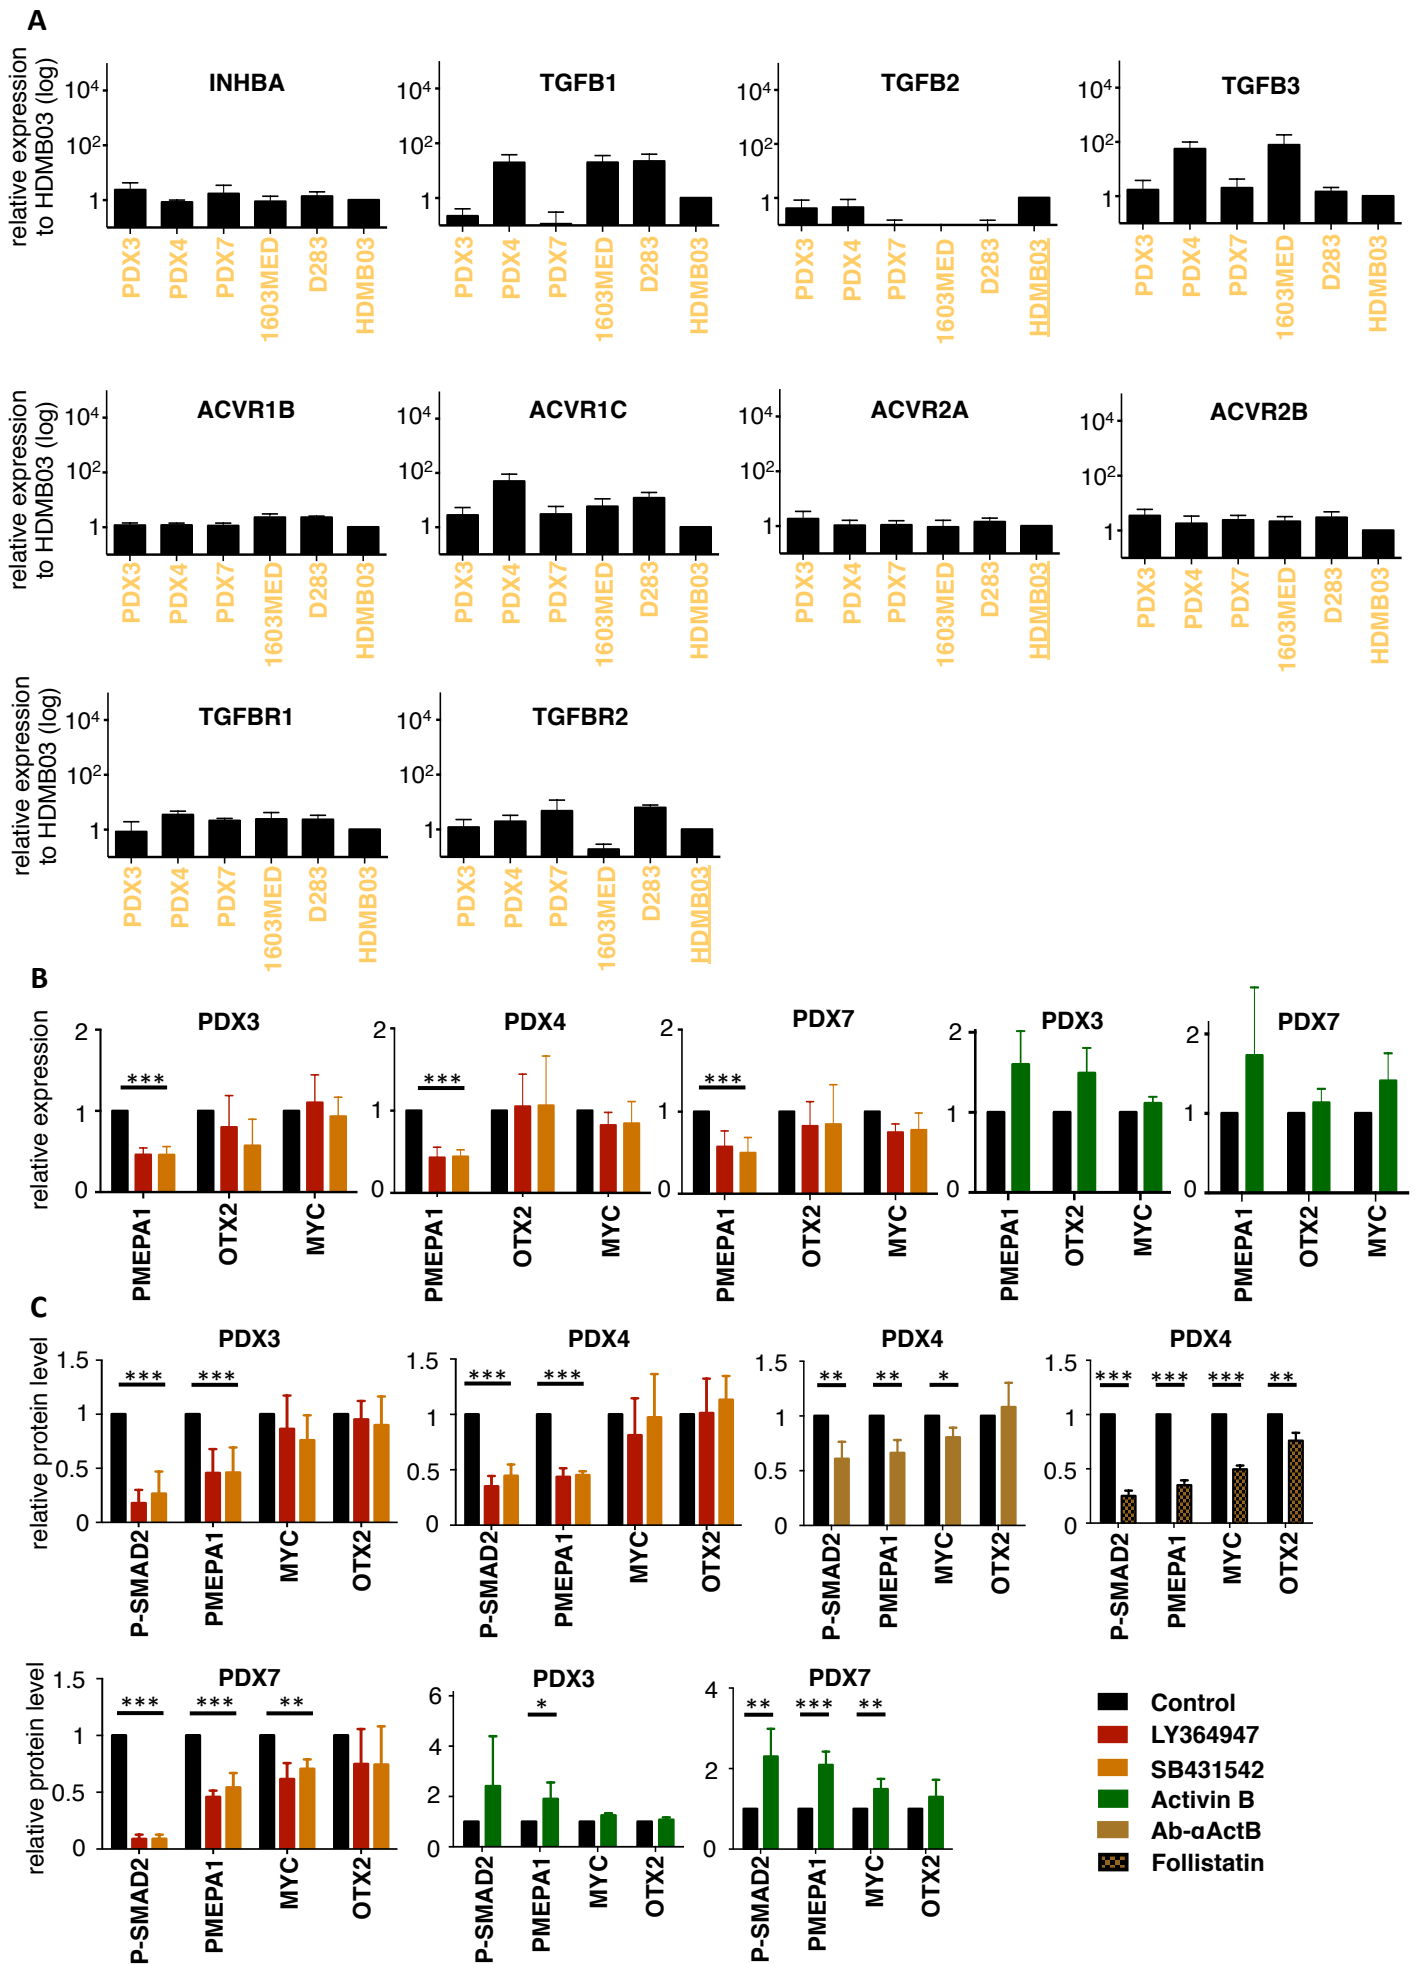

Appendix Figure S4 Morabito et al.

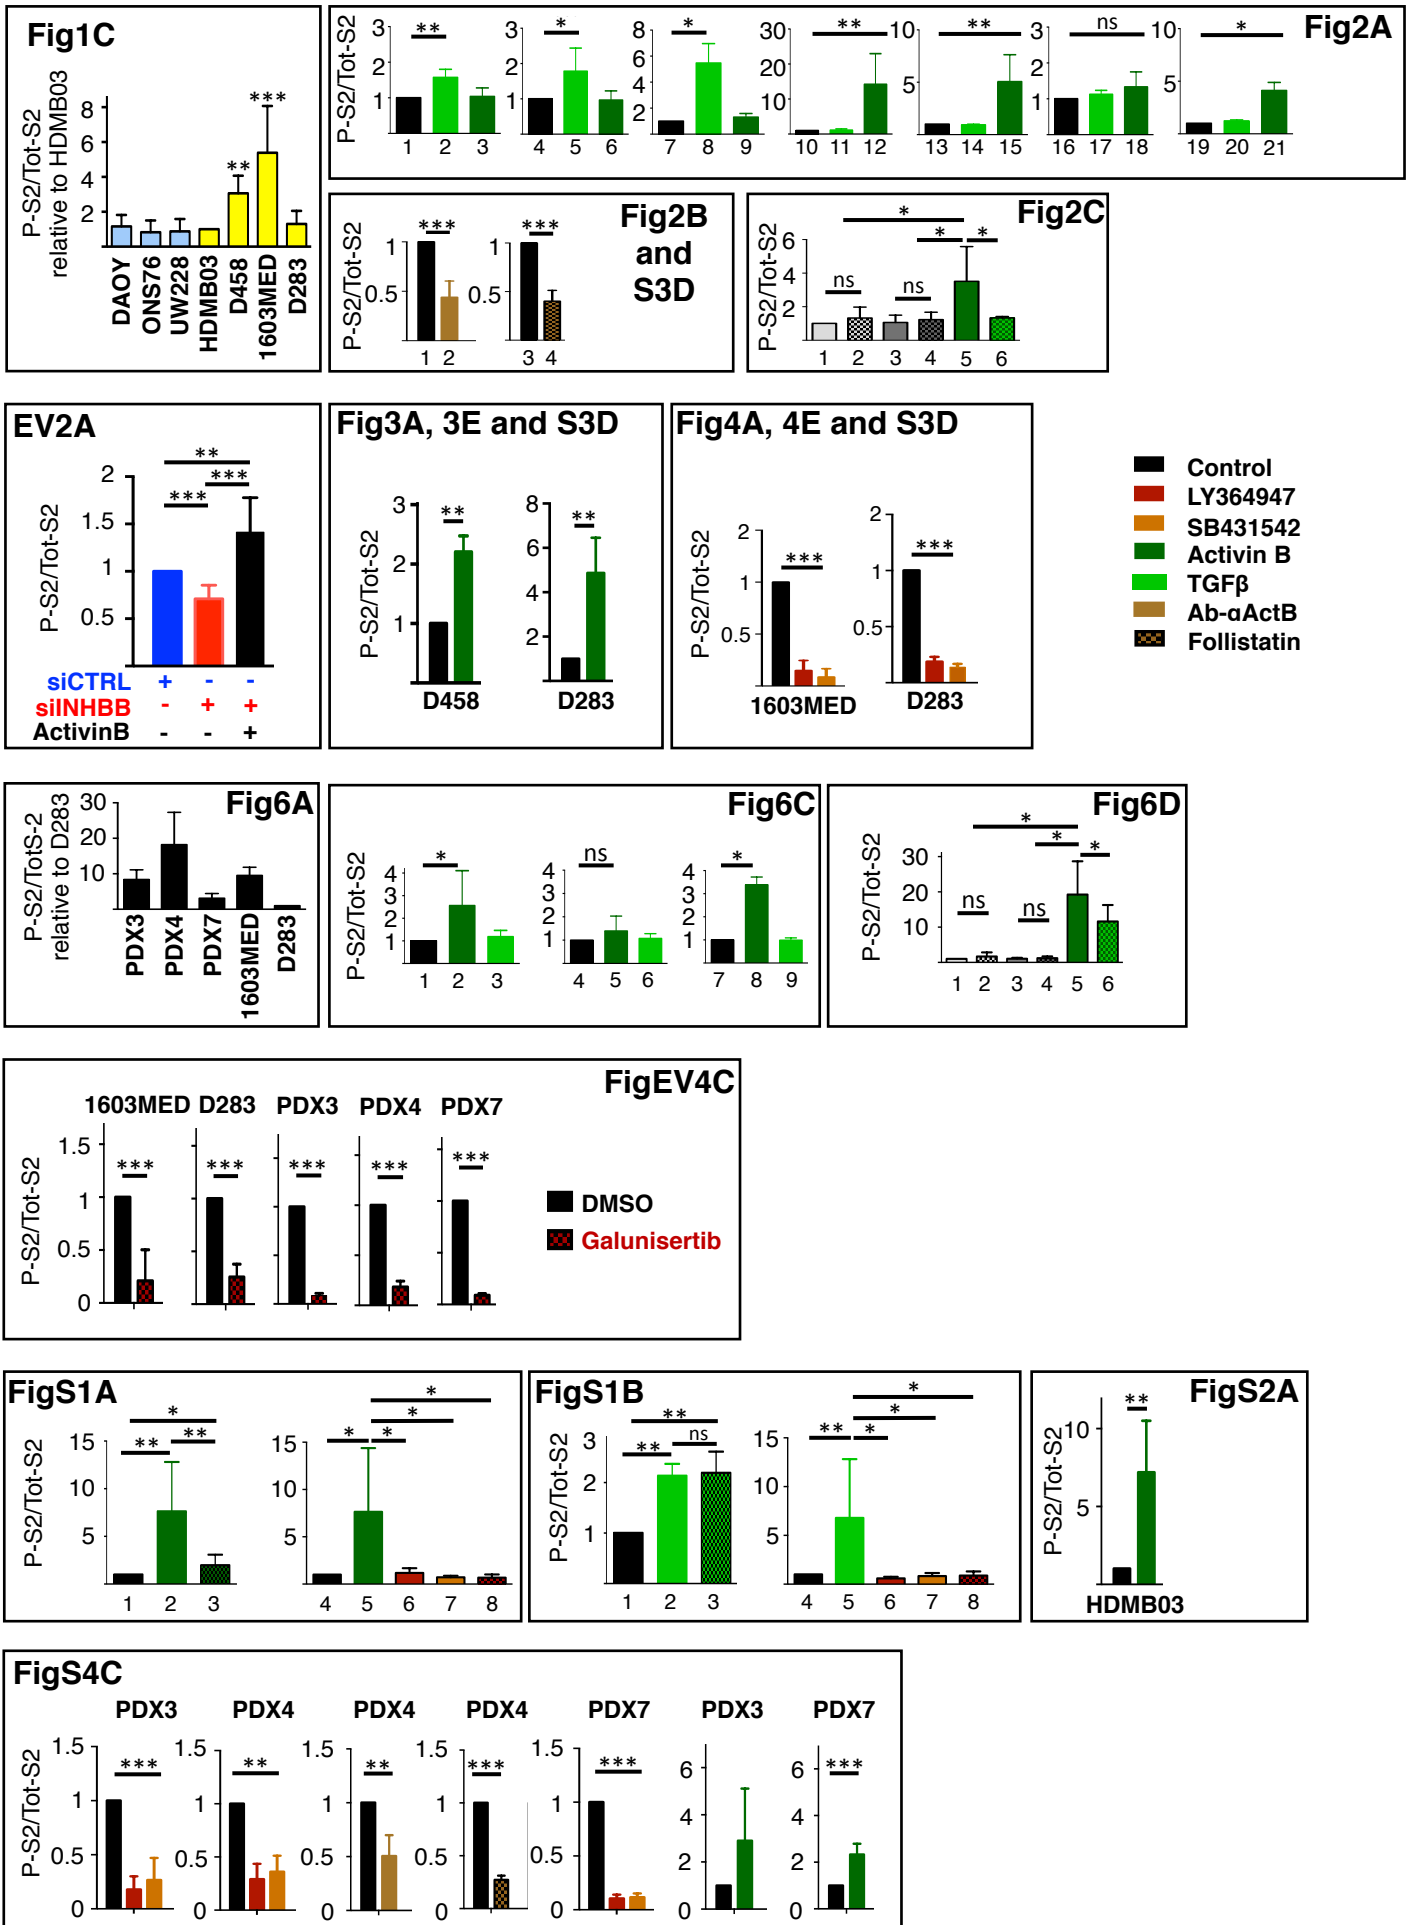

Appendix Figure S5 Morabito et al.

Appendix Table S1: Statistics related to Figure 1B, 5B-C and EV1B-C

| EnsemblGeneID_from_ensemblv77 | HGNC_symbol_from_ensemblv77 | Fetal_vs_Adult | Fetal_vs_WNT | Fetal_vs_SHH | Fetal_vs_Group3 | Fetal_vs_Group4 | Adult_vs_WNT | Adult_vs_SHH | Adult_vs_Group3 | Adult_vs_Group4 | WNT_vs_SHH | WNT_vs_Group3 | WNT_vs_Group4 | SHH_vs_Group3 | SHH_vs_Group4 | Group3_vs_Group4 |
|-------------------------------|-----------------------------|----------------|--------------|--------------|-----------------|-----------------|--------------|--------------|-----------------|-----------------|------------|---------------|---------------|---------------|---------------|------------------|
| ENSG00000115170               | ACVR1                       | 3,884E-01      | 1,612E-05    | 6,816E-01    | 2,037E-05       | 1,028E-06       | 2,430E-04    | 6,780E-01    | 2,630E-04       | 5,034E-05       | 4,800E-21  | 2,229E-03     | 4,420E-13     | 5,162E-36     | 1,790E-70     | 8,397E-08        |
| ENSG00000135503               | ACVR1B                      | 1,758E-02      | 8,258E-02    | 1,912E-01    | 5,173E-01       | 2,695E-01       | 4,618E-02    | 1,376E-02    | 1,798E-03       | 9,235E-03       | 2,350E-01  | 3,459E-06     | 1,040E-01     | 9,013E-07     | 4,947E-01     | 5,530E-06        |
| ENSG00000123612               | ACVR1C                      | 3,996E-04      | 9,815E-01    | 8,410E-02    | 7,331E-04       | 1,086E-03       | 5,447E-05    | 2,961E-04    | 1,488E-04       | 3,745E-05       | 5,568E-05  | 3,093E-12     | 2,650E-13     | 1,272E-03     | 5,893E-03     | 5,086E-02        |
| ENSG00000121989               | ACVR2A                      | 2,238E-01      | 5,610E-03    | 4,118E-01    | 8,875E-02       | 9,503E-02       | 2,141E-01    | 3,162E-01    | 2,641E-03       | 7,426E-01       | 1,537E-07  | 3,003E-17     | 1,415E-04     | 2,047E-12     | 4,944E-03     | 5,338E-22        |
| ENSG00000114739               | ACVR2B                      | 7,592E-03      | 8,258E-02    | 2,736E-05    | 8,103E-06       | 1,361E-04       | 1,747E-03    | 1,412E-04    | 5,978E-05       | 7,374E-05       | 8,417E-17  | 7,595E-16     | 9,334E-09     | 9,321E-01     | 1,241E-11     | 6,276E-09        |
| ENSG00000105329               | TGFB1                       | 5,287E-01      | 6,769E-03    | 4,626E-01    | 3,768E-05       | 5,878E-03       | 4,772E-03    | 1,315E-01    | 2,099E-04       | 2,043E-03       | 1,823E-08  | 1,502E-06     | 1,507E-01     | 1,123E-33     | 2,807E-14     | 7,348E-19        |
| ENSG00000092969               | TGFB2                       | 3,996E-04      | 1,315E-06    | 7,381E-01    | 7,385E-07       | 3,113E-07       | 3,308E-03    | 8,260E-04    | 2,021E-04       | 5,128E-05       | 3,763E-31  | 8,823E-02     | 4,705E-04     | 1,431E-52     | 5,499E-83     | 5,104E-02        |
| ENSG00000119699               | TGFB3                       | 3,596E-02      | 1,173E-01    | 2,294E-02    | 9,169E-04       | 8,151E-04       | 2,609E-02    | 5,934E-01    | 7,752E-04       | 4,722E-04       | 2,240E-12  | 1,771E-06     | 6,814E-05     | 5,093E-37     | 1,697E-53     | 1,557E-02        |
| ENSG00000106799               | TGFB1                       | 6,070E-01      | 1,217E-06    | 4,208E-03    | 4,854E-06       | 2,178E-06       | 5,447E-05    | 1,750E-02    | 1,546E-04       | 1,468E-04       | 2,216E-21  | 7,840E-01     | 1,134E-18     | 1,035E-24     | 3,682E-10     | 4,587E-18        |
| ENSG00000163513               | TGFB2                       | 6,070E-01      | 4,731E-01    | 6,637E-04    | 2,370E-01       | 3,435E-01       | 5,063E-01    | 4,033E-03    | 4,014E-01       | 3,895E-01       | 8,106E-13  | 4,297E-03     | 1,145E-01     | 1,966E-26     | 1,175E-13     | 4,002E-07        |
| ENSG00000123999               | INHA                        | 2,557E-02      | 9,446E-01    | 1,651E-01    | 4,637E-01       | 2,680E-01       | 1,563E-02    | 1,078E-01    | 6,213E-02       | 8,253E-02       | 7,322E-03  | 2,297E-01     | 2,855E-02     | 1,503E-01     | 3,706E-01     | 3,845E-01        |
| ENSG00000163083               | INHBB                       | 3,996E-04      | 1,441E-03    | 6,395E-04    | 7,069E-05       | 3,719E-03       | 9,309E-01    | 9,328E-01    | 2,941E-04       | 6,805E-04       | 6,397E-01  | 3,310E-24     | 2,190E-20     | 1,811E-42     | 7,130E-45     | 3,294E-21        |
| ENSG00000175189               | INHBC                       | 3,277E-01      | 2,440E-01    | 1,086E-03    | 1,062E-02       | 5,603E-06       | 1,257E-01    | 4,278E-03    | 1,629E-02       | 2,661E-04       | 4,829E-07  | 2,265E-03     | 2,794E-21     | 1,995E-02     | 3,694E-16     | 4,588E-19        |
| ENSG00000139269               | INHBE                       | 1,810E-01      | 2,476E-02    | 3,598E-02    | 4,926E-01       | 9,624E-01       | 2,850E-01    | 4,010E-01    | 6,915E-02       | 3,564E-02       | 6,009E-01  | 2,229E-03     | 1,239E-06     | 5,082E-06     | 4,354E-14     | 4,792E-02        |
| ENSG00000124225               | PMEDA1                      | 4,955E-02      | 5,112E-05    | 9,011E-05    | 1,014E-06       | 1,510E-02       | 4,082E-04    | 3,673E-04    | 5,511E-05       | 4,226E-03       | 7,182E-03  | 1,931E-08     | 2,922E-05     | 1,842E-31     | 1,533E-02     | 1,003E-37        |

| HGNC_symbol_from_ensemblv77 | WNT_vs_SHH | WNT_vs_Group3 | WNT_vs_Group4 | SHH_vs_Group3 | SHH_vs_Group4 | Group3_vs_Group4 | Group3_vs_WNT_and_SHH_and_Group4 | Group3_alpha_vs_Group3_beta | Group3_alpha_vs_Group3_gamma | Group3_beta_vs_Group3_gamma | Group3_alpha_vs_Group3_beta_and_gamma |
|-----------------------------|------------|---------------|---------------|---------------|---------------|------------------|----------------------------------|-----------------------------|------------------------------|-----------------------------|---------------------------------------|
| ENSG00000124225             | PMEDA1     | 0,0071818     | 1,93E-08      | 2,92E-05      | 1,84E-31      | 0,0153323        | 1,00E-37                         | 1,16E-39                    | 1,38E-08                     | 3,33E-05                    | 0,097734959                           |
| ENSG00000129535             | NRL        | 3,29E-24      | 4,96E-25      | 0,933501491   | 9,73E-58      | 5,68E-41         | 5,41E-35                         | 1,63E-54                    | 5,69E-09                     | 4,74E-09                    | 0,843313181                           |
| ENSG00000136997             | MYC        | 1,05E-35      | 0,0458677     | 2,46E-32      | 6,31E-38      | 0,7007526        | 8,34E-37                         | 2,21E-34                    | 1,04E-08                     | 6,48E-15                    | 1,89E-06                              |
| ENSG00000163083             | INHBB      | 0,6396935     | 3,31E-24      | 2,19E-20      | 1,81E-42      | 7,13E-45         | 3,29E-21                         | 5,33E-38                    | 0,000591146                  | 0,005146791                 | 0,780422424                           |

Statistics related to transcriptomic analyses on data set from Cavalli et al. (Cancer Cell. 2017; 31(6):737-754.e6. doi: 10.1016/j.ccell.2017.05.005.)

| Column ID | p-value(G3 vs. G4) | p-value(G3 vs. SHH) | p-value(G3 vs. WNT) | p-value(G3 vs. G4 and SHH and WNT) | p-value(G4 vs. SHH) | p-value(G4 vs. WNT) | p-value(SHH vs. WNT) | p-value(Group Fused) |
|-----------|--------------------|---------------------|---------------------|------------------------------------|---------------------|---------------------|----------------------|----------------------|
| TGFB1     | 5.35963e-005       | 5.67015e-005        | 0.238964            | 0.000313135                        | 0.858953            | 0.135101            | 0.158415             | 9.4332e-005          |
| TGFB2     | 0.247443           | 1.12487e-006        | 0.75613             | 0.165101                           | 8.55297e-008        | 0.734319            | 0.00134171           | 2.20759e-007         |
| TGFB3     | 0.00180916         | 7.93946e-007        | 0.0601249           | 7.10596e-005                       | 0.0259683           | 0.931655            | 0.148734             | 1.48278e-005         |
| INHBA     | 0.0439173          | 0.00915805          | 9.87976e-005        | 0.0228808                          | 0.359509            | 5.67716e-005        | 3.20652e-005         | 0.000161164          |
| INHBB     | 0.0097442          | 0.00697344          | 0.516205            | 0.0231563                          | 0.999634            | 0.389553            | 0.382804             | 0.0232013            |
| ACVR1B    | 0.116212           | 0.55153             | 0.722947            | 0.895126                           | 0.0313741           | 0.219181            | 0.975419             | 0.150793             |
| ACVR2A    | 0.188444           | 0.104717            | 0.0206685           | 0.0158543                          | 0.79032             | 0.12028             | 0.155643             | 0.0946167            |
| ACVR1C    | 0.750199           | 0.30014             | 0.846786            | 0.548559                           | 0.473682            | 0.99339             | 0.648938             | 0.75337              |
| TGFB2     | 0.0604814          | 0.0676761           | 0.547578            | 0.086931                           | 0.881089            | 0.369556            | 0.416615             | 0.186227             |

Statistics related to proteomic analyses

**Appendix Table S2: statistics related to Figure 1D, 6B and EV1D and Appendix Figure S4A**

| <b>TGFBR1 - ANOVA</b>                | pvalue |
|--------------------------------------|--------|
| non group3 vs. group3 cell lines     | 0,011  |
| non group3 cell lines vs. group3 PDX | 0,0077 |
| group3 cell lines vs. group3 PDX     | 0,6685 |

Fig EV1

Appendix Figure S4

| <b>TGFBR2 - ANOVA</b>                | pvalue   |
|--------------------------------------|----------|
| non group3 vs. group3 cell lines     | < 0,0001 |
| non group3 cell lines vs. group3 PDX | < 0,0001 |
| group3 cell lines vs. group3 PDX     | 0,9714   |

Fig EV1

Appendix Figure S4

| <b>ACVR2A - ANOVA</b>                | pvalue |
|--------------------------------------|--------|
| non group3 vs. group3 cell lines     | 0,0147 |
| non group3 cell lines vs. group3 PDX | 0,0038 |
| group3 cell lines vs. group3 PDX     | 0,5366 |

Fig EV1

Appendix Figure S4

| <b>ACVR2B - ANOVA</b>                | pvalue |
|--------------------------------------|--------|
| non group3 vs. group3 cell lines     | 0,0003 |
| non group3 cell lines vs. group3 PDX | 0,0009 |
| group3 cell lines vs. group3 PDX     | 0,762  |

Fig EV1

Appendix Figure S4

| <b>ACVR1B - ANOVA</b>                | pvalue   |
|--------------------------------------|----------|
| non group3 vs. group3 cell lines     | < 0,0001 |
| non group3 cell lines vs. group3 PDX | < 0,0001 |
| group3 cell lines vs. group3 PDX     | < 0,0001 |

Fig EV1

Appendix Figure S4

| <b>ACVR1C - ANOVA</b>                | pvalue |
|--------------------------------------|--------|
| non group3 vs. group3 cell lines     | 0,7806 |
| non group3 cell lines vs. group3 PDX | 0,0623 |
| group3 cell lines vs. group3 PDX     | 0,049  |

Fig EV1

Appendix Figure S4

| <b>INHBA - ANOVA</b>                 | pvalue |
|--------------------------------------|--------|
| non group3 vs. group3 cell lines     | 0,0038 |
| non group3 cell lines vs. group3 PDX | 0,0184 |
| group3 cell lines vs. group3 PDX     | 0,9993 |

Fig EV1

Appendix Figure S4



| <b>INHBB - ANOVA</b>                 | pvalue |                    |
|--------------------------------------|--------|--------------------|
| non group3 vs. group3 cell lines     | 0,2775 | Figure 1           |
| non group3 cell lines vs. group3 PDX | 0,1975 |                    |
| group3 cell lines vs. group3 PDX     | 0,6649 | Appendix Figure S4 |

| <b>INHBB - non parametric t-test</b> | pvalue   |          |
|--------------------------------------|----------|----------|
| MED1603 vs. non group3               | 0,0016   | Figure 1 |
| MED1603 vs. D283                     | 0,0079   | Figure 1 |
| D283 vs. non group3                  | 0,0016   | Figure 1 |
| HDMB03 vs. non group3                | > 0,9999 | Figure 1 |
| D458 vs. non group3                  | 0,0917   | Figure 1 |

| <b>TGFB1 - ANOVA</b>                 | pvalue |                    |
|--------------------------------------|--------|--------------------|
| non group3 vs. group3 cell lines     | 0,6167 | Fig EV1            |
| non group3 cell lines vs. group3 PDX | 0,0949 |                    |
| group3 cell lines vs. group3 PDX     | 0,1494 | Appendix Figure S4 |

| <b>TGFB2 - ANOVA</b>                 | pvalue   |                    |
|--------------------------------------|----------|--------------------|
| non group3 vs. group3 cell lines     | < 0,0001 | Fig EV1            |
| non group3 cell lines vs. group3 PDX | < 0,0001 |                    |
| group3 cell lines vs. group3 PDX     | 0,9982   | Appendix Figure S4 |

| <b>TGFB3 - ANOVA</b>                 | pvalue |                    |
|--------------------------------------|--------|--------------------|
| non group3 vs. group3 cell lines     | 0,5274 | Figure 1           |
| non group3 cell lines vs. group3 PDX | 0,3898 |                    |
| group3 cell lines vs. group3 PDX     | 0,7561 | Appendix Figure S4 |

| <b>TGFB3 - non parametric t-test</b> | pvalue |          |
|--------------------------------------|--------|----------|
| MED1603 vs. non group3               | 0,029  | Figure 1 |
| MED1603 vs. D283                     | 0,0079 | Figure 1 |
| D283 vs. non group3                  | 0,7443 | Figure 1 |
| HDMB03 vs. non group3                | 0,7483 | Figure 1 |
| D458 vs. non group3                  | 0,2817 | Figure 1 |

Statistics related to RT-qPCR experiments assessing expression levels of the TGF $\beta$ /ActivinB signaling pathway mediators performed in cell lines and PDX

**Appendix Table S3 : Statistics related to Figure 7D-E**

**WNT\_alpha**

|        | PMEPA1       | NRL          | MYC          | INHBB        |
|--------|--------------|--------------|--------------|--------------|
| PMEPA1 | 1            | 0,30255102   | -0,147142857 | 0,238979592  |
| NRL    | 0,30255102   | 1            | 0,101938776  | -0,060102041 |
| MYC    | -0,147142857 | 0,101938776  | 1            | -0,091326531 |
| INHBB  | 0,238979592  | -0,060102041 | -0,091326531 | 1            |

**WNT\_beta**

|        | PMEPA1      | NRL         | MYC         | INHBB       |
|--------|-------------|-------------|-------------|-------------|
| PMEPA1 | 1           | 0,179220779 | 0,437662338 | 0,185714286 |
| NRL    | 0,179220779 | 1           | 0,546753247 | 0,227272727 |
| MYC    | 0,437662338 | 0,546753247 | 1           | 0,402597403 |
| INHBB  | 0,185714286 | 0,227272727 | 0,402597403 | 1           |

**SHH\_alpha**

|        | PMEPA1      | NRL         | MYC         | INHBB       |
|--------|-------------|-------------|-------------|-------------|
| PMEPA1 | 1           | 0,046940559 | 0,22736014  | 0,145847902 |
| NRL    | 0,046940559 | 1           | 0,089554196 | 0,102797203 |
| MYC    | 0,22736014  | 0,089554196 | 1           | 0,340078671 |
| INHBB  | 0,145847902 | 0,102797203 | 0,340078671 | 1           |

**SHH\_beta**

|        | PMEPA1       | NRL          | MYC          | INHBB       |
|--------|--------------|--------------|--------------|-------------|
| PMEPA1 | 1            | 0,013445378  | -0,078711485 | 0,336414566 |
| NRL    | 0,013445378  | 1            | -0,220728291 | 0,060784314 |
| MYC    | -0,078711485 | -0,220728291 | 1            | 0,125210084 |
| INHBB  | 0,336414566  | 0,060784314  | 0,125210084  | 1           |

**SHH\_gamma**

|        | PMEPA1       | NRL          | MYC         | INHBB        |
|--------|--------------|--------------|-------------|--------------|
| PMEPA1 | 1            | -0,062095282 | 0,041859389 | 0,068917669  |
| NRL    | -0,062095282 | 1            | 0,142807586 | -0,143038853 |
| MYC    | 0,041859389  | 0,142807586  | 1           | 0,473982424  |
| INHBB  | 0,068917669  | -0,143038853 | 0,473982424 | 1            |

**SHH\_delta**

|        | PMEPA1       | NRL          | MYC          | INHBB       |
|--------|--------------|--------------|--------------|-------------|
| PMEPA1 | 1            | -0,073766234 | -0,020041012 | 0,191442242 |
| NRL    | -0,073766234 | 1            | 0,034531784  | 0,049405332 |
| MYC    | -0,020041012 | 0,034531784  | 1            | 0,159289132 |
| INHBB  | 0,191442242  | 0,049405332  | 0,159289132  | 1           |

**Group3\_alpha**

|        | PMEPA1       | NRL          | MYC          | INHBB        |
|--------|--------------|--------------|--------------|--------------|
| PMEPA1 | 1            | -0,204725038 | 0,235174395  | 0,618844281  |
| NRL    | -0,204725038 | 1            | -0,074068162 | -0,087437146 |
| MYC    | 0,235174395  | -0,074068162 | 1            | 0,300782185  |
| INHBB  | 0,618844281  | -0,087437146 | 0,300782185  | 1            |

**Group3\_beta**

|        | PMEPA1       | NRL          | MYC          | INHBB       |
|--------|--------------|--------------|--------------|-------------|
| PMEPA1 | 1            | -0,076813656 | 0,1628734    | 0,404931247 |
| NRL    | -0,076813656 | 1            | -0,183499289 | 0,057373163 |
| MYC    | 0,1628734    | -0,183499289 | 1            | 0,257230915 |
| INHBB  | 0,404931247  | 0,057373163  | 0,257230915  | 1           |

**Group3\_gamma**

|        | PMEPA1       | NRL          | MYC          | INHBB        |
|--------|--------------|--------------|--------------|--------------|
| PMEPA1 | 1            | 0,169043152  | -0,181050657 | 0,650469043  |
| NRL    | 0,169043152  | 1            | -0,416322702 | 0,428705441  |
| MYC    | -0,181050657 | -0,416322702 | 1            | -0,166041276 |
| INHBB  | 0,650469043  | 0,428705441  | -0,166041276 | 1            |

**Group4\_alpha**

|        | PMEPA1      | NRL         | MYC          | INHBB        |
|--------|-------------|-------------|--------------|--------------|
| PMEPA1 | 1           | 0,145853655 | 0,143188672  | 0,314729453  |
| NRL    | 0,145853655 | 1           | 0,149704493  | 0,362469636  |
| MYC    | 0,143188672 | 0,149704493 | 1            | -0,044546028 |
| INHBB  | 0,314729453 | 0,362469636 | -0,044546028 | 1            |

**Group4\_beta**

|        | PMEPA1      | NRL         | MYC         | INHBB       |
|--------|-------------|-------------|-------------|-------------|
| PMEPA1 | 1           | 0,280530071 | 0,455472153 | 0,445436011 |
| NRL    | 0,280530071 | 1           | 0,11225095  | 0,251617088 |
| MYC    | 0,455472153 | 0,11225095  | 1           | 0,208655361 |
| INHBB  | 0,445436011 | 0,251617088 | 0,208655361 | 1           |

**Group4\_gamma**

|        | PMEPA1      | NRL         | MYC         | INHBB       |
|--------|-------------|-------------|-------------|-------------|
| PMEPA1 | 1           | 0,056167213 | 0,398632673 | 0,451830224 |
| NRL    | 0,056167213 | 1           | 0,011551061 | 0,117426293 |
| MYC    | 0,398632673 | 0,011551061 | 1           | 0,14766415  |
| INHBB  | 0,451830224 | 0,117426293 | 0,14766415  | 1           |

INHBB-NRL

| Group  | cor (spearman) | p-value     |
|--------|----------------|-------------|
| WNT    | 0,042183536    | 0,728234249 |
| SHH    | 0,019611259    | 0,770696687 |
| Group3 | 0,302829355    | 0,000239812 |
| Group4 | 0,514738041    | 0           |
| G3a    | -0,087437146   | 0,480779646 |
| G3b    | 0,057373163    | 0,735153304 |
| G3g    | 0,428705441    | 0,006173715 |

Spearman correlation ( $\rho$  and p-values) related to the analyses performed on data set from Cavalli et al. (Cancer Cell. 2017; 31(6):737-754.e6. doi: 10.1016/j.ccell.2017.05.005.) for *INHBB*, *PMEPA1*, *MYC* and *NRL*.

Appendix Table S4

| gene     | Forward (F)/Reverse (R) | sequences (human)    |
|----------|-------------------------|----------------------|
| ACVR1B   | F                       | CTGTTCCCACTCAGCAGTGA |
|          | R                       | AAAGGGCCCTAGAGCAAAAA |
| ACVR1C   | F                       | TGCCACAATATCGGGTACAA |
|          | R                       | CTCTTCCCCCACACTCAC   |
| ACVR2A   | F                       | ACACAGCCCCTTCAAATCC  |
|          | R                       | AGGAGGGTAGGCCATCTTGT |
| ACVR2B   | F                       | CACTGGCAGACTGGAGTCAA |
|          | R                       | TCCTCCAATCCACAAGAAG  |
| GAPDH    | F                       | GGTCTCCTCTGACTTCAACA |
|          | R                       | AGCCAAATTCGTTGTCATAC |
| INHBA    | F                       | CTTGAGGTTCCCTTGTGAGC |
|          | R                       | GGGTAGGAAAGTGCTGTGA  |
| INHBB    | F                       | GTGACAGGTGGAACATGGTG |
|          | R                       | TGCACGTCTAGGTTGAGTCG |
| MYC      | F                       | GAGGCTATTCTGCCATTTG  |
|          | R                       | AGGCTGCTGGTTTTCCACTA |
| OTX2     | F                       | CCCACTGTCAGATCCCTTGT |
|          | R                       | ATGCCCCAAAGTAGGAAGT  |
| PMEPA1   | F                       | TTTCCATCTCCTTTCCCCGC |
|          | R                       | CCCGCCAACCCCAAATCTAT |
| TGFB1    | F                       | CAACAATTCCTGGCGATACC |
|          | R                       | CTAAGGCGAAAGCCCTCAAT |
| TGFB2    | F                       | ATCCCCTGTAGCCCCATAAC |
|          | R                       | GGCAAGTAGCTGATCCCAAA |
| TGFB3    | F                       | CCTCTTTCCAGCTCACAC   |
|          | R                       | AATGGCTTCCACCCTCTTCT |
| TGFBRI   | F                       | CAGCTCTGGTTGGTGTGAGA |
|          | R                       | ATGTGAAGATGGGCAAGACC |
| TGFBRII  | F                       | TTTTGTTTGGTCAGCACAGC |
|          | R                       | TTTTGTGAACGTGGACTGGA |
| TGFBRIII | F                       | CAGTCCACATCCACCACAAG |
|          | R                       | CACAGAACCCTCAGACACCA |

Appendix Table S5 : detailed n and pvalues

| Figure 1         |                       |                    |                       |                      |               |             |     |
|------------------|-----------------------|--------------------|-----------------------|----------------------|---------------|-------------|-----|
| Figure 1C        | n=7 per group         |                    |                       |                      |               |             |     |
| DAOY             | non group3 vs HDMB03  | non group3 vs D458 | non group3 vs MED1603 | non group3 vs D283   |               |             |     |
| Psmad2/Actin     | 0,0135                | < 0,0001           | < 0,0001              | 0,0002               |               |             |     |
|                  | D283 vs MED1603       | D283 vs D458       | D283 vs HDMB03        | D283 vs DAOY         | D283 vs ONS76 | D283 vs UW  |     |
|                  | 0,0006                | 0,5221             | 0,0169                | 0,0041               | 0,007         | 0,0041      |     |
|                  | MED1603 vs D458       | MED1603 vs HDMB03  | MED1603 vs DAOY       | MED1603 vs ONS       | MED1603 vs UW |             |     |
|                  | 0,0006                | 0,0006             | 0,0006                | 0,0006               | 0,0006        |             |     |
|                  | D458 vs HDMB03        | D458 vs DAOY       | D458 vs ONS76         | D458 vs UW           |               |             |     |
|                  | 0,0006                | 0,0006             | 0,0012                | 0,0023               |               |             |     |
|                  | HDMB03 vs DAOY        | HDMB03 vs ONS76    | HDMB03 vs UW          |                      |               |             |     |
|                  | 0,1801                | 0,0169             | 0,0169                |                      |               |             |     |
| Figure 1D        | non group3 vs MED1603 | non group3 vs D283 | non group3 vs D458    | non group3 vs HDMB03 |               |             |     |
| INHBB expression | 0,0016                | 0,0016             | 0,0917                | > 0,9999             |               |             |     |
|                  | non group3 vs MED1603 | non group3 vs D283 | non group3 vs D458    | non group3 vs HDMB03 |               |             |     |
| TGFB3 expression | 0,029                 | 0,7443             | 0,2817                | 0,7483               |               |             |     |
| Figure 2         |                       |                    |                       |                      |               |             |     |
| Figure 2A        |                       |                    |                       |                      |               |             |     |
| DAOY             | TGFb                  | ActB               |                       |                      |               |             | n=5 |
| Psmad2/Actin     | 0,0079                | 0,6825             |                       |                      |               |             |     |
| ONS              | TGFb                  | ActB               |                       |                      |               |             | n=4 |
| Psmad2/Actin     | 0,0286                | > 0,9999           |                       |                      |               |             |     |
| UW               | TGFb                  | ActB               |                       |                      |               |             | n=4 |
| Psmad2/Actin     | 0,0286                | 0,0286             |                       |                      |               |             |     |
| HDMB03           | TGFb                  | ActB               |                       |                      |               |             | n=6 |
| Psmad2/Actin     | 0,0119                | 0,0022             |                       |                      |               |             |     |
| D458             | TGFb                  | ActB               |                       |                      |               |             | n=5 |
| Psmad2/Actin     | 0,1                   | 0,0079             |                       |                      |               |             |     |
| 1603MED          | TGFb                  | ActB               |                       |                      |               |             | n=3 |
| Psmad2/Actin     | 0,7                   | 0,7                |                       |                      |               |             |     |
| D283             | TGFb                  | ActB               |                       |                      |               |             | n=4 |
| Psmad2/Actin     | 0,1                   | 0,0286             |                       |                      |               |             |     |
| Fig 2B           |                       |                    |                       |                      |               |             |     |
| 1603MED          | Ab                    |                    |                       |                      |               |             | n=4 |
| Psmad2/Actin     | 0,000382311           |                    |                       |                      |               |             |     |
|                  | FLST                  |                    |                       |                      |               |             | n=4 |
|                  | 2,2781E-05            |                    |                       |                      |               |             |     |
| Fig 2C           |                       |                    |                       |                      |               |             |     |
| 1603MED          |                       |                    |                       |                      |               |             | n=3 |
| Psmad2/Actin     | NCM vs. NCM+ab        |                    |                       |                      |               | 0,35        |     |
| Psmad2/Actin     | HD-CM vs. HD-CM+ab    |                    |                       |                      |               | 0,2         |     |
| Psmad2/Actin     | 1603-CM vs NCM        |                    |                       |                      |               | 0,05        |     |
| Psmad2/Actin     | 1603-CM vs HD-CM      |                    |                       |                      |               | 0,05        |     |
| Psmad2/Actin     | 1603-CM vs 1603-CM+Ab |                    |                       |                      |               | 0,05        |     |
| Fig 2D           | n=3                   |                    |                       |                      |               |             |     |
| 1603MED          | siCTRL vs. siINHBB    |                    |                       |                      |               |             |     |
| expression       |                       |                    |                       |                      |               | 0,0013      |     |
| Fig 2E           | n=8                   |                    |                       |                      |               |             |     |
| 1603MED          | siCTRL vs. siINHBB    |                    |                       |                      |               |             |     |
| Psmad2/Actin     |                       |                    |                       |                      |               | 5,50897E-06 |     |
| Fig 2F           | n=3                   |                    |                       |                      |               |             |     |
| 1603MED          | siCTRL vs. siINHBB    |                    |                       |                      |               |             |     |
| growth curve     |                       |                    |                       |                      |               | 0,03        |     |
| Figure 3         |                       |                    |                       |                      |               |             |     |
| Figure 3A        |                       |                    |                       |                      |               |             |     |
| D458             | ActB                  |                    |                       |                      |               |             | n=3 |
| Psmad2/Actin     |                       |                    |                       |                      |               | 0,000575283 |     |
| Figure 3B        |                       |                    |                       |                      |               |             |     |
| D458             | ActB                  |                    |                       |                      |               |             | n=3 |
| growth curve     |                       |                    |                       |                      |               | < 0,0001    |     |
| Figure 3C        |                       |                    |                       |                      |               |             |     |
| D458             | ActB                  |                    |                       |                      |               |             | n=3 |
| G0-G1            |                       |                    |                       |                      |               | 0,0095      |     |
| S                |                       |                    |                       |                      |               | 0,0065      |     |
| G2+M             |                       |                    |                       |                      |               | 0,0732      |     |
| Figure 3D        |                       |                    |                       |                      |               |             |     |
| D458             | ActB                  |                    |                       |                      |               |             | n=3 |
| cleaved-caspase3 |                       |                    |                       |                      |               | 0,0155      |     |
| Figure 3E        |                       |                    |                       |                      |               |             |     |
| D283             | ActB                  |                    |                       |                      |               |             | n=4 |
| Psmad2/Actin     |                       |                    |                       |                      |               | 0,000294251 |     |
| Figure 3F        |                       |                    |                       |                      |               |             |     |
| D283             | ActB                  |                    |                       |                      |               |             | n=4 |
| growth curve     |                       |                    |                       |                      |               | < 0,0001    |     |
| Figure 3G        |                       |                    |                       |                      |               |             |     |
| D283             | ActB                  |                    |                       |                      |               |             | n=3 |
| G0-G1            |                       |                    |                       |                      |               | 0,0023      |     |
| S                |                       |                    |                       |                      |               | 0,0027      |     |
| G2+M             |                       |                    |                       |                      |               | 0,7211      |     |
| Figure 3H        |                       |                    |                       |                      |               |             |     |
| D283             | ActB                  |                    |                       |                      |               |             | n=3 |
| cleaved-caspase3 |                       |                    |                       |                      |               | 0,1453      |     |

**Figure 4**

| Figure 4A    |             | n=3         |  |
|--------------|-------------|-------------|--|
| 1603MED      | LY          | SB          |  |
| Psmad2/Actin |             |             |  |
| 24h          | 9,11709E-06 | 4,56647E-06 |  |

  

| Figure 4B    |        | n=3    |  |
|--------------|--------|--------|--|
| 1603MED      | LY     | SB     |  |
| growth curve | 0,0023 | 0,0014 |  |

  

| Figure 4C |        | n=3       |  |
|-----------|--------|-----------|--|
| 1603MED   | LY     | SB        |  |
| G0-G1     | 0,0277 | 0,0302291 |  |
| S         | 0,0178 | 0,0259227 |  |
| G2+M      | 0,9898 | 0,863702  |  |

  

| Figure 4D        |        | n=4    |  |
|------------------|--------|--------|--|
| 1603MED          | LY     | SB     |  |
| cleaved-caspase3 | 0,0293 | 0,0262 |  |

  

| Figure 4E    |             | n=3         |  |
|--------------|-------------|-------------|--|
| D283         | LY          | SB          |  |
| Psmad2/Actin | 1,75241E-05 | 8,51551E-06 |  |

  

| Figure 4F    |        | n=3      |  |
|--------------|--------|----------|--|
| D283         | LY     | SB       |  |
| growth curve | 0,0002 | < 0,0001 |  |

  

| Figure 4G |        | n=3        |  |
|-----------|--------|------------|--|
| D283      | LY     | SB         |  |
| G0-G1     | 0,2439 | 0,0960529  |  |
| S         | 0,0046 | 0,00437473 |  |
| G2+M      | 0,7114 | 0,828739   |  |

  

| Figure 4H        |        | n=3    |  |
|------------------|--------|--------|--|
| D283             | LY     | SB     |  |
| cleaved-caspase3 | 0,0084 | 0,0048 |  |

**Figure 5**

| Figure 5D               |          | n=3 |  |
|-------------------------|----------|-----|--|
| PMEPA1/Actin            |          |     |  |
| Group WNT vs. group SHH | 0,893    |     |  |
| Group WNT vs. group 3   | 0,0014   |     |  |
| Group WNT vs. group 4   | 0,1395   |     |  |
| Group SHH vs. group 3   | < 0,0001 |     |  |
| Group SHH vs. group 4   | 0,0007   |     |  |
| Group 3 vs. group 4     | 0,0349   |     |  |

  

| group WNT | group SHH | group 3 | group 4 |
|-----------|-----------|---------|---------|
| n=7       | n=12      | n=10    | n=9     |

| Figure 5G     |                         | n=4 |  |
|---------------|-------------------------|-----|--|
| 1603MED       | siCTRL vs. siPMEPA1pool |     |  |
| PMEPA1/Actine | 0,0286                  |     |  |

| Figure 5H    |                         | n=3 |  |
|--------------|-------------------------|-----|--|
| 1603MED      | siCTRL vs. siPMEPA1pool |     |  |
| growth curve | 0,046                   |     |  |

| Figure 5I     |                         | n=7 |  |
|---------------|-------------------------|-----|--|
| D283          | siCTRL vs. siPMEPA1pool |     |  |
| PMEPA1/Actine | 0,0006                  |     |  |

| Figure 5J    |                         | n=3 |  |
|--------------|-------------------------|-----|--|
| D283         | siCTRL vs. siPMEPA1pool |     |  |
| growth curve | 0,0002                  |     |  |

**Figure 6**

| Figure 6C    |        | n=4    |  |
|--------------|--------|--------|--|
| PDX3         | TGFb   | ActB   |  |
| Psmad2/Actin | 0,3143 | 0,0286 |  |

  

| Figure 6D    |      | n=3  |  |
|--------------|------|------|--|
| PDX4         | TGFb | ActB |  |
| Psmad2/Actin | 0,1  | 0,7  |  |

  

| Figure 6E    |          | n=4    |  |
|--------------|----------|--------|--|
| PDX7         | TGFb     | ActB   |  |
| Psmad2/Actin | > 0,9999 | 0,0286 |  |

  

| Figure 6D    |                       | n=3  |  |
|--------------|-----------------------|------|--|
| PDX4         | NCM vs. NCM+ab        | 0,25 |  |
| Psmad2/Actin | HD-CM vs. HD-CM+ab    | 0,25 |  |
| Psmad2/Actin | PDX4-CM vs NCM        | 0,05 |  |
| Psmad2/Actin | PDX4-CM vs HD-CM      | 0,05 |  |
| Psmad2/Actin | PDX4-CM vs PDX4-CM+Ab | 0,05 |  |

**Figure 7**

| Figure 7A                                                                                                                                                                                                                 |  | n=3 |  |  |
|---------------------------------------------------------------------------------------------------------------------------------------------------------------------------------------------------------------------------|--|-----|--|--|
| Ctrl vs Galu: Pvalue = 0,0001***<br>Ctrl vs Galu+Cis: Pvalue = 0,0096**<br>Ctrl vs Cis: Pvalue = 0,1021 ns<br>Galu vs Galu+Cis: Pvalue = 0,3441 ns<br>Galu vs Cis: Pvalue = 0,0022**<br>Galu+Cis vs Cis: Pvalue = 0,08 ns |  |     |  |  |

  

| Figure 7B   |              | n=3           |                   |  |
|-------------|--------------|---------------|-------------------|--|
| tumour size | CTRL vs. Cis | CTRL vs. Galu | CTRL vs. Galu+Cis |  |
| CTRL n=10   | 0,0431       | 0,0574        | 0,0347            |  |
|             | Cis n=10     | Galu n=6      | Galu + Cis n=7    |  |

  

| staining quantifications |              | n=3           |                   |  |
|--------------------------|--------------|---------------|-------------------|--|
| Psmad2/Total area        | CTRL vs. Cis | CTRL vs. Galu | CTRL vs. Galu+Cis |  |
|                          | 0,5962       | 0,001         | 0,0085            |  |

| Figure EV1              |          |
|-------------------------|----------|
| Fig EV1A                |          |
| ACTIN NORMALISATION     |          |
| Group WNT vs. group SHH | 0,0098   |
| Group WNT vs. group 3   | 0,0136   |
| Group WNT vs. group 4   | 0,4575   |
| Group SHH vs. group 3   | < 0,0001 |
| Group SHH vs. group 4   | 0,002    |
| Group 3 vs. group 4     | 0,0522   |
| SMAD NORMALISATION      |          |
| Group WNT vs. group SHH | 0,0098   |
| Group WNT vs. group 3   | 0,4028   |
| Group WNT vs. group 4   | 0,2463   |
| Group SHH vs. group 3   | < 0,0001 |
| Group SHH vs. group 4   | 0,0003   |
| Group 3 vs. group 4     | 0,7655   |
| WNT                     | n=7      |
| SHH                     | n=12     |
| Gp3                     | n=10     |
| Gp4                     | n=9      |

| Figure EV2   |                    |                         |                         |
|--------------|--------------------|-------------------------|-------------------------|
| Fig EV2A     |                    |                         |                         |
| 1603MED      | siCTRL vs. siINHBB | siCTRL vs. siINHBB+ActB | siINHBB vs siINHBB+ActB |
| Psmad2/Actin | 5,50897E-06        | 0,000014683             | 7,62238E-06             |
| n=8          |                    |                         |                         |
| Fig EV2B     |                    |                         |                         |
| 1603MED      | SiCTRL - SiINHBB   | SiINHBB vs. siINHBB+Ab  | SiCTRL vs. SiINHBB+Ab   |
|              | 0,0142             | 0,0195                  | 0,294                   |
| n=3          |                    |                         |                         |

| Figure EV3    |                       |                         |                         |
|---------------|-----------------------|-------------------------|-------------------------|
| Fig EV3A      |                       |                         |                         |
| 1603MED       | siCTRL vs. siINHBB    | siCTRL vs. siINHBB+ActB | siINHBB vs siINHBB+ActB |
| Psmad2/Actin  | 5,50897E-06           | 0,000014683             | 7,62238E-06             |
| PMEPA1/Actine | 5,23228E-08           | 0,00624415              | 0,000258717             |
| MYC/Actine    | 0,00118098            | 0,916968                | 0,103082                |
| OTX2/Actine   | 0,914512              | 0,36956                 | 0,426926                |
| n=8           |                       |                         |                         |
| Fig EV3B      |                       |                         |                         |
| D283          | siCTRL vs. siPMEPA1#1 | siCTRL vs. siPMEPA1p#2  |                         |
| PMEPA1/Actine | 0,0006                | 0,0006                  |                         |
| n=7           |                       |                         |                         |
| Fig EV3C      |                       |                         |                         |
| D283          | siCTRL vs. siPMEPA1#1 | siCTRL vs. siPMEPA1p#2  |                         |
| confluency    | 0,0003                | 0,0003                  |                         |
| n=7           |                       |                         |                         |
| Fig EV3D      |                       |                         |                         |
| 1603MED       | siCTRL vs. siPMEPA1#1 | siCTRL vs. siPMEPA1p#2  |                         |
| PMEPA1/Actine | 0,0286                | 0,0286                  |                         |
| n=4           |                       |                         |                         |
| Fig EV3E      |                       |                         |                         |
| 1603MED       | siCTRL vs. siPMEPA1#1 | siCTRL vs. siPMEPA1p#2  |                         |
| cell number   | 0,0079                | 0,0357                  |                         |
| n=3           |                       |                         |                         |

| Figure EV4                                 |              |               |                   |
|--------------------------------------------|--------------|---------------|-------------------|
| Fig EV4A                                   |              |               |                   |
| 1603MED                                    | Galu         |               |                   |
|                                            | 0,0027       |               |                   |
| n=3                                        |              |               |                   |
| D283                                       |              |               |                   |
|                                            | Galu         |               |                   |
|                                            | 0,0013       |               |                   |
| n=3                                        |              |               |                   |
| Fig EV4C                                   |              |               |                   |
| 1603MED                                    |              |               |                   |
|                                            | GALU         |               |                   |
| Psmad2/Actin                               | 0,000364399  |               |                   |
| PMEPA1/Actine                              | 0,000483894  |               |                   |
| MYC/Actine                                 | 3,45566E-07  |               |                   |
| OTX2/Actine                                | 0,617171     |               |                   |
| n=4                                        |              |               |                   |
| D283                                       |              |               |                   |
|                                            | GALU         |               |                   |
| Psmad2/Actin                               | 8,40701E-07  |               |                   |
| PMEPA1/Actine                              | 0,00578699   |               |                   |
| MYC/Actine                                 | 2,00173E-06  |               |                   |
| OTX2/Actine                                | 0,596591     |               |                   |
| n=4                                        |              |               |                   |
| PDX3                                       |              |               |                   |
|                                            | GALU         |               |                   |
| Psmad2/Actin                               | 2,16985E-10  |               |                   |
| PMEPA1/Actine                              | 1,31706E-07  |               |                   |
| MYC/Actine                                 | 0,0110236    |               |                   |
| OTX2/Actine                                | 0,0024861    |               |                   |
| n=3                                        |              |               |                   |
| PDX4                                       |              |               |                   |
|                                            | GALU         |               |                   |
| Psmad2/Actin                               | 1,4963E-06   |               |                   |
| PMEPA1/Actine                              | 1,05738E-07  |               |                   |
| MYC/Actine                                 | 0,0702494    |               |                   |
| OTX2/Actine                                | 0,3786       |               |                   |
| n=3                                        |              |               |                   |
| PDX7                                       |              |               |                   |
|                                            | GALU         |               |                   |
| Psmad2/Actin                               | 2,40096E-12  |               |                   |
| PMEPA1/Actine                              | 0,000110627  |               |                   |
| MYC/Actine                                 | 0,00016205   |               |                   |
| OTX2/Actine                                | 0,0090427    |               |                   |
| n=3                                        |              |               |                   |
| Fig EV4E                                   |              |               |                   |
| staining quantifications Psmad2/Total area | CTRL vs. Cis | CTRL vs. Galu | CTRL vs. Galu+Cis |
| Ki67                                       | 0,9134       | 0,5           | 0,4465            |
| cc3                                        | 0,9134       | 0,0899        | 0,1304            |
| CTRL n=12                                  | Cis n=10     | Galu n=6      | Galu + Cis n=7    |



| Appendix Figure S1  |               |                        |                        |                    |     |
|---------------------|---------------|------------------------|------------------------|--------------------|-----|
| Appendix Figure S1A | CTRL vs. ActB | CTRL vs. ActB+Ab-aActB | ActB vs. ActB+Ab-aActB | n=4                |     |
| Psmad2/Actin        | 0,0048        | 0,0048                 | 0,0286                 |                    |     |
|                     | CTRL vs. ActB | ActB vs. ActB+LY       | ActB vs. ActB+SB       | ActB vs. ActB+GalU | n=4 |
|                     | 0,0079        | 0,0286                 | 0,0286                 | 0,0286             |     |
| Appendix Figure S1B |               |                        |                        |                    |     |
| Appendix Figure S1B | CTRL vs. TGFb | CTRL vs. TGFb+Ab-aActB | TGFb vs. TGFb+Ab-aActB | n=4                |     |
| Psmad2/Actin        | 0,0286        | 0,0286                 | 0,8286                 |                    |     |
|                     | CTRL vs. TGFb | TGFb vs. TGFb+LY       | TGFb vs. TGFb+SB       | TGFb vs. TGFb+GalU | n=3 |
|                     | 0,05          | 0,05                   | 0,05                   | 0,05               |     |
| Appendix Figure S2  |               |                        |                        |                    |     |
| Appendix Figure S2A | HDMB03        | ActB                   | n=5                    |                    |     |
| Psmad2/Actin        |               | 0,0079                 |                        |                    |     |
| Appendix Figure S2B | HDMB03        | ActB                   | n=4                    |                    |     |
| Confluency          |               | 0,468                  |                        |                    |     |
| Appendix Figure S3  |               |                        |                        |                    |     |
| Appendix Figure S3C | 1603MED       | LY                     | SB                     | n=3                |     |
| PMEPA1/Actine       |               | 0,000255484            | 2,11743E-05            |                    |     |
| MYC/Actine          |               | 0,00096581             | 0,00378772             |                    |     |
| OTX2/Actine         |               | 0,476047               | 0,52631                |                    |     |
| D283                | LY            | SB                     | n=4                    |                    |     |
| PMEPA1/Actine       |               | 2,32921E-06            | 3,51897E-06            |                    |     |
| MYC/Actine          |               | 0,00360325             | 0,0246365              |                    |     |
| OTX2/Actine         |               | 0,293633               | 0,623413               |                    |     |
| D283                | ActB          | n=3                    |                        |                    |     |
| PMEPA1/Actine       |               | 0,00029355             |                        |                    |     |
| MYC/Actine          |               | 0,343751               |                        |                    |     |
| OTX2/Actine         |               | 0,0132184              |                        |                    |     |
| D458                | ActB          | n=4                    |                        |                    |     |
| PMEPA1/Actine       |               | 0,00368346             |                        |                    |     |
| MYC/Actine          |               | 0,0639103              |                        |                    |     |
| OTX2/Actine         |               | 0,000762444            |                        |                    |     |
| Appendix Figure S3D | 1603MED       | LY                     | SB                     | n=3                |     |
| Psmad2/Actin        |               |                        |                        |                    |     |
| 24h                 |               | 9,11709E-06            | 4,56647E-06            |                    |     |
| PMEPA1/Actine       |               | 0,00500923             | 0,0079822              |                    |     |
| MYC/Actine          |               | 0,00283955             | 0,0152516              |                    |     |
| OTX2/Actine         |               | 0,409986               | 0,220658               |                    |     |
| 1603MED             | Ab            | n=4                    |                        |                    |     |
| Psmad2/Actin        |               |                        |                        | FLST               |     |
| 24h                 |               | 0,000382311            |                        | 2,2781E-05         |     |
| PMEPA1/Actine       |               | 8,11523E-06            |                        | 0,00271064         |     |
| MYC/Actine          |               | 0,00831629             |                        | 0,0958693          |     |
| OTX2/Actine         |               | 0,876512               |                        | 0,386375           |     |
| D283                | LY            | SB                     | n=3                    |                    |     |
| Psmad2/Actin        |               |                        |                        |                    |     |
| 24h                 |               | 1,75241E-05            | 8,51551E-06            |                    |     |
| PMEPA1/Actine       |               | 0,00219095             | 0,0285833              |                    |     |
| MYC/Actine          |               | 0,00194504             | 0,0413334              |                    |     |
| OTX2/Actine         |               | 0,480343               | 0,238429               |                    |     |
| D283                | ActB          | n=4                    |                        |                    |     |
| Psmad2/Actin        |               |                        |                        |                    |     |
| 24h                 |               | 0,000294251            |                        |                    |     |
| PMEPA1/Actine       |               | 0,000582275            |                        |                    |     |
| MYC/Actine          |               | 0,001534               |                        |                    |     |
| OTX2/Actine         |               | 0,0359888              |                        |                    |     |
| D458                | ActB          | n=3                    |                        |                    |     |
| Psmad2/Actin        |               |                        |                        |                    |     |
| 24h                 |               | 0,000575283            |                        |                    |     |
| PMEPA1/Actine       |               | 0,0337263              |                        |                    |     |
| MYC/Actine          |               | 0,119118               |                        |                    |     |
| OTX2/Actine         |               | 0,864227               |                        |                    |     |
| Appendix Figure S4  |               |                        |                        |                    |     |
| Appendix Figure S4B | PDX3          | LY                     | SB                     | n=7                |     |
| PMEPA1/Actine       |               | 7,58483E-10            | 8,45776E-09            |                    |     |
| MYC/Actine          |               | 0,447207               | 0,462925               |                    |     |
| OTX2/Actine         |               | 0,196957               | 0,00447424             |                    |     |
| PDX4                | LY            | SB                     | n=5                    |                    |     |
| PMEPA1/Actine       |               | 5,32316E-08            | 5,16547E-09            |                    |     |
| MYC/Actine          |               | 0,0110324              | 0,145839               |                    |     |
| OTX2/Actine         |               | 0,73397                | 0,786599               |                    |     |
| PDX7                | LY            | SB                     | n=4                    |                    |     |
| PMEPA1/Actine       |               | 0,00444009             | 0,00172518             |                    |     |
| MYC/Actine          |               | 0,00264169             | 0,0748821              |                    |     |
| OTX2/Actine         |               | 0,280295               | 0,54736                |                    |     |
| PDX3                | ActB          | n=3                    |                        |                    |     |
| PMEPA1/Actine       |               | 0,0672152              |                        |                    |     |
| MYC/Actine          |               | 0,0753677              |                        |                    |     |
| OTX2/Actine         |               | 0,0546868              |                        |                    |     |
| PDX7                | ActB          | n=3                    |                        |                    |     |
| PMEPA1/Actine       |               | 0,216253               |                        |                    |     |
| MYC/Actine          |               | 0,113895               |                        |                    |     |
| OTX2/Actine         |               | 0,270416               |                        |                    |     |
| Appendix Figure S4C | PDX3          | LY                     | SB                     | n=6                |     |
| Psmad2/Actin        |               |                        |                        |                    |     |
| 24h                 |               | 7,36256E-08            | 6,45964E-07            |                    |     |
| PMEPA1/Actine       |               | 0,000123149            | 0,000202419            |                    |     |
| MYC/Actine          |               | 0,309977               | 0,0286538              |                    |     |
| OTX2/Actine         |               | 0,518319               | 0,375461               |                    |     |
| PDX4                | LY            | SB                     | n=3                    |                    |     |

|               |             |             |
|---------------|-------------|-------------|
| Psmad2/Actin  |             |             |
| 24h           | 0,000268245 | 0,000708827 |
| PMEPA1/Actine | 0,000224456 | 9,04785E-06 |
| MYC/Actine    | 0,386431    | 0,914608    |
| OTX2/Actine   | 0,946689    | 0,343322    |

|               |            |     |             |     |
|---------------|------------|-----|-------------|-----|
| <b>PDX4</b>   | <b>Ab</b>  | n=4 | <b>FLST</b> | n=3 |
| Psmad2/Actin  |            |     |             |     |
| 24h           | 0,00233629 |     | 1,25386E-05 |     |
| PMEPA1/Actine | 0,00117035 |     | 1,5366E-05  |     |
| MYC/Actine    | 0,0184714  |     | 0,000015217 |     |
| OTX2/Actine   | 0,489486   |     | 0,00449743  |     |

|               |             |  |             |     |
|---------------|-------------|--|-------------|-----|
| <b>PDX7</b>   | <b>LY</b>   |  | <b>SB</b>   | n=4 |
| Psmad2/Actin  |             |  |             |     |
| 24h           | 5,70068E-09 |  | 3,62086E-09 |     |
| PMEPA1/Actine | 1,16054E-06 |  | 0,000352    |     |
| MYC/Actine    | 0,00158669  |  | 0,000403743 |     |
| OTX2/Actine   | 0,154355    |  | 0,17975     |     |

|               |             |     |
|---------------|-------------|-----|
| <b>PDX3</b>   | <b>ActB</b> | n=4 |
| Psmad2/Actin  |             |     |
| 24h           | 0,149101    |     |
| PMEPA1/Actine | 0,0346483   |     |
| MYC/Actine    | 0,000885645 |     |
| OTX2/Actine   | 0,136323    |     |

|               |             |     |
|---------------|-------------|-----|
| <b>PDX7</b>   | <b>ActB</b> | n=5 |
| Psmad2/Actin  |             |     |
| 24h           | 0,00283622  |     |
| PMEPA1/Actine | 7,45566E-05 |     |
| MYC/Actine    | 0,00258122  |     |
| OTX2/Actine   | 0,156133    |     |

**Appendix Figure S5**

|                                       |                    |                      |                       |                    |
|---------------------------------------|--------------------|----------------------|-----------------------|--------------------|
| <b>Appendix Figure S5 - Figure 1C</b> |                    |                      |                       |                    |
|                                       | <b>D458 vs All</b> | <b>HDMBO3 vs All</b> | <b>MED1603 vs all</b> | <b>D283 vs all</b> |
| Psmad2/Smad2                          | 0,0011             | 0,2685               | < 0,0001              | 0,6494             |
| n=8 per cell line                     |                    |                      |                       |                    |

|                                       |             |             |     |
|---------------------------------------|-------------|-------------|-----|
| <b>Appendix Figure S5 - Figure 2A</b> |             |             |     |
| <b>DAOY</b>                           | <b>TGFb</b> | <b>ActB</b> | n=5 |
| Psmad2/Smad2                          | 0,0079      | 0,6825      |     |

|              |             |             |     |
|--------------|-------------|-------------|-----|
| <b>ONS</b>   | <b>TGFb</b> | <b>ActB</b> | n=4 |
| Psmad2/Smad2 | 0,0286      | > 0,9999    |     |

|              |             |             |     |
|--------------|-------------|-------------|-----|
| <b>UW</b>    | <b>TGFb</b> | <b>ActB</b> | n=4 |
| Psmad2/Smad2 | 0,0286      | 0,3143      |     |

|               |             |             |     |
|---------------|-------------|-------------|-----|
| <b>HDMBO3</b> | <b>TGFb</b> | <b>ActB</b> | n=6 |
| Psmad2/Smad2  | 0,4405      | 0,0022      |     |

|              |             |             |     |
|--------------|-------------|-------------|-----|
| <b>D458</b>  | <b>TGFb</b> | <b>ActB</b> | n=5 |
| Psmad2/Smad2 | 0,4643      | 0,0079      |     |

|                |             |             |     |
|----------------|-------------|-------------|-----|
| <b>1603MED</b> | <b>TGFb</b> | <b>ActB</b> | n=3 |
| Psmad2/Smad2   | 0,1         | 0,1         |     |

|              |             |             |     |
|--------------|-------------|-------------|-----|
| <b>D283</b>  | <b>TGFb</b> | <b>ActB</b> | n=4 |
| Psmad2/Smad2 | 0,0286      | 0,0286      |     |

|                                               |             |     |  |
|-----------------------------------------------|-------------|-----|--|
| <b>Appendix Figure S5 - Figure 2B and S3D</b> |             |     |  |
| <b>1603MED</b>                                | <b>Ab</b>   | n=4 |  |
| Psmad2/Smad2                                  | 0,000486899 |     |  |
|                                               | <b>FLST</b> | n=4 |  |
| Psmad2/Smad2                                  | 3,64454E-05 |     |  |

|                                       |                       |        |  |
|---------------------------------------|-----------------------|--------|--|
| <b>Appendix Figure S5 - Figure 2C</b> |                       |        |  |
| <b>1603MED</b>                        | n=3                   |        |  |
| Psmad2/Smad2                          | NCM vs. NCM+ab        | 0,3377 |  |
| Psmad2/Smad2                          | HD-CM vs. HD-CM+ab    | 0,35   |  |
| Psmad2/Smad2                          | 1603-CM vs NCM        | 0,0119 |  |
| Psmad2/Smad2                          | 1603-CM vs HD-CM      | 0,0119 |  |
| Psmad2/Smad2                          | 1603-CM vs 1603-CM+Ab | 0,05   |  |

|                                         |                           |                                |                                |
|-----------------------------------------|---------------------------|--------------------------------|--------------------------------|
| <b>Appendix Figure S5 - Figure EV2A</b> |                           |                                |                                |
| <b>1603MED</b>                          | <b>siCTRL vs. siINHBB</b> | <b>siCTRL vs. siINHBB+ActB</b> | <b>siINHBB vs siINHBB+ActB</b> |
| Psmad2/Smad2                            | 5,33998E-05               | 0,0069216                      | 0,000588218 n=8                |

|                                       |             |     |  |
|---------------------------------------|-------------|-----|--|
| <b>Appendix Figure S5 - Figure 3A</b> |             |     |  |
| <b>D458</b>                           | <b>ActB</b> | n=3 |  |
| Psmad2/Smad2                          | 0,00151788  |     |  |

|                                       |             |     |  |
|---------------------------------------|-------------|-----|--|
| <b>Appendix Figure S5 - Figure 3E</b> |             |     |  |
| <b>D283</b>                           | <b>ActB</b> | n=4 |  |
| Psmad2/Smad2                          | 0,00271302  |     |  |

|                                              |             |             |     |
|----------------------------------------------|-------------|-------------|-----|
| <b>Appendix Figure S5 - Figure 4E and 4A</b> |             |             |     |
| <b>D283</b>                                  | <b>LY</b>   | <b>SB</b>   | n=3 |
| Psmad2/Smad2                                 | 5,09217E-06 | 7,20888E-07 |     |

|                |             |            |     |
|----------------|-------------|------------|-----|
| <b>MED1603</b> | <b>LY</b>   | <b>SB</b>  | n=3 |
| Psmad2/Smad2   | 2,21229E-06 | 2,6165E-06 |     |

|                                       |             |             |     |
|---------------------------------------|-------------|-------------|-----|
| <b>Appendix Figure S5 - Figure 6C</b> |             |             |     |
| <b>PDX3</b>                           | <b>TGFb</b> | <b>ActB</b> | n=4 |
| Psmad2/Smad2                          | 0,1587      | 0,0159      |     |

|              |             |             |     |
|--------------|-------------|-------------|-----|
| <b>PDX4</b>  | <b>TGFb</b> | <b>ActB</b> | n=3 |
| Psmad2/Smad2 | 0,7         | 0,7         |     |

|              |             |             |     |
|--------------|-------------|-------------|-----|
| <b>PDX7</b>  | <b>TGFb</b> | <b>ActB</b> | n=4 |
| Psmad2/Smad2 | 0,3143      | 0,0286      |     |

|                                       |                       |        |  |
|---------------------------------------|-----------------------|--------|--|
| <b>Appendix Figure S5 - Figure 6D</b> |                       |        |  |
| <b>PDX4</b>                           | n=3                   |        |  |
| Psmad2/Smad2                          | NCM vs. NCM+ab        | 0,375  |  |
| Psmad2/Smad2                          | HD-CM vs. HD-CM+ab    | 0,35   |  |
| Psmad2/Smad2                          | PDX4-CM vs NCM        | 0,0119 |  |
| Psmad2/Smad2                          | PDX4-CM vs HD-CM      | 0,0119 |  |
| Psmad2/Smad2                          | PDX4-CM vs PDX4-CM+Ab | 0,05   |  |

|                                         |             |     |  |
|-----------------------------------------|-------------|-----|--|
| <b>Appendix Figure S5 - Figure EV4C</b> |             |     |  |
| <b>1603MED</b>                          | <b>GALU</b> | n=4 |  |
| Psmad2/Smad2                            | 3,45566E-07 |     |  |
| <b>D283</b>                             | <b>GALU</b> | n=4 |  |

|                                          |               |             |                        |             |                        |        |
|------------------------------------------|---------------|-------------|------------------------|-------------|------------------------|--------|
| Psmad2/Smad2                             | 1,78302E-05   |             |                        |             |                        |        |
| PDX3                                     | GALU          | n=6         |                        |             |                        |        |
| Psmad2/Smad2                             | 1,10815E-14   |             |                        |             |                        |        |
| PDX4                                     | GALU          | n=3         |                        |             |                        |        |
| Psmad2/Smad2                             | 1,72102E-05   |             |                        |             |                        |        |
| PDX7                                     | GALU          | n=3         |                        |             |                        |        |
| Psmad2/Smad2                             | 1,08588E-09   |             |                        |             |                        |        |
| Appendix Figure S5 - Appendix Figure S1A |               |             |                        |             |                        |        |
| Psmad2/Smad2                             | CTRL vs. ActB | 0,0022      | CTRL vs. ActB+Ab-aActB | 0,0476      | ActB vs. ActB+Ab-aActB | 0,0087 |
| Psmad2/Smad2                             | CTRL vs. ActB | 0,0286      | ActB vs. ActB+LY       | 0,0286      | ActB vs. ActB+SB       | 0,0286 |
| Psmad2/Smad2                             | CTRL vs. ActB | 0,0286      | ActB vs. ActB+Galu     |             |                        | 0,0286 |
| Appendix Figure S5 - Appendix Figure S1B |               |             |                        |             |                        |        |
| Psmad2/Smad2                             | CTRL vs. TGFb | 0,0079      | CTRL vs. TGFb+Ab-aActB | 0,0079      | TGFb vs. TGFb+Ab-aActB | 0,8571 |
| Psmad2/Smad2                             | CTRL vs. TGFb | 0,0286      | TGFb vs. TGFb+LY       | 0,0286      | TGFb vs. TGFb+SB       | 0,0286 |
| Psmad2/Smad2                             | CTRL vs. TGFb | 0,0286      | TGFb vs. TGFb+Galu     |             |                        | 0,0286 |
| Appendix Figure S5 - Appendix Figure S2A |               |             |                        |             |                        |        |
| HDMB03                                   | ActB          | n=5         |                        |             |                        |        |
| Psmad2/Smad2                             |               | 0,0079      |                        |             |                        |        |
| Appendix Figure S5 - Appendix Figure S4C |               |             |                        |             |                        |        |
| PDX3                                     | LY            |             | SB                     |             |                        | n=6    |
| Psmad2/Smad2                             |               | 1,34017E-08 |                        | 5,04918E-06 |                        |        |
| PDX4                                     | LY            |             | SB                     |             |                        | n=3    |
| Psmad2/Smad2                             |               | 0,0010285   |                        | 0,00183895  |                        |        |
| PDX4                                     | Ab            | n=4         |                        |             | FLST                   | n=3    |
| Psmad2/Smad2                             |               | 0,00218201  |                        |             | 2,36944E-07            |        |
| PDX7                                     | LY            |             | SB                     |             |                        | n=4    |
| Psmad2/Smad2                             |               | 4,12389E-09 |                        | 3,90988E-09 |                        |        |
| PDX3                                     | ActB          | n=4         |                        |             |                        |        |
| Psmad2/Smad2                             |               | 0,136817    |                        |             |                        |        |
| PDX7                                     | ActB          | n=5         |                        |             |                        |        |
| Psmad2/Smad2                             |               | 0,000204885 |                        |             |                        |        |

## Appendix Supplemental Figure legends

**Appendix Figure S1: Pharmacological inhibitors and blocking antibody specificity.** (A-B) WB analysis performed in D283 group 3 MB cell line (A) and UW228 non group 3 MB cell line (B). The level of phosphorylated Smad2 (P-Smad2) and total Smad2 (Smad2) was assessed by Immunoblot in response to DMSO or LY364947 or SB431542 or Galunisertib or ActivinB blocking antibody (Ab  $\alpha$ -ActB) after either ActivinB (ActB) or TGF $\beta$  stimulation for 1 hour.  $\beta$ -actin was used as a loading control. Right panel represents relative quantifications of the P-S2/  $\beta$ -actin. The p-values were determined by unpaired t-test. \*p < 0.05, \*\*p < 0.01, \*\*\*p < 0.001. Bars represent the mean  $\pm$  SD. Number of replicates is n $\geq$ 3.

**Appendix Figure S2: ActivinB stimulation does not promote growth in HDMB03 cells (A-B)** HDMB03 cell line was treated with PBS (vehicle, black) or with ActivinB (green). (A) Immunoblot of phosphorylated Smad2 (P-Smad2), total Smad2 and  $\beta$ -actin in response to ActivinB stimulation for 24 hours. Quantification of P-Smad2 (P-S2) to  $\beta$ -actin is shown on right panels. (B) Growth curve experiments showing cell proliferation upon ActivinB treatment. \*\*p < 0.01. Bars represent the mean  $\pm$  SD. Number of replicates is n $\geq$ 3.

**Appendix Figure S3: *PMEPA1* is a target gene of Activin signaling.** (A) Scatter plot of *INHBB* and *PMEPA1* gene expression levels in the 4 individual MB groups. Note that panel, corresponding to group 3 (yellow) is identical to that shown in Figure EV4E, except for the colour code (B) Scatter plots of P-Smad2 and *PMEPA1* protein levels in the 4 MB groups. (A-B) Colored dots represent each patient samples and colors represent the MB groups (WNT in blue, SHH in red, Group 3 in yellow and Group 4 in green). Spearman's rank correlation coefficient  $\rho$  and p-value are indicated on top. (C) RT-qPCR were performed on RNA extracted from 1603MED, D283 and D458 to compare expression levels of target genes upon inhibition and stimulation of TGF $\beta$ /Activin signaling by LY364947 or SB431542 inhibitors and ActivinB stimulation. Relative expression level to control is presented. (D) Quantification of the WB presented in Figure 5G. Bar graphs represent the relative quantifications of the indicated proteins relative to  $\beta$ -actin. Note that P-Smad2/ $\beta$ -actin quantification is identical to quantification in Figure 2B, 3A, 3E, 4A and 4E. The different treatments are indicated. The level in control conditions was set at 1. The p-values were determined by Spearman rank correlation test for A and B and unpaired t-test for C and D. Detailed statistics are presented in Appendix Table S3 for A. \*p < 0.05, \*\*p < 0.01 and \*\*\*p < 0.001. Bars represent the mean  $\pm$  SD. Number of replicates is n $\geq$ 3.

**Appendix Figure S4: TGF $\beta$ /ActivinB signaling in group 3 MB PDXs.** (A) Relative mRNA expression of TGF $\beta$ /ActivinB different mediators in G3 PDXs and cell lines. Expression in HDMB03 was set at 1. RT-qPCR were performed on RNA extracted from Group 3 MB cell lines and PDXs as indicated to compare the expression levels of mediators of the TGF $\beta$ /ActivinB pathway in the different PDXs in regards to cell lines: *INHBA*, *TGFB1*, *TGFB2*, *TGFB3*, *ACVR1B*, *ACVR1C*, *ACVR2A*, *ACVR2B*, *TGFBR1* and *TGFBR2*. (B) RT-qPCR were performed on RNA extracted from Group 3 MB cell lines and PDXs to compare relative expression of target genes upon inhibition or stimulation of TGF $\beta$ /Activin signaling by LY364947 and SB431542 inhibitors and ActivinB stimulation. Expression in control condition was set at 1. Detailed statistics are presented in Appendix Table S2. (C) Quantification of WB presented in Figure 6E. The relative level to  $\beta$ -actin is presented for the different proteins. The level in control conditions was set at 1. The p-values were determined by unpaired t-test. \*p < 0.05, \*\*p < 0.01 and \*\*\*p < 0.001. Bars represent the mean  $\pm$  SD. Number of replicates is n $\geq$ 3.

**Appendix Figure S5: P-Smad2/Total Smad2 normalization**

The P-Smad2/Total Smad2 normalization is provided for all relevant WB in the manuscript figures as indicated by the corresponding Figure panel number. Code colors as well as numbers below the plots are identical to those in the corresponding figure panels.

## **Appendix Supplemental Table legends**

### **Appendix Table S1:** Statistics related to Figure 1B, 5B-C and EV1B

Statistics related to transcriptomic analyses on dataset from "Data ref: Cavalli et al, 2017". (Cancer Cell. 2017; 31(6):737-754.e6. doi: 10.1016/j.ccell.2017.05.005.)

### **Appendix Table S2:** Statistics related to Figure 1D, 6B and EV1D and Appendix Figure S4A

Statistics related to RT-qPCR experiments assessing expression levels of the TGF $\beta$ /ActivinB signaling pathway mediators performed in cell lines and PDX

### **Appendix Table S3:** Statistics related to Figure 7D-E

Spearman correlation ( $\rho$  and p-values) related to the analyses performed on dataset from "Data ref: Cavalli et al, 2017" (Cancer Cell. 2017; 31(6):737-754.e6. doi: 10.1016/j.ccell.2017.05.005.) for INHBB, PMEPA1, MYC and NRL.

**Appendix Table S4:** Sequences of the oligonucleotides used in this study for RT-qPCR experiments

**Appendix Table S5:** Exact p-values and number of replicates for each experiment.

The exact p-values and number of replicates corresponding to the relevant figures and panels are provided.
