# Supplementary material for: An autocrine ActivinB mechanism drives TGFβ/Activin signaling in Group 3 medulloblastoma
Source: PubMed Central journal article supplement (PMC6685082; doi:10.15252/emmm.201809830), 2019-07-22

# Figure 3

D458 D283 P/A

## D283

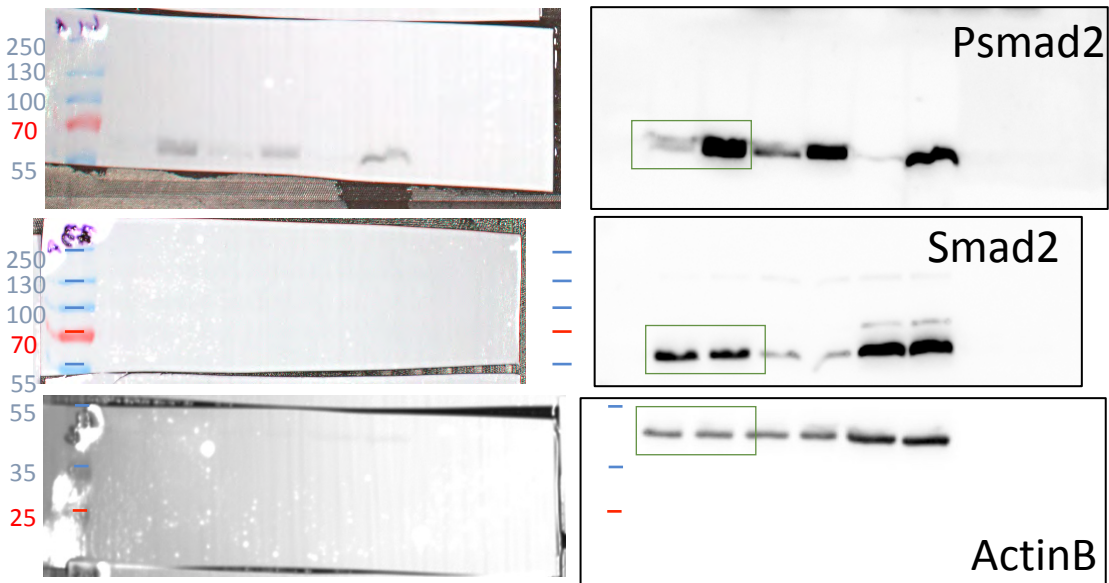

## D458 PA WB SAB\_ PSMAD

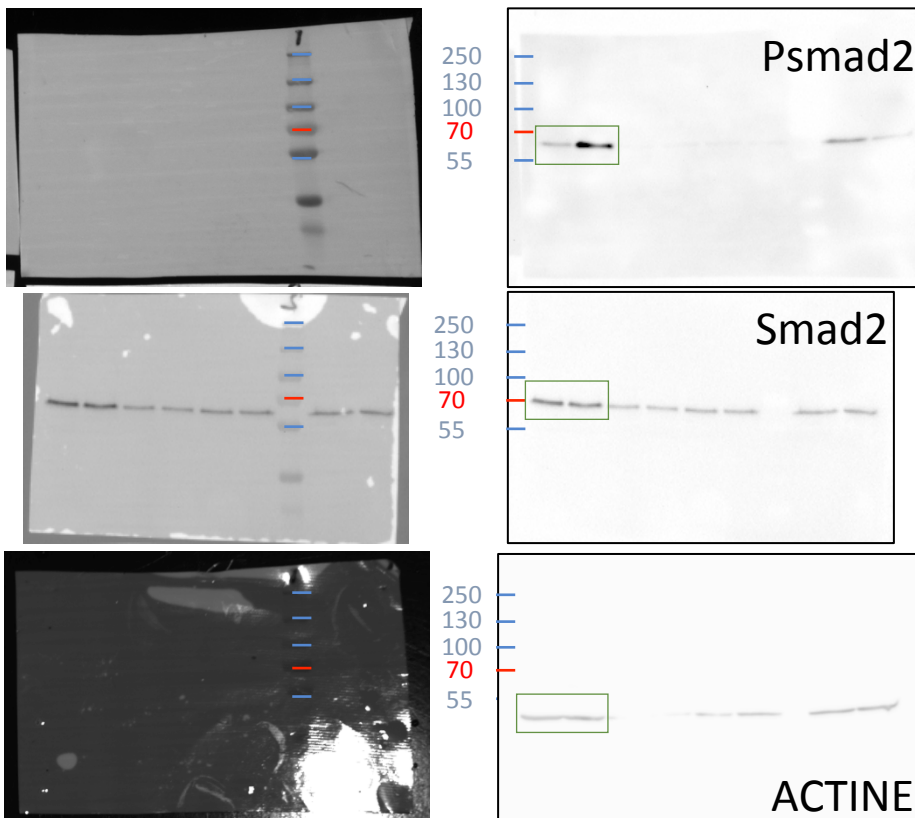

Supplement: EMMM-11-e9830-s005.pdf [file EMMM-11-e9830-s005.pdf]
