# Supplementary material for: An autocrine ActivinB mechanism drives TGFβ/Activin signaling in Group 3 medulloblastoma
Source: PubMed Central journal article supplement (PMC6685082; doi:10.15252/emmm.201809830), 2019-07-22

# Figure 4

1603MEd and S283 D/L/S

## 1603MED D L S \_ PSMAD

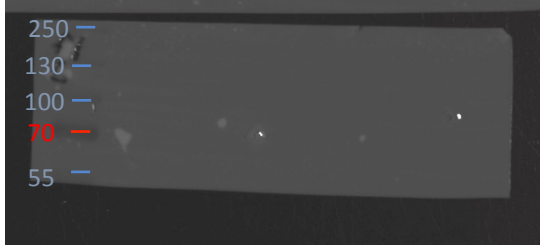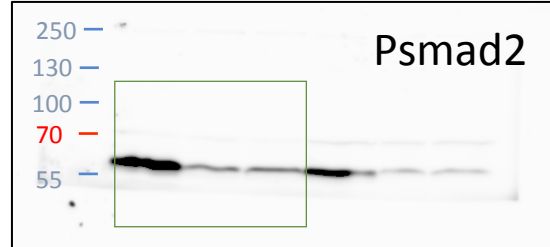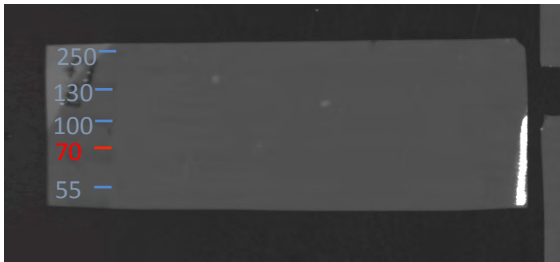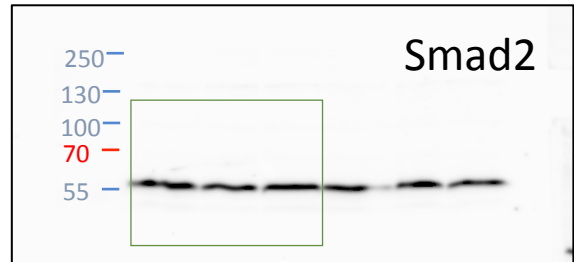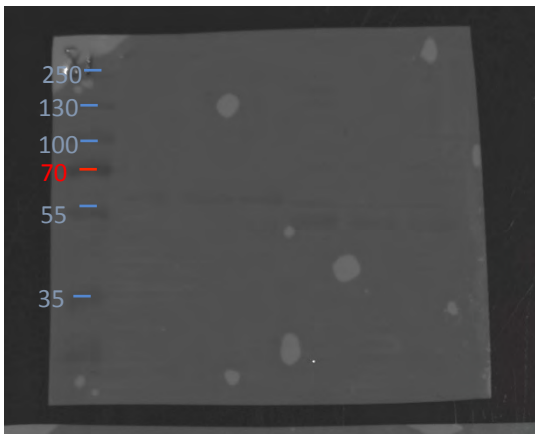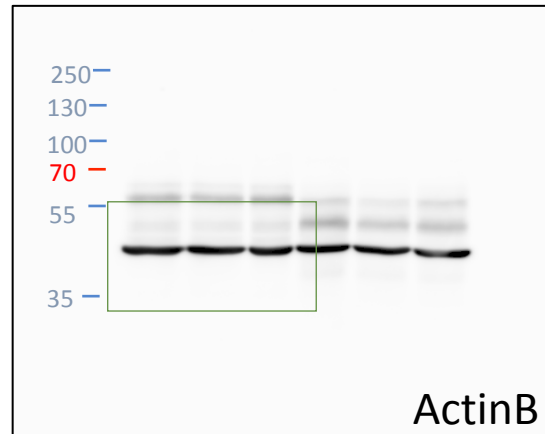

## D283 D L S WB40\_ PSMAD

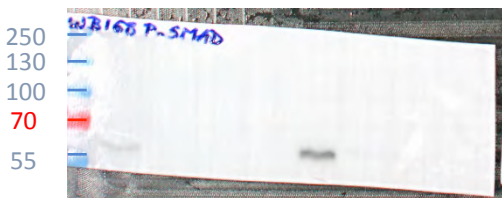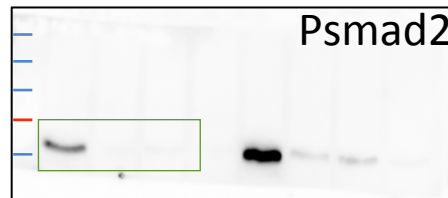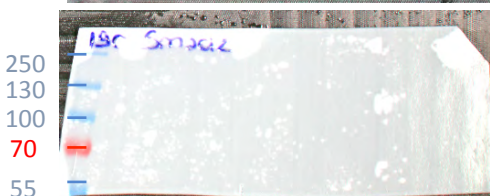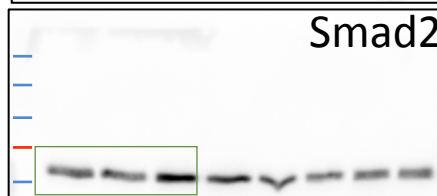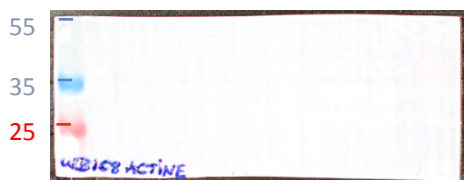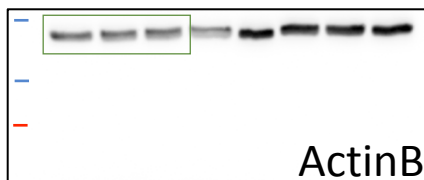

Supplement: EMMM-11-e9830-s006.pdf [file EMMM-11-e9830-s006.pdf]
